# Supplementary material for: Accuracy and precision of U–Pb zircon geochronology at high spatial resolution (7–20 μm spots) by laser ablation-ICP-single-collector-sector-field-mass spectrometry
Source: Royal Society of Chemistry journal article supplement (doi:10.1039/c8ja00321a), 2018-11-21
Supplement: c8ja00321a1.xlsx [file c8ja00321a1.xlsx]

## Sheet: 20um28s
Supplementary Data Table A1: U-Pb data for 20 µm spots, 28 sec integration interval
12/04/2018 Mineral Isotope Laser Laboratory (MILL), Texas Tech University										Data for Tera-Wasserburg plot2				Data for Wetherill plot3					Dates (Ma)3									207-235	207-206			Concordia Age (Ma)		%Age Offset
Identifier	Comments	Duration (s)	#points	206Pb cps	U ppm1	Th/U1	U/Pb1	206Pb/204Pb	2SE	238U/206Pb	2SE	207Pb/206Pb	2SE	207Pb/235U	2SE	206Pb/238U	2SE	Rho	207Pb/235U	2s	2ssys	206Pb/238U	2s	2ssys	207Pb/206Pb	2s	2ssys	% Conc4	% Conc5	Rejects	Age	+2SE	MSWD
FC_1_1	7412m_TRA_Data 238ReCal 20um April12 data	26.121	131	595000	687	1.94323	0.948895	15454.5	441.558	5.131	0.036	0.07637	0.00046	2.042	0.015	0.1948	0.0014	0.61235	1129.1	4.9	10	1147.2	7.5	7.5	1104	12	30	101.603	103.913
FC_1_2	7412m_TRA_Data 238ReCal 20um April12 data	26.11	132	463000	540	1.87593	0.990826	71230.8	1846.15	5.201	0.035	0.07633	0.00046	2.017	0.016	0.1921	0.0013	0.61052	1120.9	5.4	10	1132.7	7.1	7.2	1101	12	30	101.053	102.879
FC_1_3	7412m_TRA_Data 238ReCal 20um April12 data	26.119	132	446000	514	1.44553	1.30061	10252.9	275.862	5.127	0.038	0.07575	0.00047	2.031	0.016	0.1953	0.0015	0.71319	1125.4	5.5	10	1149.6	7.8	7.8	1088	12	29	102.15	105.662
FC_1_4	7412m_TRA_Data 238ReCal 20um April12 data	26.119	132	341300	397	1.46599	1.28396	15874.4	293.023	5.196	0.038	0.07587	0.0005	2.004	0.016	0.1923	0.0013	0.63459	1116.9	5.3	10	1133.8	7.3	7.3	1090	13	30	101.513	104.018
FC_1_5	7412m_TRA_Data 238ReCal 20um April12 data	26.108	132	520000	601	2.00499	0.937598	13866.7	293.333	5.13	0.032	0.07673	0.00044	2.05	0.013	0.1949	0.0012	0.56996	1132.1	4.5	10	1147.8	6.4	6.4	1112	11	30	101.387	103.219		DISCORDANT
FC_1_6	7412m_TRA_Data 238ReCal 20um April12 data	26.127	131	661400	768	1.7474	1.07233	19171	272.464	5.148	0.036	0.07658	0.00038	2.041	0.014	0.1943	0.0013	0.71641	1129.3	4.9	10	1144.3	7.1	7.1	1108.5	9.9	29	101.328	103.23
FC_1_7	7412m_TRA_Data 238ReCal 20um April12 data	26.116	131	430000	502.4	1.25577	1.51189	9662.92	87.6404	5.15	0.036	0.07679	0.00053	2.046	0.017	0.1941	0.0013	0.60136	1130.6	5.8	11	1143.4	7.2	7.2	1116	14	31	101.132	102.455
FC_1_8	7412m_TRA_Data 238ReCal 20um April12 data	26.113	132	502000	579	1.42832	1.31352	4995.02	109.453	5.121	0.028	0.07611	0.00044	2.045	0.014	0.1952	0.0011	0.61792	1130.8	4.7	10	1150.1	5.8	5.8	1096	11	30	101.707	104.936
FC_1_9	7412m_TRA_Data 238ReCal 20um April12 data	26.118	132	339300	400	0.84	2.30947	15781.4	297.674	5.215	0.039	0.07656	0.00054	2.022	0.019	0.1918	0.0015	0.66602	1125.1	6.2	11	1131.8	8	8	1107	14	31	100.596	102.24
FC_1_10	7412m_TRA_Data 238ReCal 20um April12 data	26.12	132	401600	473	0.811205	2.35206	11988.1	202.985	5.186	0.042	0.07679	0.00052	2.038	0.016	0.1924	0.0015	0.66704	1128.9	5.4	10	1134.5	8.1	8.1	1114	14	31	100.496	101.84
Fish_Can_1	7412m_TRA_Data 238ReCal 20um April12 data	26.118	132	15340	826	0.544068	138.358	309.899	6.26263	225.4	2.6	0.048	0.0016	0.0294	0.00094	0.004444	4.9e-05	0.084635	29.41	0.93	1	28.58	0.32	0.32	85	69	75	97.1778	33.6235
Fish_Can_2	7412m_TRA_Data 238ReCal 20um April12 data	26.115	132	13440	698.9	0.612677	118.257	308.966	4.13793	219.7	3.1	0.0476	0.0016	0.03	0.00099	0.004555	6.5e-05	0.09094	30	0.97	1	29.3	0.42	0.42	80	72	78	97.6667	36.625
Fish_Can_3	7412m_TRA_Data 238ReCal 20um April12 data	26.116	132	14790	794	0.52267	145.956	799.459	29.1892	222.5	2.8	0.0465	0.0018	0.0289	0.0011	0.004505	5.6e-05	0.14109	28.9	1.1	1.1	28.98	0.36	0.36	48	79	84	100.277	60.375
Fish_Can_4	7412m_TRA_Data 238ReCal 20um April12 data	26.104	132	22520	1176	0.704932	105.66	2370.53	36.8421	218.2	2.3	0.0477	0.0013	0.02989	0.00079	0.004595	4.7e-05	0.066761	29.97	0.78	0.87	29.55	0.3	0.3	83	58	65	98.5986	35.6024
Fish_Can_5	7413m_TRA_Data 238ReCal 20um April12 data	26.126	132	18320	974	0.552361	142.606	377.732	13.1959	220.4	2.2	0.0475	0.0014	0.02966	0.00082	0.004542	4.6e-05	0.028451	29.67	0.81	0.89	29.21	0.3	0.3	73	62	69	98.4496	40.0137
Fish_Can_6	7413m_TRA_Data 238ReCal 20um April12 data	26.173	132	8150	426	0.988498	80.3774	250.769	8	218.1	3.4	0.0474	0.0021	0.0299	0.0013	0.004597	6.9e-05	0.19581	29.9	1.3	1.3	29.57	0.44	0.44	73	86	90	98.8963	40.5068	0	29.28	0.11	2.4263	2.81621
Fish_Can_7	7413m_TRA_Data 238ReCal 20um April12 data	26.114	132	16990	898	0.507572	143.91	1171.72	26.8966	220.1	2.7	0.0472	0.0015	0.02959	0.00098	0.004532	5.3e-05	0.18267	29.59	0.97	1	29.15	0.34	0.34	70	70	76	98.513	41.6429
Fish_Can_8	7413m_TRA_Data 238ReCal 20um April12 data	26.125	132	4750	263	1.09886	68.4896	193.878	12.6531	220.4	4.3	0.0494	0.0037	0.0306	0.0021	0.004529	8.7e-05	0.077441	30.5	2.1	2.1	29.13	0.56	0.56	190	140	150	95.5082	15.3316
Fish_Can_9	7413m_TRA_Data 238ReCal 20um April12 data	26.109	132	7050	375	0.833333	90.3614	131.776	4.29907	216.7	4	0.0473	0.0025	0.0299	0.0016	0.004592	8.3e-05	0.13523	29.9	1.6	1.6	29.53	0.53	0.53	50	110	110	98.7625	59.06
Fish_Can_10	7413m_TRA_Data 238ReCal 20um April12 data	26.123	131	10710	562	0.588256	128.311	856.8	35.2	216.1	3	0.0472	0.0017	0.0299	0.001	0.004634	6.4e-05	0.10953	30	1	1.1	29.81	0.41	0.41	68	76	81	99.3667	43.8382
Plesovice_1	7413m_TRA_Data 238ReCal 20um April12 data	26.11	132	175900	773	0.110608	54.629	8580.49	121.951	18.12	0.13	0.0534	0.00052	0.4048	0.0039	0.05521	0.00038	0.34637	345	2.9	4.8	346.6	2.4	2.4	342	22	38	100.464	101.345
Plesovice_2	7413m_TRA_Data 238ReCal 20um April12 data	26.12	131	198000	879	0.114733	54.5624	6491.8	59.0164	18.14	0.11	0.05344	0.00055	0.4037	0.0039	0.05519	0.00032	0.15858	344.2	2.9	4.8	346.3	2	2	346	23	38	100.61	100.087
Plesovice_3	7413m_TRA_Data 238ReCal 20um April12 data	26.115	132	250500	1117	0.116831	52.639	501000	5400	18.27	0.12	0.05325	0.00046	0.3988	0.0036	0.05468	0.00035	0.41549	340.9	2.6	4.6	343.2	2.1	2.1	335	20	37	100.675	102.448
Plesovice_4	7413m_TRA_Data 238ReCal 20um April12 data	26.124	131	211800	940	0.115957	53.653	18417.4	200	18.24	0.12	0.05354	0.00046	0.4017	0.0034	0.05477	0.00037	0.42149	342.8	2.5	4.5	343.8	2.3	2.3	351	19	37	100.292	97.9487
Plesovice_5	7413m_TRA_Data 238ReCal 20um April12 data	26.113	131	229900	1032	0.115795	53.0319	459800	5400	18.4	0.12	0.05283	0.00053	0.3944	0.0038	0.05439	0.00035	0.24364	337.5	2.8	4.7	341.4	2.1	2.1	327	22	37	101.156	104.404	2	342.39	0.66	1.76	1.56927
Plesovice_6	7413m_TRA_Data 238ReCal 20um April12 data	26.117	132	232000	1038	0.122158	49.6888	42181.8	945.455	18.34	0.1	0.05409	0.00046	0.4038	0.0038	0.05452	0.00031	0.36123	344.3	2.7	4.7	342.2	1.9	1.9	370	19	36	99.3901	92.4865
Plesovice_7	7413m_TRA_Data 238ReCal 20um April12 data	26.124	132	185400	824	0.11415	54.5334	8623.26	102.326	18.32	0.12	0.05337	0.00045	0.4014	0.0035	0.05464	0.00037	0.45959	342.8	2.5	4.5	342.9	2.3	2.3	344	19	37	100.029	99.6802
Plesovice_8	7413m_TRA_Data 238ReCal 20um April12 data	26.116	132	243200	1075	0.11907	52.7478	32426.7	360	18.27	0.12	0.0539	0.00051	0.4042	0.0037	0.05467	0.00038	0.3152	344.9	2.7	4.7	343.4	2.3	2.3	361	21	37	99.5651	95.1247
Plesovice_9	7413m_TRA_Data 238ReCal 20um April12 data	26.116	131	220800	979	0.118284	51.3372	3978.38	63.0631	18.32	0.11	0.05332	0.00051	0.4017	0.0034	0.05451	0.00031	0.23058	342.8	2.4	4.5	342.4	1.9	1.9	337	22	38	99.8833	101.602
Plesovice_10	7413m_TRA_Data 238ReCal 20um April12 data	26.118	132	207600	921	0.116135	54.0493	6806.56	65.5738	18.41	0.11	0.05372	0.00049	0.4025	0.0036	0.05435	0.00032	0.37515	343.3	2.6	4.6	341.2	2	2	360	20	37	99.3883	94.7778
R33_1	7412m_TRA_Data 238ReCal 20um April12 data	26.115	131	63800	217.8	0.711203	6.98077	1701.33	32	14.6	0.15	0.05496	0.00077	0.5235	0.0079	0.06843	0.00071	0.40714	427.1	5.3	7	426.6	4.3	4.3	404	31	43	99.8829	105.594
R33_2	7412m_TRA_Data 238ReCal 20um April12 data	26.109	131	104400	354.1	1.08698	4.74665	2067.33	31.6832	14.6	0.12	0.0543	0.00066	0.5184	0.0066	0.0686	0.00057	0.45574	423.8	4.4	6.3	427.7	3.4	3.4	389	26	40	100.92	109.949
R33_3	7412m_TRA_Data 238ReCal 20um April12 data	26.116	132	89900	308.3	0.715861	7.02278	1712.38	38.0952	14.65	0.13	0.05582	0.00065	0.5299	0.0069	0.06828	0.0006	0.4814	431.4	4.5	6.5	425.7	3.6	3.6	438	26	40	98.6787	97.1918
R33_4	7412m_TRA_Data 238ReCal 20um April12 data	26.106	132	104200	357.8	1.07518	4.65885	1877.48	27.027	14.62	0.12	0.056	0.00068	0.5328	0.0061	0.06832	0.00057	0.38379	433.4	4	6.1	426	3.4	3.4	452	27	40	98.2926	94.2478
R33_5	7412m_TRA_Data 238ReCal 20um April12 data	26.113	132	118800	405.5	1.11196	4.49557	4658.82	70.5882	14.61	0.11	0.05566	0.00067	0.5283	0.0061	0.06838	0.00054	0.34381	430.4	4	6.1	426.3	3.3	3.3	444	26	40	99.0474	96.0135	0	428.6	1.02	2.5264	2.21798
R33_6	7412m_TRA_Data 238ReCal 20um April12 data	26.129	132	83600	286.7	0.576212	8.73553	1592.38	26.6667	14.62	0.12	0.05595	0.00072	0.5319	0.0066	0.06839	0.00058	0.31286	432.8	4.4	6.4	426.7	3.5	3.5	447	29	43	98.5906	95.4586
R33_7	7412m_TRA_Data 238ReCal 20um April12 data	26.112	132	90500	307.9	0.980513	5.10614	36200	520	14.47	0.13	0.05524	0.00076	0.5302	0.0066	0.06914	0.00059	0.26888	431.6	4.4	6.4	430.9	3.5	3.6	421	30	43	99.8378	102.352
R33_8	7412m_TRA_Data 238ReCal 20um April12 data	26.125	132	99200	339.4	1.04213	4.80737	13226.7	186.667	14.5	0.13	0.05553	0.00068	0.5304	0.0066	0.06888	0.00063	0.40213	431.8	4.4	6.4	429.4	3.8	3.8	433	27	41	99.4442	99.1686
R33_9	7412m_TRA_Data 238ReCal 20um April12 data	26.11	131	88000	302.5	0.986446	5.05853	5333.33	72.7273	14.57	0.12	0.05473	0.00072	0.5206	0.0064	0.06874	0.00058	0.34473	425.3	4.3	6.2	428.6	3.5	3.5	397	29	42	100.776	107.96
R33_10	7412m_TRA_Data 238ReCal 20um April12 data	26.113	131	113400	389	1.11131	4.58186	3978.95	77.193	14.52	0.12	0.05522	0.00069	0.5268	0.0069	0.06896	0.00057	0.51099	429.8	4.7	6.6	429.9	3.4	3.4	418	27	41	100.023	102.847
Temora2_1	7412m_TRA_Data 238ReCal 20um April12 data	26.116	132	116060	391.4	0.436382	11.8141	1459.87	11.6981	14.96	0.11	0.05586	0.00059	0.5181	0.006	0.06684	0.0005	0.45883	423.6	4	6.1	417.1	3.1	3.1	445	24	39	98.4655	93.7303
Temora2_2	7412m_TRA_Data 238ReCal 20um April12 data	26.106	132	124800	425.7	0.475687	10.8459	1512.73	27.8788	14.96	0.12	0.05518	0.00062	0.5063	0.006	0.06691	0.00052	0.41262	415.7	4	6	417.5	3.1	3.2	415	25	40	100.433	100.602
Temora2_3	7412m_TRA_Data 238ReCal 20um April12 data	26.121	131	75120	258	0.433333	12.09	7907.37	76.8421	15.12	0.13	0.05505	0.00077	0.5009	0.0076	0.06618	0.00058	0.32432	411.9	5.1	6.8	413.1	3.5	3.5	411	30	43	100.291	100.511
Temora2_4	7412m_TRA_Data 238ReCal 20um April12 data	26.119	131	80990	278.1	0.640058	8.19146	1603.76	19.2079	14.98	0.14	0.05479	0.00074	0.5065	0.0068	0.06687	0.00064	0.30332	417.3	4.5	6.3	417.2	3.9	3.9	410	30	43	99.976	101.756
Temora2_5	7412m_TRA_Data 238ReCal 20um April12 data	26.119	132	116700	396	0.677525	7.61831	3955.93	37.2881	14.95	0.12	0.05529	0.00077	0.511	0.0062	0.06694	0.00056	0.21461	418.9	4.2	6.1	417.7	3.4	3.4	416	31	43	99.7135	100.409	0	417.97	0.95	2.7581	0.285522
Temora2_6	7412m_TRA_Data 238ReCal 20um April12 data	26.168	132	215400	742.2	0.674347	7.55804	5318.52	79.0123	14.906	0.093	0.05553	0.00053	0.5153	0.0048	0.06705	0.00041	0.32732	422.8	3.1	5.3	418.3	2.5	2.5	433	21	37	98.9357	96.6051
Temora2_7	7412m_TRA_Data 238ReCal 20um April12 data	26.114	131	138200	479.1	0.551868	9.14313	3589.61	38.961	15.07	0.13	0.05555	0.00068	0.5079	0.0057	0.06635	0.00056	0.40264	417.3	4	6.1	414.1	3.4	3.4	432	27	40	99.2332	95.8565
Temora2_8	7412m_TRA_Data 238ReCal 20um April12 data	26.227	132	78400	268.3	0.383899	13.6193	3200	40.8163	14.77	0.14	0.05474	0.00078	0.5116	0.0074	0.06768	0.00066	0.33595	419.6	4.9	6.7	422.1	4	4	399	33	45	100.596	105.789
Temora2_9	7412m_TRA_Data 238ReCal 20um April12 data	26.109	132	90300	307.8	0.671865	7.695	4013.33	48.8889	14.83	0.13	0.05534	0.00068	0.5194	0.0069	0.06733	0.00058	0.32103	424.5	4.6	6.5	420	3.5	3.5	426	29	43	98.9399	98.5915
Temora2_10	7412m_TRA_Data 238ReCal 20um April12 data	26.121	132	61880	213.7	0.448292	11.7289	1275.88	16.2887	14.96	0.14	0.05541	0.00082	0.5118	0.0074	0.06663	0.00065	0.29431	419.8	5	6.8	415.8	3.9	3.9	428	33	45	99.0472	97.1495
Z_91500_1	7412m_TRA_Data 238ReCal 20um April12 data	26.123	132	65400	80.5	0.38236	5.12412	1698.7	28.5714	5.617	0.069	0.0755	0.001	1.851	0.032	0.1782	0.0023	0.64594	1064	11	14	1056	13	13	1078	28	39	99.2481	97.9592
Z_91500_2	7412m_TRA_Data 238ReCal 20um April12 data	26.109	132	63940	78.3	0.376373	5.2621	25576	388	5.534	0.071	0.07501	0.00088	1.865	0.028	0.1809	0.0023	0.6837	1069.3	9.8	13	1072	12	12	1065	24	37	100.253	100.657
Z_91500_3	7412m_TRA_Data 238ReCal 20um April12 data	26.141	132	63500	79.1	0.371049	5.46271	3256.41	51.2821	5.577	0.075	0.07447	0.00094	1.834	0.032	0.1796	0.0024	0.61983	1057	11	14	1065	13	13	1055	25	36	100.757	100.948
Z_91500_4	7412m_TRA_Data 238ReCal 20um April12 data	26.116	131	64800	81.1	0.373983	5.42112	2196.61	33.8983	5.606	0.068	0.075	0.001	1.837	0.027	0.1785	0.0022	0.50996	1057.4	9.6	13	1060	12	12	1066	27	38	100.246	99.4371
Z_91500_5	7412m_TRA_Data 238ReCal 20um April12 data	26.134	132	63900	79.4	0.375693	5.36849	3872.73	66.6667	5.583	0.075	0.0753	0.001	1.868	0.03	0.1785	0.0023	0.55462	1068	11	14	1061	13	13	1076	28	39	99.3446	98.6059
Z_91500_6	7412m_TRA_Data 238ReCal 20um April12 data	26.111	131	63920	81.2	0.374384	5.25226	1404.84	18.4615	5.582	0.072	0.0752	0.001	1.846	0.029	0.1792	0.0024	0.62699	1061	10	14	1063	13	13	1075	26	38	100.189	98.8837
Z_91500_7	7412m_TRA_Data 238ReCal 20um April12 data	26.11	132	62640	80.2	0.37394	5.42625	4640	71.1111	5.584	0.069	0.07482	0.00094	1.847	0.028	0.1793	0.0023	0.55881	1061	10	13	1063	12	12	1062	26	38	100.189	100.094	0	1063	2.63	0.9301	0.0564759
Z_91500_8	7412m_TRA_Data 238ReCal 20um April12 data	26.115	131	63500	81.7	0.374296	5.3963	2152.54	33.8983	5.576	0.068	0.07329	0.00081	1.849	0.031	0.1788	0.0022	0.67688	1062	11	14	1061	12	12	1026	23	37	99.9058	103.411
Z_91500_9	7412m_TRA_Data 238ReCal 20um April12 data	26.114	131	61700	79.3	0.377806	5.29372	3335.14	54.0541	5.586	0.086	0.0757	0.0011	1.878	0.033	0.1797	0.0028	0.65596	1074	12	15	1065	15	15	1084	29	40	99.162	98.2472
Z_91500_10	7412m_TRA_Data 238ReCal 20um April12 data	26.148	132	60780	79.8	0.37619	5.25692	2701.33	43.5556	5.596	0.072	0.0747	0.001	1.832	0.031	0.1789	0.0023	0.57165	1058	11	14	1060	12	12	1057	28	39	100.189	100.284
Z_91500_11	7412m_TRA_Data 238ReCal 20um April12 data	26.114	131	60490	79	0.372025	5.41467	5260	85.2174	5.58	0.078	0.0744	0.0012	1.85	0.031	0.1798	0.0025	0.54892	1062	11	14	1067	14	14	1056	31	42	100.471	101.042
Z_91500_12	7413m_TRA_Data 238ReCal 20um April12 data	26.113	131	59590	80.7	0.372119	5.38718	4109.66	62.7586	5.598	0.08	0.0749	0.001	1.817	0.031	0.1786	0.0026	0.66968	1050	11	14	1059	14	14	1068	27	38	100.857	99.1573
Z_91500_13	7413m_TRA_Data 238ReCal 20um April12 data	26.113	132	59500	80.1	0.37603	5.36504	2087.72	34.386	5.558	0.064	0.07559	0.00088	1.85	0.027	0.1794	0.0021	0.65755	1063.1	9.6	13	1064	11	11	1082	24	37	100.085	98.3364
Z_91500_14	7413m_TRA_Data 238ReCal 20um April12 data	26.108	131	59310	79.6	0.371985	5.23684	10783.6	174.545	5.616	0.077	0.0749	0.00094	1.858	0.032	0.1783	0.0025	0.67221	1065	12	14	1057	14	14	1061	25	37	99.2488	99.623
Z_91500_15	7413m_TRA_Data 238ReCal 20um April12 data	26.119	131	59310	79.9	0.379474	5.35882	6977.65	109.412	5.578	0.061	0.075	0.001	1.866	0.029	0.1797	0.0019	0.49979	1069	10	13	1065	11	11	1069	27	38	99.6258	99.6258
1 concentration uncertainty c.20%
2&3 data not corrected for common-Pb
4 Concordence calculated as (206Pb-238U age/207Pb-235U age)*100
5 Concordance calculated as (206Pb-238U age/207Pb-206Pb age)*100
Decay constants of Jaffey et al. (1971) Precision measurement of half-lives and specific activities of 235U and 238U. Physical Reviews, C 4: 1889-1906.
Uncertainties quoted are Iolite output of 2SE that is expressed at 2 sigma level for internal errors only and 2SE sys represent propagated systematic error (Internal error + Calculated Excess uncertainity) (Paton et al.(2010) Improved laser ablation U-Pb zircon geochronology through robust downhole fractionation correction: G3, 11, doi: 10.1029/2009GC002618.)

## Sheet: 20um15s
Supplementary Data Table A1: U-Pb data for 20 µm spots, 15 sec integration interval
12/04/2018 Mineral Isotope Laser Laboratory (MILL), Texas Tech University										Data for Tera-Wasserburg plot2				Data for Wetherill plot3					Dates (Ma)3									207-235	207-206			Concordia Age (Ma)		%Age Offset
Identifier	Comments	Duration (s)	#points	206Pb cps	U ppm1	Th/U1	U/Pb1	206Pb/204Pb	2SE	238U/206Pb	2SE	207Pb/206Pb	2SE	207Pb/235U	2SE	206Pb/238U	2SE	Rho	207Pb/235U	2s	2ssys	206Pb/238U	2s	2ssys	207Pb/206Pb	2s	2ssys	% Conc4	% Conc5	Rejects	Age	+2SE	MSWD
FC_1_1	7412m_TRA_Data 238ReCal 20um April12 data	13.121	66	680000	740	1.93784	0.969856	10708.7	204.724	5.24	0.04	0.07647	0.00064	2.007	0.015	0.191	0.0015	0.31863	1117.6	5	15	1126.9	7.9	17	1105	17	35	100.832	101.982
FC_1_2	7412m_TRA_Data 238ReCal 20um April12 data	13.11	67	523000	574	1.90592	0.984563	116222	2888.89	5.276	0.047	0.07624	0.0006	1.993	0.022	0.1895	0.0016	0.63521	1112.6	7.4	15	1118.7	8.9	17	1099	16	35	100.548	101.793
FC_1_3	7412m_TRA_Data 238ReCal 20um April12 data	13.119	66	508000	552	1.41486	1.34013	8537.82	168.067	5.225	0.048	0.07541	0.0006	1.989	0.016	0.1916	0.0018	0.67127	1111.5	5.5	15	1130.1	9.5	18	1079	16	34	101.673	104.736
FC_1_4	7412m_TRA_Data 238ReCal 20um April12 data	13.119	66	370600	406.2	1.49754	1.26819	4006.49	64.8649	5.25	0.045	0.07562	0.00074	1.979	0.022	0.1907	0.0016	0.52868	1109	7.2	15	1125.1	8.9	17	1085	19	36	101.452	103.696
FC_1_5	7412m_TRA_Data 238ReCal 20um April12 data	13.108	66	572000	623	2.00803	0.943939	7782.31	163.265	5.165	0.044	0.07622	0.0007	2.025	0.015	0.1936	0.0017	0.36777	1123.7	5.2	15	1141.9	8.8	17	1106	19	37	101.62	103.246		DISCORDANT
FC_1_6	7412m_TRA_Data 238ReCal 20um April12 data	13.127	66	708000	775	1.72	1.09155	18880	162.667	5.222	0.046	0.07609	0.00052	2.001	0.017	0.1913	0.0018	0.65139	1115.6	5.6	15	1128.2	9.7	18	1098	13	32	101.129	102.75
FC_1_7	7412m_TRA_Data 238ReCal 20um April12 data	13.116	66	450200	492.9	1.25441	1.5055	31048.3	282.759	5.247	0.051	0.07601	0.00077	2.003	0.025	0.1906	0.0019	0.5823	1118.2	8.3	16	1125	10	18	1101	21	38	100.608	102.18
FC_1_8	7412m_TRA_Data 238ReCal 20um April12 data	13.113	67	554000	602	1.38704	1.36137	7057.32	140.127	5.158	0.041	0.07549	0.00056	2.015	0.017	0.1941	0.0016	0.64885	1120.4	5.7	15	1143.4	8.4	17	1079	15	34	102.053	105.968
FC_1_9	7412m_TRA_Data 238ReCal 20um April12 data	13.118	66	371300	412.2	0.847162	2.28873	11424.6	163.077	5.312	0.048	0.0756	0.00081	1.968	0.02	0.1885	0.0017	0.4175	1105.5	6.7	15	1113.2	9.2	17	1081	22	38	100.697	102.979
FC_1_10	7412m_TRA_Data 238ReCal 20um April12 data	13.12	66	436000	485.7	0.820877	2.35434	58133.3	746.667	5.264	0.053	0.0765	0.00073	2.001	0.02	0.1903	0.0019	0.59442	1115.4	6.9	15	1123	10	18	1105	19	36	100.681	101.629
Fish_Can_1	7412m_TRA_Data 238ReCal 20um April12 data	13.118	66	186500	840	0.54869	135.048	351.158	6.52632	228.3	4.1	0.0497	0.002	0.0297	0.0013	0.004365	7.5e-05	0.15275	29.7	1.2	1.4	28.08	0.48	0.62	164	87	93	94.5455	17.122
Fish_Can_2	7412m_TRA_Data 238ReCal 20um April12 data	13.115	67	203400	659.7	0.574504	120.383	180	3.75839	221	4.5	0.0466	0.0025	0.0292	0.0015	0.004529	9.3e-05	0.074541	29.2	1.5	1.6	29.13	0.6	0.73	20	110	110	99.7603	145.65
Fish_Can_3	7412m_TRA_Data 238ReCal 20um April12 data	13.116	66	261800	882	0.507937	149.492	11646.7	300	228.7	3.4	0.0477	0.0022	0.0293	0.0013	0.004387	6.5e-05	0.29768	29.3	1.3	1.4	28.22	0.41	0.58	84	98	100	96.314	33.5952
Fish_Can_4	7412m_TRA_Data 238ReCal 20um April12 data	13.104	66	217500	1177	0.681393	107.097	5326.67	77.7778	221.9	3.4	0.0493	0.002	0.0304	0.001	0.004514	6.7e-05	0.10023	30.4	1	1.2	29.03	0.43	0.6	153	86	93	95.4934	18.9739
Fish_Can_5	7413m_TRA_Data 238ReCal 20um April12 data	13.126	67	237800	1077	0.541226	144.564	808.302	15.0943	226.5	2.7	0.0486	0.0016	0.02976	0.00091	0.004415	5e-05	0.029846	29.77	0.9	1.1	28.4	0.32	0.52	139	76	84	95.3981	20.4317	0	28.748	0.15008	2.7788	0.9481
Fish_Can_6	7413m_TRA_Data 238ReCal 20um April12 data	13.173	67	255000	461	0.944685	83.5145	404.255	11.9149	220.8	4.8	0.048	0.0028	0.029	0.0018	0.004518	9.1e-05	0.20696	29	1.7	1.8	29.06	0.59	0.72	80	120	120	100.207	36.325
Fish_Can_7	7413m_TRA_Data 238ReCal 20um April12 data	13.114	66	194200	934	0.507281	144.582	7508	164	225	3.3	0.0473	0.002	0.029	0.0012	0.004443	6.7e-05	0.1359	29	1.1	1.3	28.58	0.43	0.59	54	89	95	98.5517	52.9259
Fish_Can_8	7413m_TRA_Data 238ReCal 20um April12 data	13.125	67	251900	321	1.17757	62.9412	12720	660	223.9	5.2	0.0453	0.0038	0.0277	0.0022	0.00449	0.0001	0.067065	27.7	2.2	2.2	28.88	0.65	0.77	NAN	160	160	104.26	NAN
Fish_Can_9	7413m_TRA_Data 238ReCal 20um April12 data	13.109	66	237300	410	0.815366	90.1099	180.22	5.05495	223.3	5	0.0469	0.0029	0.0297	0.0019	0.00451	0.0001	0.04668	29.7	1.9	2	29.03	0.65	0.77	70	130	130	97.7441	41.4714
Fish_Can_10	7413m_TRA_Data 238ReCal 20um April12 data	13.123	66	214700	631	0.561648	138.377	595.349	15.814	220	3.7	0.0471	0.0019	0.03	0.0012	0.004531	7.9e-05	0.20727	30	1.2	1.4	29.14	0.51	0.66	100	89	95	97.1333	29.14
Plesovice_1	7413m_TRA_Data 238ReCal 20um April12 data	13.11	66	118500	770.4	0.108956	54.5609	53285.7	514.286	18.38	0.18	0.05342	0.00069	0.4034	0.0053	0.05442	0.00055	0.25994	344	3.8	7	341.6	3.3	5.8	346	30	47	99.3023	98.7283
Plesovice_2	7413m_TRA_Data 238ReCal 20um April12 data	13.12	66	135300	839.7	0.114327	53.3143	3418.49	36.9748	18.42	0.15	0.05338	0.00074	0.4022	0.0053	0.05435	0.00045	0.12174	343.2	3.8	7	341.1	2.8	5.5	339	31	47	99.3881	100.619
Plesovice_3	7413m_TRA_Data 238ReCal 20um April12 data	13.115	66	74650	1083.9	0.116339	53.3678	8583.61	104.918	18.58	0.15	0.05316	0.00061	0.3978	0.0047	0.05388	0.00045	0.47514	340	3.4	6.7	338.3	2.7	5.4	331	26	43	99.5	102.205
Plesovice_4	7413m_TRA_Data 238ReCal 20um April12 data	13.124	66	84980	901.1	0.115969	52.8195	12428.6	142.857	18.52	0.18	0.0537	0.00063	0.4035	0.0042	0.05401	0.00055	0.47748	344.1	3.1	6.6	339.1	3.4	5.8	357	27	45	98.5469	94.986
Plesovice_5	7413m_TRA_Data 238ReCal 20um April12 data	13.113	66	116000	997.2	0.115022	52.4842	4617.48	52.4272	18.59	0.15	0.05336	0.00071	0.3956	0.0054	0.05379	0.00044	0.29918	338.4	3.9	7	337.7	2.7	5.4	339	30	46	99.7931	99.6165	2	340.68	0.92202	2.6336	1.062
Plesovice_6	7413m_TRA_Data 238ReCal 20um April12 data	13.117	66	202000	1069	0.121609	47.8943	34000	413.333	18.69	0.16	0.05411	0.00064	0.4037	0.005	0.05356	0.00047	0.35507	344.2	3.6	6.9	336.4	2.9	5.5	379	27	44	97.7339	88.7599
Plesovice_7	7413m_TRA_Data 238ReCal 20um April12 data	13.124	67	143600	802.3	0.113798	53.5939	8263.83	106.383	18.36	0.18	0.0537	0.0007	0.4055	0.0058	0.05447	0.00053	0.50013	345.5	4.2	7.2	341.9	3.3	5.8	361	30	46	98.958	94.7091
Plesovice_8	7413m_TRA_Data 238ReCal 20um April12 data	13.116	66	80790	1046	0.116922	50.925	503800	7200	18.51	0.17	0.05393	0.00072	0.4022	0.0052	0.05404	0.00052	0.31715	343.2	3.7	7	339.3	3.2	5.7	363	30	46	98.8636	93.4711
Plesovice_9	7413m_TRA_Data 238ReCal 20um April12 data	13.116	66	94370	986	0.116734	51.4883	3737.01	42.5197	18.54	0.15	0.05382	0.00077	0.4054	0.0053	0.054	0.00043	0.20483	345.4	3.8	7	339	2.7	5.4	366	34	50	98.1471	92.623
Plesovice_10	7413m_TRA_Data 238ReCal 20um April12 data	13.118	66	64790	892.1	0.114662	52.8495	20447.6	161.905	18.52	0.15	0.0543	0.00062	0.4082	0.0055	0.05404	0.00045	0.4747	347.4	3.9	7.1	339.3	2.7	5.4	383	25	42	97.6684	88.5901
R33_1	7412m_TRA_Data 238ReCal 20um April12 data	13.115	66	16680	222.2	0.742574	6.6072	1029.63	16.2963	14.84	0.2	0.0547	0.0011	0.512	0.011	0.06734	0.00092	0.38087	419.4	7.3	10	420.1	5.5	8	398	43	55	100.167	105.553
R33_2	7412m_TRA_Data 238ReCal 20um April12 data	13.109	66	13410	350.7	1.0807	4.66977	1841.32	24.7934	14.68	0.16	0.05373	0.00091	0.5098	0.0081	0.06814	0.00078	0.32784	418.1	5.5	8.8	424.9	4.7	7.5	357	38	51	101.626	119.02
R33_3	7412m_TRA_Data 238ReCal 20um April12 data	13.116	66	17470	316	0.758228	6.55602	1186.83	14.3713	14.82	0.17	0.0553	0.00078	0.5169	0.0087	0.06749	0.00079	0.55639	422.8	5.8	9.1	421	4.8	7.5	418	32	47	99.5743	100.718
R33_4	7412m_TRA_Data 238ReCal 20um April12 data	13.106	66	23970	358	1.06425	4.66754	1458.82	15.6863	14.69	0.18	0.05574	0.0009	0.5302	0.0083	0.0681	0.00081	0.4103	431.7	5.5	9	424.7	4.9	7.6	455	37	51	98.3785	93.3407
R33_5	7412m_TRA_Data 238ReCal 20um April12 data	13.113	66	21420	408.3	1.09184	4.48189	9459.26	118.519	14.78	0.17	0.0563	0.001	0.523	0.01	0.06768	0.00078	0.38418	428	7	10	422.2	4.7	7.6	454	42	54	98.6449	92.9956	1	423.71	1.46	2.0656	1.05175
R33_6	7412m_TRA_Data 238ReCal 20um April12 data	13.129	66	9500	288	0.572917	8.60729	4881.08	70.2703	14.75	0.18	0.05607	0.00091	0.5289	0.0078	0.06797	0.00082	0.17119	430.9	5.2	8.9	423.9	5	7.7	453	37	51	98.3755	93.5762
R33_7	7412m_TRA_Data 238ReCal 20um April12 data	13.112	66	18770	303.1	0.982184	5.03488	14753.8	230.769	14.6	0.18	0.05507	0.00099	0.5225	0.0089	0.06864	0.00083	0.36959	427.5	5.8	8.9	427.9	5	7.7	412	39	51	100.094	103.859
R33_8	7412m_TRA_Data 238ReCal 20um April12 data	13.125	66	6360	336.4	1.04162	4.80571	6806.45	103.226	14.77	0.18	0.05547	0.00096	0.5192	0.0088	0.06774	0.00084	0.3068	424.3	5.9	9.2	422.5	5.1	7.7	428	40	53	99.5758	98.715
R33_9	7412m_TRA_Data 238ReCal 20um April12 data	13.11	66	8200	297.7	0.989251	5.08889	2341.77	37.9747	14.77	0.17	0.05389	0.00092	0.5015	0.0082	0.06752	0.00084	0.35735	412.5	5.5	8.8	421.2	5.1	7.7	364	37	51	102.109	115.714
R33_10	7412m_TRA_Data 238ReCal 20um April12 data	13.113	66	12800	397			49320	840	14.66	0.17	0.05499	0.00097	0.519	0.01	0.06811	0.00076	0.51508	424	6.8	9.7	424.7	4.6	7.4	414	38	51	100.165	102.585
Temora2_1	7412m_TRA_Data 238ReCal 20um April12 data	13.116	66	69500	370.9	0.439472	11.5725	1549.02	14.3791	14.91	0.18	0.05512	0.00089	0.5087	0.0088	0.06722	0.00081	0.4899	419.2	5.9	9.1	419.4	4.9	7.6	421	36	50	100.048	99.62
Temora2_2	7412m_TRA_Data 238ReCal 20um April12 data	13.106	66	111400	424.8	0.477637	10.5935	1511.73	15.6425	14.77	0.17	0.0546	0.00085	0.5059	0.0075	0.06775	0.0008	0.40796	415.5	5	8.5	422.6	4.8	7.6	389	35	49	101.709	108.638
Temora2_3	7412m_TRA_Data 238ReCal 20um April12 data	13.121	66	99100	236.9	0.429717	11.6757	4035.14	50.2703	15	0.19	0.0556	0.0012	0.505	0.013	0.06671	0.00085	0.33235	415.3	8.5	11	416.3	5.1	7.7	445	50	61	100.241	93.5506
Temora2_4	7412m_TRA_Data 238ReCal 20um April12 data	13.119	66	111600	268.2	0.639075	7.90917	993.918	11.462	14.85	0.21	0.05469	0.00098	0.5096	0.0088	0.06756	0.00093	0.37455	418.9	6.1	9.4	421.4	5.6	8.1	404	37	49	100.597	104.307
Temora2_5	7412m_TRA_Data 238ReCal 20um April12 data	13.119	66	127700	360.5	0.67129	7.4177	15466.7	280	14.67	0.18	0.0541	0.0011	0.5061	0.0086	0.06795	0.00078	0.27771	415.6	5.8	9	423.8	4.7	7.5	375	43	55	101.973	113.013	0	419.46	1.34	1.7174	0.643025
Temora2_6	7412m_TRA_Data 238ReCal 20um April12 data	13.168	66	90300	643.2	0.669621	7.25141	6215.38	92.3077	14.82	0.13	0.05608	0.00068	0.5211	0.0059	0.06749	0.00057	0.35637	425.8	3.9	8	421	3.5	6.8	455	27	43	98.8727	92.5275
Temora2_7	7412m_TRA_Data 238ReCal 20um April12 data	13.114	66	95900	456.7	0.517626	9.39712	7004.88	78.0488	14.83	0.17	0.05487	0.00089	0.5063	0.0079	0.06736	0.00081	0.39494	416.6	5.5	9	420.2	4.9	7.6	399	37	51	100.864	105.313
Temora2_8	7412m_TRA_Data 238ReCal 20um April12 data	13.227	66	105500	258.6	0.384764	13.3025	53860	613.333	14.73	0.19	0.0546	0.001	0.5109	0.0096	0.0679	0.00091	0.31715	418.7	6.5	9.5	423.5	5.5	8	396	45	58	101.146	106.944
Temora2_9	7412m_TRA_Data 238ReCal 20um April12 data	13.109	66	92500	299.3	0.668226	7.44157	2903.69	30.1538	14.77	0.19	0.05527	0.00088	0.5203	0.009	0.06778	0.00091	0.38526	425.1	6	9.2	422.7	5.5	8	427	33	47	99.4354	98.993
Temora2_10	7412m_TRA_Data 238ReCal 20um April12 data	13.121	67	123300	205	0.45561	11.0156	1393.33	12.2581	14.82	0.17	0.05479	0.00096	0.508	0.01	0.06737	0.00084	0.44896	417.7	6.6	9.4	420.2	5.1	7.7	408	37	49	100.599	102.99
Z_91500_1	7412m_TRA_Data 238ReCal 20um April12 data	13.123	67	70840	80.5	0.386832	5.17352	9445.33	88	5.565	0.091	0.075	0.0014	1.858	0.044	0.18	0.003	0.65598	1067	15	20	1067	17	22	1063	40	51	100	100.376
Z_91500_2	7412m_TRA_Data 238ReCal 20um April12 data	13.109	66	68860	78.2	0.372123	5.34518	27544	328	5.5	0.1	0.0749	0.0012	1.868	0.04	0.1812	0.0032	0.65086	1070	14	19	1073	17	22	1065	34	47	100.28	100.751
Z_91500_3	7412m_TRA_Data 238ReCal 20um April12 data	13.141	67	68310	80.3	0.367746	5.46259	6505.71	94.2857	5.65	0.1	0.0747	0.0013	1.83	0.039	0.1763	0.0031	0.5471	1055	14	19	1046	17	22	1053	35	47	99.1469	99.3352
Z_91500_4	7412m_TRA_Data 238ReCal 20um April12 data	13.116	66	69670	80.5	0.378882	5.43919	2533.45	28.7273	5.576	0.084	0.074	0.0015	1.844	0.037	0.1796	0.0028	0.39778	1060	13	19	1065	15	21	1034	40	51	100.472	102.998
Z_91500_5	7412m_TRA_Data 238ReCal 20um April12 data	13.134	66	68510	79.2	0.374621	5.30476	6524.76	80	5.584	0.089	0.0762	0.0013	1.883	0.038	0.1794	0.0028	0.60369	1075	14	19	1066	16	21	1099	33	45	99.1628	96.9973
Z_91500_6	7412m_TRA_Data 238ReCal 20um April12 data	13.111	66	68210	81	0.371358	5.10397	1025.71	13.8346	5.618	0.098	0.0754	0.0012	1.837	0.038	0.1788	0.0031	0.58839	1057	14	19	1060	17	22	1084	33	45	100.284	97.786
Z_91500_7	7412m_TRA_Data 238ReCal 20um April12 data	13.11	66	67600	80.7	0.367906	5.4898	3004.44	44.4444	5.573	0.09	0.0748	0.0012	1.842	0.042	0.1781	0.0028	0.5782	1059	15	20	1059	16	21	1056	34	46	100	100.284	1	1064.2	3.6055	0.90324	0.169428
Z_91500_8	7412m_TRA_Data 238ReCal 20um April12 data	13.115	66	68300	81.4	0.376781	5.37294	15177.8	211.111	5.59	0.081	0.07361	0.00098	1.817	0.038	0.1787	0.0025	0.72227	1052	14	19	1060	13	19	1026	27	41	100.76	103.314
Z_91500_9	7412m_TRA_Data 238ReCal 20um April12 data	13.114	66	66170	79.3	0.378058	5.17962	1675.19	20.5063	5.57	0.12	0.0753	0.0015	1.87	0.04	0.1807	0.0037	0.54918	1071	14	19	1070	20	25	1073	41	52	99.9066	99.7204
Z_91500_10	7412m_TRA_Data 238ReCal 20um April12 data	13.148	67	64880	79	0.378861	5.32345	3932.12	53.9394	5.567	0.095	0.0754	0.0015	1.855	0.048	0.18	0.003	0.47668	1063	17	22	1067	17	22	1075	40	50	100.376	99.2558
Z_91500_11	7412m_TRA_Data 238ReCal 20um April12 data	13.114	66	64950	79.1	0.372187	5.35183	7641.18	87.0588	5.487	0.098	0.0742	0.0014	1.854	0.039	0.1813	0.0034	0.5488	1064	14	19	1076	18	23	1051	42	54	101.128	102.379
Z_91500_12	7413m_TRA_Data 238ReCal 20um April12 data	13.113	66	63260	80.7	0.370012	5.54258	1331.79	19.3684	5.67	0.12	0.0748	0.0015	1.79	0.045	0.1755	0.0036	0.66427	1043	17	21	1042	20	24	1066	40	50	99.9041	97.7486
Z_91500_13	7413m_TRA_Data 238ReCal 20um April12 data	13.113	66	63950	79.6	0.379146	5.2334	1853.62	25.5072	5.594	0.092	0.0759	0.0013	1.857	0.037	0.1786	0.0029	0.63056	1065	13	19	1059	16	21	1090	34	46	99.4366	97.156
Z_91500_14	7413m_TRA_Data 238ReCal 20um April12 data	13.108	66	64000	81.2	0.369458	5.35974	8533.33	113.333	5.62	0.11	0.0747	0.0014	1.863	0.047	0.1786	0.0036	0.68592	1066	17	21	1059	20	24	1053	38	49	99.3433	100.57
Z_91500_15	7413m_TRA_Data 238ReCal 20um April12 data	13.119	66	63320	79.7	0.379799	5.29216	1525.78	20.9639	5.529	0.091	0.0749	0.0015	1.886	0.048	0.1808	0.003	0.57003	1074	17	21	1073	16	21	1061	40	50	99.9069	101.131
1 concentration uncertainty c.20%
2&3 data not corrected for common-Pb
4 Concordence calculated as (206Pb-238U age/207Pb-235U age)*100
5 Concordance calculated as (206Pb-238U age/207Pb-206Pb age)*100
Decay constants of Jaffey et al. (1971) Precision measurement of half-lives and specific activities of 235U and 238U. Physical Reviews, C 4: 1889-1906.
Uncertainties quoted are Iolite output of 2SE that is expressed at 2 sigma level for internal errors only and 2SE sys represent propagated systematic error (Internal error + Calculated Excess uncertainity) (Paton et al.(2010) Improved laser ablation U-Pb zircon geochronology through robust downhole fractionation correction: G3, 11, doi: 10.1029/2009GC002618.)

## Sheet: 20um10s
Supplementary Data Table A1: U-Pb data for 20 µm spots, 10 sec integration interval
12/04/2018 Mineral Isotope Laser Laboratory (MILL), Texas Tech University										Data for Tera-Wasserburg plot2				Data for Wetherill plot3					Dates (Ma)3									207-235	207-206			Concordia Age (Ma)		%Age Offset
Identifier	Comments	Duration (s)	#points	206Pb cps	U ppm1	Th/U1	U/Pb1	206Pb/204Pb	2SE	238U/206Pb	2SE	207Pb/206Pb	2SE	207Pb/235U	2SE	206Pb/238U	2SE	Rho	207Pb/235U	2s	2ssys	206Pb/238U	2s	2ssys	207Pb/206Pb	2s	2ssys	% Conc4	% Conc5	Rejects	Age	+2SE	MSWD
FC_1_1	7412m_TRA_Data 238ReCal 20um April12 data	8.121	40	713600	764	1.93063	0.96343	26928.3	256.604	5.253	0.051	0.07653	0.00076	1.99	0.015	0.1902	0.0018	0.27581	1112	5	5	1122.2	9.5	9.5	1107	20	23	100.917	101.373
FC_1_2	7412m_TRA_Data 238ReCal 20um April12 data	8.11	41	557200	608	1.88651	0.99509	16632.8	229.851	5.315	0.056	0.07614	0.00079	1.97	0.025	0.1883	0.002	0.51279	1104.8	8.6	8.6	1112	11	11	1096	21	24	100.652	101.46
FC_1_3	7412m_TRA_Data 238ReCal 20um April12 data	8.119	41	530600	573	1.41187	1.35718	42448	688	5.257	0.056	0.07567	0.00074	1.986	0.02	0.19	0.0019	0.6286	1110.4	6.9	6.9	1122	10	10	1084	19	23	101.045	103.506
FC_1_4	7412m_TRA_Data 238ReCal 20um April12 data	8.119	41	382200	412	1.49684	1.26458	5835.11	106.87	5.256	0.057	0.07568	0.00092	1.985	0.028	0.1905	0.0021	0.51122	1111.8	9.1	9.1	1124	11	11	1084	24	27	101.097	103.69
FC_1_5	7412m_TRA_Data 238ReCal 20um April12 data	8.108	41	605200	644	2.00466	0.944282	22837.7	313.208	5.175	0.058	0.07568	0.00081	2.007	0.018	0.1935	0.0021	0.40748	1117.8	5.9	5.9	1140	12	12	1084	21	24	101.986	105.166	2	1111.3	2.5456	2.061	1.1192
FC_1_6	7412m_TRA_Data 238ReCal 20um April12 data	8.127	41	717300	780	1.71923	1.09952	12695.6	107.965	5.297	0.062	0.07626	0.00062	1.981	0.02	0.1887	0.0022	0.60827	1108.7	7	7	1114	12	12	1100	16	20	100.478	101.273
FC_1_7	7412m_TRA_Data 238ReCal 20um April12 data	8.116	40	454700	492.6	1.23772	1.52366	6736.3	71.1111	5.291	0.066	0.0753	0.0011	1.968	0.034	0.1889	0.0023	0.53982	1106	12	12	1117	13	13	1087	29	32	100.995	102.76
FC_1_8	7412m_TRA_Data 238ReCal 20um April12 data	8.113	41	583600	623	1.39133	1.37893	6047.67	83.9378	5.199	0.049	0.0759	0.00063	2.021	0.019	0.1925	0.0018	0.584	1122.4	6.3	6.3	1134.9	9.9	9.9	1091	17	20	101.114	104.024
FC_1_9	7412m_TRA_Data 238ReCal 20um April12 data	8.118	41	382800	417.3	0.856219	2.2667	8800	91.954	5.322	0.06	0.0755	0.0011	1.975	0.026	0.1881	0.0021	0.3575	1106.6	8.8	8.8	1111	12	12	1079	29	31	100.398	102.966
FC_1_10	7412m_TRA_Data 238ReCal 20um April12 data	8.12	41	446400	490.3	0.827249	2.33476	14171.4	180.952	5.323	0.071	0.07704	0.00094	1.995	0.022	0.1878	0.0024	0.58326	1113.6	7.4	7.4	1109	13	13	1119	24	27	99.5869	99.1063
Fish_Can_1	7412m_TRA_Data 238ReCal 20um April12 data	8.118	41	16880	843	0.534994	136.851	462.466	11.7808	232.2	5.4	0.0492	0.0024	0.0292	0.0015	0.004306	9.3e-05	0.20622	29.5	1.4	1.4	27.7	0.6	0.6	140	100	100	93.8983	19.7857
Fish_Can_2	7412m_TRA_Data 238ReCal 20um April12 data	8.115	41	13830	648.5	0.568697	114.173	151.148	4.80874	221.9	6.2	0.0482	0.0032	0.0299	0.0019	0.00452	0.00013	0.12893	29.9	1.9	1.9	29.07	0.85	0.85	120	130	130	97.2241	24.225
Fish_Can_3	7412m_TRA_Data 238ReCal 20um April12 data	8.116	41	18340	910	0.495275	153.976	815.111	22.6667	231.9	4.4	0.049	0.0027	0.0292	0.0015	0.004313	7.9e-05	0.084991	29.3	1.5	1.5	27.74	0.51	0.51	130	120	120	94.6758	21.3385
Fish_Can_4	7412m_TRA_Data 238ReCal 20um April12 data	8.104	41	24260	1163.1	0.674061	103.295	471.068	8.54369	224.2	4.8	0.0486	0.0023	0.0298	0.0012	0.004482	9.7e-05	0.054334	29.8	1.2	1.2	28.83	0.62	0.62	130	110	110	96.745	22.1769
Fish_Can_5	7413m_TRA_Data 238ReCal 20um April12 data	8.126	41	22010	1090	0.527523	153.09	620	14.3662	230.1	3	0.0492	0.002	0.0294	0.0011	0.004352	5.7e-05	0.18584	29.4	1.1	1.1	27.99	0.36	0.36	145	88	89	95.2041	19.3034	0	28.384	0.17728	2.9631	-0.330079
Fish_Can_6	7413m_TRA_Data 238ReCal 20um April12 data	8.173	42	10050	478	0.920502	83.8596	744.444	22.2222	222.3	6.3	0.0478	0.0033	0.0293	0.002	0.00449	0.00012	0.13333	29.3	2	2	28.87	0.77	0.77	70	140	140	98.5324	41.2429
Fish_Can_7	7413m_TRA_Data 238ReCal 20um April12 data	8.114	41	19590	960	0.499167	150.706	5597.14	111.429	229.4	3.9	0.0473	0.0024	0.0281	0.0013	0.004372	7.4e-05	0.086324	28.2	1.3	1.3	28.12	0.47	0.47	60	110	110	99.7163	46.8667
Fish_Can_8	7413m_TRA_Data 238ReCal 20um April12 data	8.125	41	7160	346	1.22543	59.8616	367.179	15.3846	224	7.1	0.0455	0.0039	0.0278	0.0027	0.0045	0.00014	0.20716	27.8	2.6	2.6	28.97	0.89	0.89	30	180	180	104.209	96.5667
Fish_Can_9	7413m_TRA_Data 238ReCal 20um April12 data	8.109	41	8630	427.2	0.801732	95.1448	193.933	5.16854	224.5	6.2	0.0469	0.0032	0.0305	0.0024	0.00444	0.00012	0.32837	30.4	2.4	2.4	28.59	0.79	0.79	40	140	140	94.0461	71.475
Fish_Can_10	7413m_TRA_Data 238ReCal 20um April12 data	8.123	41	13530	646	0.552167	138.627	203.459	4.96241	220.6	5.1	0.0478	0.0021	0.0298	0.0014	0.00452	0.00011	0.13964	29.8	1.3	1.3	29.06	0.68	0.68	80	93	94	97.5168	36.325
Plesovice_1	7413m_TRA_Data 238ReCal 20um April12 data	8.11	41	187600	750.2	0.107305	54.8392	6821.82	72.7273	18.43	0.2	0.05248	0.00079	0.3959	0.0058	0.05422	0.00058	0.19907	338.6	4.2	4.2	340.4	3.6	3.6	302	34	36	100.532	112.715
Plesovice_2	7413m_TRA_Data 238ReCal 20um April12 data	8.12	41	201900	806.8	0.112791	53.2541	2571.97	34.3949	18.45	0.18	0.05226	0.00085	0.3918	0.0051	0.05414	0.00054	0.19328	335.6	3.7	3.7	339.9	3.3	3.3	292	37	39	101.281	116.404
Plesovice_3	7413m_TRA_Data 238ReCal 20um April12 data	8.115	41	258400	1043	0.114094	53.4598	5556.99	83.871	18.7	0.23	0.05333	0.00085	0.3971	0.0065	0.05344	0.00071	0.46559	339.5	4.7	4.7	335.6	4.3	4.3	338	36	38	98.8513	99.2899
Plesovice_4	7413m_TRA_Data 238ReCal 20um April12 data	8.124	41	215000	860	0.114302	52.1845	5733.33	85.3333	18.42	0.25	0.05353	0.0009	0.4019	0.0054	0.05427	0.00076	0.40742	343	3.9	3.9	340.7	4.7	4.7	346	38	40	99.3294	98.4682
Plesovice_5	7413m_TRA_Data 238ReCal 20um April12 data	8.113	41	233300	950.5	0.11394	52.1107	7406.35	104.762	18.66	0.16	0.05296	0.00094	0.3947	0.0069	0.05364	0.00046	0.22038	338.5	5.2	5.2	336.8	2.8	2.8	321	40	42	99.4978	104.922	1	338.78	1.035	1.8798	0.498368
Plesovice_6	7413m_TRA_Data 238ReCal 20um April12 data	8.117	41	253000	1028	0.118482	48.2176	6571.43	116.883	18.68	0.19	0.0539	0.00096	0.4008	0.0061	0.05358	0.00055	0.062799	342.1	4.4	4.4	336.4	3.4	3.4	361	39	41	98.3338	93.1856
Plesovice_7	7413m_TRA_Data 238ReCal 20um April12 data	8.124	41	193000	769	0.111573	53.8515	128667	2266.67	18.27	0.19	0.05341	0.00097	0.4062	0.0085	0.05479	0.00058	0.49696	346	6.1	6.1	343.9	3.6	3.6	340	41	43	99.3931	101.147
Plesovice_8	7413m_TRA_Data 238ReCal 20um April12 data	8.116	41	249100	1013	0.115005	51.6837	10167.3	216.327	18.6	0.22	0.05375	0.00089	0.3977	0.0062	0.05373	0.00066	0.35881	339.9	4.5	4.5	337.4	4	4	355	38	40	99.2645	95.0423
Plesovice_9	7413m_TRA_Data 238ReCal 20um April12 data	8.116	40	237100	960	0.113958	52.459	6322.67	128	18.51	0.22	0.0535	0.0011	0.3992	0.0064	0.05409	0.00064	0.15932	340.9	4.6	4.6	339.6	3.9	3.9	349	47	49	99.6187	97.3066
Plesovice_10	7413m_TRA_Data 238ReCal 20um April12 data	8.118	41	214100	867	0.114648	54.1199	28546.7	266.667	18.49	0.22	0.0542	0.00077	0.4063	0.0079	0.05393	0.00059	0.56052	346.1	5.7	5.7	338.6	3.6	3.6	375	32	34	97.833	90.2933
R33_1	7412m_TRA_Data 238ReCal 20um April12 data	8.115	41	68700	217.5	0.754023	6.65138	579.747	11.8143	15.18	0.23	0.0544	0.0014	0.504	0.013	0.066	0.001	0.198	414.1	8.6	8.6	412.1	6.2	6.2	399	59	61	99.517	103.283
R33_2	7412m_TRA_Data 238ReCal 20um April12 data	8.109	41	111700	346.9	1.06227	4.77166	1846.28	34.7107	14.85	0.21	0.0529	0.0012	0.499	0.012	0.06729	0.00099	0.384	410.6	8.1	8.1	419.8	6	6	315	53	54	102.241	133.27
R33_3	7412m_TRA_Data 238ReCal 20um April12 data	8.116	41	99400	314.8	0.76906	6.46407	1390.21	20.979	15.09	0.28	0.0558	0.001	0.515	0.012	0.0662	0.0012	0.64709	421.5	8.2	8.2	413.4	7.2	7.2	436	42	44	98.0783	94.8165
R33_4	7412m_TRA_Data 238ReCal 20um April12 data	8.106	41	111800	350.3	1.05367	4.6336	3440	46.1538	14.91	0.23	0.0564	0.0013	0.531	0.011	0.0672	0.0011	0.35258	431.9	7.2	7.2	419.3	6.4	6.4	469	51	52	97.0827	89.403
R33_5	7412m_TRA_Data 238ReCal 20um April12 data	8.113	41	127100	397.4	1.0848	4.42539	2100.83	38.0165	14.88	0.22	0.0565	0.0014	0.525	0.013	0.06715	0.00096	0.29404	429.8	8.3	8.3	419	5.8	5.8	461	55	56	97.4872	90.8894	0	421.09	1.8275	3.4663	0.426902
R33_6	7412m_TRA_Data 238ReCal 20um April12 data	8.129	41	90800	284.2	0.566854	8.5861	36320	760	14.87	0.23	0.0558	0.0011	0.5202	0.0085	0.0674	0.0011	0.22583	425.2	5.7	5.7	420.6	6.5	6.5	438	45	47	98.9182	96.0274
R33_7	7412m_TRA_Data 238ReCal 20um April12 data	8.112	41	96200	297.7	0.970776	5.0802	5200	135.135	14.6	0.23	0.0544	0.0011	0.525	0.01	0.0687	0.0011	0.4284	428	7	7	428	6.4	6.4	399	48	50	100	107.268
R33_8	7412m_TRA_Data 238ReCal 20um April12 data	8.125	41	103600	327.7	1.03052	4.89836	2690.91	51.9481	15.09	0.24	0.0563	0.0012	0.519	0.011	0.0664	0.0011	0.26204	424.4	7.2	7.2	414.7	6.4	6.4	457	49	50	97.7144	90.744
R33_9	7412m_TRA_Data 238ReCal 20um April12 data	8.11	41	91800	290.6	0.966965	5.18929	5245.71	142.857	15.01	0.27	0.0529	0.0011	0.4872	0.0096	0.0668	0.0012	0.38733	402.8	6.6	6.6	417	7.2	7.2	327	49	51	103.525	127.523
R33_10	7412m_TRA_Data 238ReCal 20um April12 data	8.113	41	127400	396.7	1.11041	4.62354	23163.6	400	14.61	0.17	0.0546	0.0013	0.516	0.013	0.06821	0.0009	0.39475	422.3	9	9	425.3	5.4	5.4	395	55	57	100.71	107.671
Temora2_1	7412m_TRA_Data 238ReCal 20um April12 data	8.116	41	118200	359.8	0.442468	11.3897	949.398	12.0482	14.74	0.29	0.0546	0.0013	0.513	0.011	0.0679	0.0013	0.50412	420.3	7.5	7.5	423.4	7.8	7.8	412	49	51	100.738	102.767
Temora2_2	7412m_TRA_Data 238ReCal 20um April12 data	8.106	41	133400	406.5	0.481673	10.2652	916.838	10.3093	14.75	0.21	0.05446	0.00094	0.511	0.011	0.0678	0.001	0.5305	420.3	7.5	7.5	422.8	6.1	6.1	392	40	43	100.595	107.857
Temora2_3	7412m_TRA_Data 238ReCal 20um April12 data	8.121	40	73150	225.3	0.430093	11.5955	29260	352	15.05	0.23	0.0557	0.0019	0.509	0.016	0.0666	0.001	0.19638	419	11	11	415.7	6.3	6.3	439	74	75	99.2124	94.6925
Temora2_4	7412m_TRA_Data 238ReCal 20um April12 data	8.119	40	83900	255.6	0.649061	7.74545	1055.35	15.0943	14.74	0.22	0.0549	0.0012	0.511	0.012	0.0676	0.0011	0.44555	419	7.8	7.8	421.5	6.7	6.7	402	51	52	100.597	104.851
Temora2_5	7412m_TRA_Data 238ReCal 20um April12 data	8.119	41	110500	338.8	0.655844	7.49558	2027.52	33.0275	14.73	0.23	0.0543	0.0015	0.512	0.013	0.068	0.0011	0.28614	421.1	9.1	9.1	424.3	6.4	6.4	382	59	60	100.76	111.073
Temora2_6	7412m_TRA_Data 238ReCal 20um April12 data	8.168	41	194400	599.9	0.674946	7.23643	4368.54	44.9438	14.75	0.14	0.05598	0.00091	0.5236	0.0068	0.06773	0.00063	0.23776	427.5	4.5	4.5	422.5	3.8	3.8	447	37	39	98.8304	94.519	0	421.76	1.6943	1.1508	1.19487
Temora2_7	7412m_TRA_Data 238ReCal 20um April12 data	8.114	41	139900	433.6	0.501384	9.9222	8478.79	90.9091	14.86	0.23	0.0546	0.0013	0.5076	0.0098	0.0673	0.0011	0.33093	416.7	6.6	6.6	419.6	6.5	6.5	387	51	53	100.696	108.424
Temora2_8	7412m_TRA_Data 238ReCal 20um April12 data	8.227	41	82500	255.5	0.38591	13.2315	1601.94	23.301	14.87	0.31	0.0539	0.0013	0.505	0.013	0.0673	0.0013	0.34723	414.4	9	9	419.8	8	8	377	59	61	101.303	111.353
Temora2_9	7412m_TRA_Data 238ReCal 20um April12 data	8.109	41	93800	288.6	0.670478	7.41902	1477.17	22.0472	14.74	0.25	0.0554	0.0012	0.526	0.013	0.068	0.0012	0.31823	429	8.5	8.5	424.2	7	7	438	54	56	98.8811	96.8493
Temora2_10	7412m_TRA_Data 238ReCal 20um April12 data	8.121	41	65200	199.7	0.454181	11.1253	4206.45	45.8065	14.82	0.23	0.0558	0.0013	0.515	0.014	0.0674	0.001	0.4926	423	10	10	420.7	6.1	6.1	445	48	50	99.4563	94.5393
Z_91500_1	7412m_TRA_Data 238ReCal 20um April12 data	8.123	41	71330	81.3	0.38032	5.17505	12969.1	150.909	5.57	0.12	0.0753	0.0018	1.848	0.056	0.1804	0.0037	0.68366	1061	20	20	1069	20	20	1085	48	49	100.754	98.5253
Z_91500_2	7412m_TRA_Data 238ReCal 20um April12 data	8.109	41	70000	78.6	0.375064	5.23651	1917.81	25.4795	5.49	0.13	0.0746	0.0015	1.865	0.048	0.1807	0.004	0.64826	1071	16	16	1070	22	22	1058	42	44	99.9066	101.134
Z_91500_3	7412m_TRA_Data 238ReCal 20um April12 data	8.141	42	69400	80	0.3675	5.52105	9253.33	186.667	5.66	0.14	0.0747	0.0015	1.825	0.047	0.1762	0.0044	0.53537	1053	17	17	1046	24	24	1055	42	44	99.3352	99.1469
Z_91500_4	7412m_TRA_Data 238ReCal 20um April12 data	8.116	41	70700	80.6	0.379529	5.39491	3625.64	51.2821	5.567	0.087	0.0743	0.0018	1.837	0.043	0.179	0.0028	0.28464	1058	15	15	1061	15	15	1050	47	49	100.284	101.048
Z_91500_5	7412m_TRA_Data 238ReCal 20um April12 data	8.134	41	69800	79.6	0.378266	5.42234	6647.62	95.2381	5.56	0.12	0.0762	0.0017	1.878	0.05	0.18	0.004	0.61194	1075	18	18	1066	22	22	1092	44	46	99.1628	97.619
Z_91500_6	7412m_TRA_Data 238ReCal 20um April12 data	8.111	41	69990	80.6	0.369851	5.03435	669.761	8.13397	5.63	0.13	0.0754	0.0017	1.867	0.041	0.1785	0.004	0.47707	1068	15	15	1058	22	22	1089	44	45	99.0637	97.1534
Z_91500_7	7412m_TRA_Data 238ReCal 20um April12 data	8.11	41	69300	80.6	0.369479	5.50923	2717.65	39.2157	5.57	0.11	0.075	0.0016	1.848	0.061	0.1782	0.0035	0.58227	1064	21	21	1057	19	19	1070	46	47	99.3421	98.785
Z_91500_8	7412m_TRA_Data 238ReCal 20um April12 data	8.115	41	70600	81.8	0.378484	5.45697	5648	63.2	5.56	0.11	0.0734	0.0013	1.843	0.056	0.1792	0.0037	0.72931	1059	20	20	1062	20	20	1021	36	38	100.283	104.016	0	1063.2	4.3383	0.55532	0.0753012
Z_91500_9	7412m_TRA_Data 238ReCal 20um April12 data	8.114	41	67520	79.4	0.3767	5.23057	3140.47	44.6512	5.59	0.15	0.0749	0.0017	1.846	0.047	0.1795	0.0049	0.62787	1066	17	17	1064	27	27	1058	47	48	99.8124	100.567
Z_91500_10	7412m_TRA_Data 238ReCal 20um April12 data	8.148	42	66300	79.3	0.376797	5.34007	2706.12	44.898	5.65	0.13	0.0756	0.0017	1.829	0.061	0.1772	0.0041	0.5509	1057	22	22	1051	22	22	1089	40	41	99.4324	96.5106
Z_91500_11	7412m_TRA_Data 238ReCal 20um April12 data	8.114	40	66280	77.6	0.372938	5.2397	1262.48	16.9524	5.51	0.1	0.0741	0.0018	1.848	0.043	0.1821	0.0034	0.33659	1062	16	16	1078	19	19	1035	50	52	101.507	104.155
Z_91500_12	7413m_TRA_Data 238ReCal 20um April12 data	8.113	41	65260	81	0.369136	5.4878	3035.35	40	5.7	0.15	0.0752	0.002	1.821	0.065	0.1761	0.0047	0.71721	1051	23	23	1045	25	25	1073	51	52	99.4291	97.3905
Z_91500_13	7413m_TRA_Data 238ReCal 20um April12 data	8.113	41	66190	80.6	0.374194	5.29219	5295.2	68.8	5.6	0.13	0.0753	0.0014	1.852	0.048	0.1793	0.0041	0.67874	1063	17	17	1063	23	23	1077	40	42	100	98.7001
Z_91500_14	7413m_TRA_Data 238ReCal 20um April12 data	8.108	40	65650	81.2	0.370197	5.34211	2793.62	36.5957	5.68	0.16	0.0752	0.0018	1.84	0.062	0.1774	0.0049	0.72007	1058	22	22	1052	27	27	1076	47	48	99.4329	97.7695
Z_91500_15	7413m_TRA_Data 238ReCal 20um April12 data	8.119	40	65200	79.4	0.38073	5.30749	1114.53	15.2137	5.51	0.12	0.0747	0.0017	1.887	0.06	0.1808	0.0039	0.66643	1078	20	20	1071	21	21	1068	45	46	99.3506	100.281
1 concentration uncertainty c.20%
2&3 data not corrected for common-Pb
4 Concordence calculated as (206Pb-238U age/207Pb-235U age)*100
5 Concordance calculated as (206Pb-238U age/207Pb-206Pb age)*100
Decay constants of Jaffey et al. (1971) Precision measurement of half-lives and specific activities of 235U and 238U. Physical Reviews, C 4: 1889-1906.
Uncertainties quoted are Iolite output of 2SE that is expressed at 2 sigma level for internal errors only and 2SE sys represent propagated systematic error (Internal error + Calculated Excess uncertainity) (Paton et al.(2010) Improved laser ablation U-Pb zircon geochronology through robust downhole fractionation correction: G3, 11, doi: 10.1029/2009GC002618.)

## Sheet: 20um07s
Supplementary Data Table A1: U-Pb data for 20 µm spots, 7 sec integration interval
12/04/2018 Mineral Isotope Laser Laboratory (MILL), Texas Tech University										Data for Tera-Wasserburg plot2				Data for Wetherill plot3					Dates (Ma)3									207-235	207-206			Concordia Age (Ma)		%Age Offset
Identifier	Comments	Duration (s)	#points	206Pb cps	U ppm1	Th/U1	U/Pb1	206Pb/204Pb	2SE	238U/206Pb	2SE	207Pb/206Pb	2SE	207Pb/235U	2SE	206Pb/238U	2SE	Rho	207Pb/235U	2s	2ssys	206Pb/238U	2s	2ssys	207Pb/206Pb	2s	2ssys	% Conc4	% Conc5	Rejects	Age	+2SE	MSWD
FC_1_1	7412m_TRA_Data 238ReCal 20um April12 data	5.121	25	721800	768	1.94141	0.969697	23665.6	314.754	5.272	0.068	0.07662	0.00086	1.975	0.017	0.1899	0.0025	0.2906	1106.7	5.8	7.6	1121	14	25	1109	23	55	101.292	101.082
FC_1_2	7412m_TRA_Data 238ReCal 20um April12 data	5.11	26	570300	612	1.87582	0.998369	32588.6	440	5.304	0.07	0.0757	0.0012	1.937	0.025	0.1887	0.0025	0.30336	1093.8	8.5	9.8	1114	13	25	1091	28	54	101.847	102.108
FC_1_3	7412m_TRA_Data 238ReCal 20um April12 data	5.119	26	547000	583	1.40309	1.36215	52095.2	952.381	5.275	0.074	0.07627	0.0009	1.972	0.025	0.1892	0.0025	0.71416	1105.7	8.7	9.9	1117	13	25	1105	22	53	101.022	101.086
FC_1_4	7412m_TRA_Data 238ReCal 20um April12 data	5.119	26	395400	422	1.46919	1.27531	3029.89	48.2759	5.247	0.086	0.07622	0.00097	1.965	0.027	0.1909	0.0032	0.67523	1103.5	9.4	11	1126	17	27	1099	26	56	102.039	102.457
FC_1_5	7412m_TRA_Data 238ReCal 20um April12 data	5.108	26	614000	644	2.01553	0.926619	20813.6	338.983	5.147	0.066	0.0757	0.0011	1.997	0.02	0.1945	0.0025	0.32677	1114.2	6.8	8.4	1146	13	25	1085	28	57	102.854	105.622	2	1103	3.0109	3.8891	0.363967
FC_1_6	7412m_TRA_Data 238ReCal 20um April12 data	5.127	25	717100	779	1.72657	1.10653	38762.2	486.486	5.335	0.071	0.07721	0.00076	1.955	0.023	0.1877	0.0025	0.54846	1099.9	8	9.4	1109	14	25	1125	20	54	100.827	98.5778
FC_1_7	7412m_TRA_Data 238ReCal 20um April12 data	5.116	25	455100	492.2	1.22938	1.51028	7281.6	97.6	5.302	0.075	0.0751	0.0012	1.924	0.038	0.1882	0.0028	0.57708	1089	13	14	1112	15	26	1069	32	60	102.112	104.022
FC_1_8	7412m_TRA_Data 238ReCal 20um April12 data	5.113	26	590000	624	1.37821	1.37718	7329.19	124.224	5.176	0.06	0.07611	0.00087	2.008	0.016	0.1929	0.0021	0.32701	1118.1	5.3	7.2	1137	11	24	1096	23	55	101.69	103.741
FC_1_9	7412m_TRA_Data 238ReCal 20um April12 data	5.118	26	385100	416.5	0.862425	2.20604	3277.45	47.6596	5.346	0.08	0.0756	0.0014	1.938	0.032	0.1873	0.0028	0.34248	1094	11	12	1107	15	26	1080	38	63	101.188	102.5
FC_1_10	7412m_TRA_Data 238ReCal 20um April12 data	5.12	26	450500	485	0.836495	2.277	14301.6	266.667	5.324	0.096	0.0774	0.0013	1.991	0.035	0.1882	0.0035	0.60991	1112	12	13	1111	19	28	1128	34	60	99.9101	98.4929
Fish_Can_1	7412m_TRA_Data 238ReCal 20um April12 data	5.118	26	16330	809	0.527812	137.119	403.21	14.0741	230.9		0.0475	0.0031	0.0282	0.0017	0.00432	0.00013	0.2195	28.3	1.7	1.7	27.81	0.81	0.99	100	130	140	98.2686	27.81
Fish_Can_2	7412m_TRA_Data 238ReCal 20um April12 data	5.115	26	13470	637	0.566876	113.75	113.671	5.56962	224.5	9.1	0.0473	0.0043	0.0294	0.0028	0.00446	0.00019	0.22155	29.4	2.7	2.7	28.7	1.2	1.3	50	190	190	97.619	57.4
Fish_Can_3	7412m_TRA_Data 238ReCal 20um April12 data	5.116	26	18490	906	0.486755	155.938	1275.17	48.2759	231.2	5.9	0.0492	0.0028	0.0291	0.0015	0.00434	0.00011	0.22654	29.1	1.5	1.5	27.93	0.71	0.91	140	120	140	95.9794	19.95
Fish_Can_4	7412m_TRA_Data 238ReCal 20um April12 data	5.104	26	24360	1128	0.664007	104.735	560	12.4138	219.4	5.5	0.0478	0.0028	0.0298	0.0012	0.00455	0.00012	0.15454	29.8	1.2	1.2	29.27	0.76	0.96	80	120	130	98.2215	36.5875
Fish_Can_5	7413m_TRA_Data 238ReCal 20um April12 data	5.126	26	21260	1048	0.520038	152.547	477.753	14.6067	230.4	3.4	0.0495	0.0025	0.0295	0.0015	0.004324	7.4e-05	0.2534	29.6	1.5	1.5	27.81	0.47	0.74	160	110	120	93.9527	17.3813	0	28.527	0.23053	3.0928	0.172063
Fish_Can_6	7413m_TRA_Data 238ReCal 20um April12 data	5.173	27	10130	482	0.904564	82.6758	494.146	19.0244	224.5	7.7	0.0488	0.004	0.0304	0.0026	0.00449	0.00015	0.36413	30.4	2.6	2.6	28.85	0.97	1.1	120	170	180	94.9013	24.0417
Fish_Can_7	7413m_TRA_Data 238ReCal 20um April12 data	5.114	26	20010	969	0.498555	151.881	2668	62.6667	228.5	5.1	0.0459	0.003	0.0278	0.0017	0.004389	9.7e-05	0.23104	27.9	1.7	1.7	28.23	0.62	0.84	NAN	130	140	101.183	NAN
Fish_Can_8	7413m_TRA_Data 238ReCal 20um April12 data	5.125	26	7300	341	1.22874	60.461	973.333	60	219.1	8	0.0469	0.0046	0.0285	0.0031	0.0046	0.00017	0.24534	28.5	3	3	29.6	1.1	1.2	80	210	220	103.86	37
Fish_Can_9	7413m_TRA_Data 238ReCal 20um April12 data	5.109	26	8810	430.2	0.785449	92.5161	374.894	15.3191	227.1	8.6	0.0492	0.0048	0.0312	0.0034	0.00441	0.00018	0.26364	31.1	3.3	3.3	28.4	1.2	1.3	130	200	210	91.3183	21.8462
Fish_Can_10	7413m_TRA_Data 238ReCal 20um April12 data	5.123	25	13430	633	0.549921	141.295	526.667	18.4314	219.4	6.8	0.0485	0.0027	0.0309	0.0015	0.00459	0.00014	0.14383	30.9	1.4	1.4	29.49	0.92	1.1	110	120	130	95.4369	26.8091
Plesovice_1	7413m_TRA_Data 238ReCal 20um April12 data	5.11	26	185400	731.3	0.106933	55.7393	4815.58	62.3377	18.36	0.29	0.0515	0.001	0.3923	0.0087	0.05456	0.00086	0.2685	337.5	5.8	6.1	342.5	5.3	8.6	258	46	74	101.481	132.752
Plesovice_2	7413m_TRA_Data 238ReCal 20um April12 data	5.12	26	197700	778.3	0.113581	54.6175	6481.97	108.197	18.34	0.22	0.0519	0.0012	0.3941	0.0085	0.05457	0.00064	0.18861	337.2	6.1	6.5	342.5	3.9	7.8	276	51	76	101.572	124.094
Plesovice_3	7413m_TRA_Data 238ReCal 20um April12 data	5.115	26	253400	997	0.115145	53.1167	8891.23	164.912	18.43	0.34	0.0522	0.001	0.394	0.0084	0.05386	0.00097	0.5098	337.1	6.1	6.5	338.2	5.9	8.9	299	46	76	100.326	113.11
Plesovice_4	7413m_TRA_Data 238ReCal 20um April12 data	5.124	25	209400	824	0.114806	50.8956	10738.5	158.974	18.23	0.29	0.05307	0.00087	0.4035	0.0079	0.05495	0.0009	0.49912	344.1	5.7	6.1	344.8	5.5	8.7	338	40	74	100.203	102.012
Plesovice_5	7413m_TRA_Data 238ReCal 20um April12 data	5.113	25	227300	916.4	0.11447	52.2761	3757.02	44.6281	18.65	0.18	0.0531	0.0011	0.3927	0.0072	0.05366	0.00052	0.26821	336.3	5.3	5.7	336.9	3.2	7.4	328	48	75	100.178	102.713	0	340	1.3066	1.3333	0.860279
Plesovice_6	7413m_TRA_Data 238ReCal 20um April12 data	5.117	26	246800	992	0.115827	48.3902	54844.4	1311.11	18.58	0.24	0.0531	0.0011	0.3947	0.0078	0.05388	0.00069	0.13308	337.7	5.6	6	338.3	4.2	7.9	327	47	73	100.178	103.456
Plesovice_7	7413m_TRA_Data 238ReCal 20um April12 data	5.124	26	188100	733	0.112551	53.5036	5971.43	130.159	18.23	0.25	0.0527	0.0012	0.402	0.011	0.05492	0.00074	0.50943	342.9	7.8	8.1	344.7	4.6	8.2	311	51	76	100.525	110.836
Plesovice_8	7413m_TRA_Data 238ReCal 20um April12 data	5.116	26	241600	959	0.115954	51.5038	5554.02	154.023	18.52	0.3	0.0537	0.0011	0.3976	0.0084	0.05388	0.00081	0.44004	339.8	6.1	6.4	338.3	4.9	8.3	355	46	74	99.5586	95.2958
Plesovice_9	7413m_TRA_Data 238ReCal 20um April12 data	5.116	25	228600	910	0.112967	54.491	457200	11200	18.54	0.37	0.053	0.0017	0.3942	0.0091	0.0541	0.0011	0.15401	337.3	6.7	7	339.4	6.5	9.3	336	69	88	100.623	101.012
Plesovice_10	7413m_TRA_Data 238ReCal 20um April12 data	5.118	26	215500	854	0.114754	54.3949	86200	1080	18.26	0.25	0.054	0.001	0.404	0.01	0.05483	0.00075	0.46486	344.4	7.4	7.7	344.1	4.6	8.2	367	43	71	99.9129	93.7602
R33_1	7412m_TRA_Data 238ReCal 20um April12 data	5.115	25	66700	212.2	0.739868	6.56966	511.111	13.0268	15.34	0.27	0.0554	0.0015	0.501	0.015	0.0653	0.0012	0.38444	412	10	11	407.8	7	11	422	57	79	98.9806	96.6351
R33_2	7412m_TRA_Data 238ReCal 20um April12 data	5.109	26	106800	331	1.0423	4.8605	794.052	20.0743	14.86	0.28	0.0529	0.0016	0.5	0.015	0.0671	0.0012	0.40948	412	10	10	418.6	7.1	11	315	71	92	101.602	132.889
R33_3	7412m_TRA_Data 238ReCal 20um April12 data	5.116	26	98000	295.7	0.795063	6.22526	1430.66	26.2774	14.79	0.4	0.0562	0.0011	0.525	0.015	0.0679	0.0019	0.74751	428.5	9.7	10	423	11	14	457	43	70	98.7165	92.5602
R33_4	7412m_TRA_Data 238ReCal 20um April12 data	5.106	26	110200	338	1.03964	4.55526	4689.36	72.3404	14.72	0.32	0.056	0.0017	0.532	0.015	0.0681	0.0015	0.38389	433.2	9.8	10	424.9	9	12	443	68	87	98.084	95.9142
R33_5	7412m_TRA_Data 238ReCal 20um April12 data	5.113	26	124700	386.7	1.07577	4.43463	1511.52	41.2121	14.84	0.32	0.0556	0.0018	0.521	0.018	0.0673	0.0014	0.39935	426	12	12	419.5	8.5	12	425	75	94	98.4742	98.7059	1	422.29	2.3426	2.0429	0.713093
R33_6	7412m_TRA_Data 238ReCal 20um April12 data	5.129	26	90200	277.5	0.555676	8.46037	36080	1200	14.8	0.28	0.0548	0.0012	0.519	0.01	0.0677	0.0013	0.21575	424.1	7	7.4	422.2	8	12	413	55	82	99.552	102.228
R33_7	7412m_TRA_Data 238ReCal 20um April12 data	5.112	26	93000	284	0.960563	5.18248	8086.96	295.652	14.56	0.27	0.0533	0.0015	0.518	0.016	0.0688	0.0013	0.38545	424	11	11	429	7.6	11	378	67	89	101.179	113.492
R33_8	7412m_TRA_Data 238ReCal 20um April12 data	5.125	26	102200	319.6	1.0072	4.96273	4007.84	113.725	15.17	0.33	0.0569	0.0018	0.521	0.015	0.0661	0.0015	0.081717	425.5	9.9	10	412.8	8.8	12	493	75	95	97.0153	83.7323
R33_9	7412m_TRA_Data 238ReCal 20um April12 data	5.11	25	89300	275.5	0.972051	5.16886	3027.12	118.644	14.84	0.35	0.0532	0.0015	0.5	0.01	0.0676	0.0016	0.23716	411.7	7	7.4	421.6	9.5	13	327	65	87	102.405	128.93
R33_10	7412m_TRA_Data 238ReCal 20um April12 data	5.113	26	123500	380.5	1.10381	4.70334	11761.9	257.143	14.61	0.25	0.0549	0.0016	0.522	0.017	0.0685	0.0012	0.50818	426	11	12	427.4	7	11	400	65	86	100.329	106.85
Temora2_1	7412m_TRA_Data 238ReCal 20um April12 data	5.116	26	116900	351.3	0.441788	11.089	832.028	12.0996	14.68	0.36	0.0551	0.0012	0.507	0.012	0.0684	0.0017	0.35816	416.3	8	8.4	426	10	13	425	51	80	102.33	100.235
Temora2_2	7412m_TRA_Data 238ReCal 20um April12 data	5.106	26	131500	390.5	0.484251	9.81156	1179.37	14.3498	14.37	0.24	0.0543	0.0012	0.516	0.014	0.0691	0.0012	0.51272	422	9.6	9.9	430.6	7.1	11	389	53	80	102.038	110.694
Temora2_3	7412m_TRA_Data 238ReCal 20um April12 data	5.121	25	73000	220.9	0.428248	11.5052	2056.34	30.9859	14.81	0.36	0.0564	0.0018	0.522	0.014	0.0678	0.0017	0.28259	426.4	9.6	9.9	423	10	13	477	73	94	99.2026	88.6792
Temora2_4	7412m_TRA_Data 238ReCal 20um April12 data	5.119	25	83600	251.6	0.649841	7.57831	1276.34	24.4275	14.82	0.37	0.0564	0.0015	0.517	0.013	0.0677	0.0017	0.42562	422.8	8.8	9.1	422	10	13	460	60	82	99.8108	91.7391
Temora2_5	7412m_TRA_Data 238ReCal 20um April12 data	5.119	26	107900	328.8	0.652372	7.45578	1106.67	17.4359	14.79	0.26	0.0557	0.0017	0.524	0.017	0.0677	0.0012	0.28738	427	12	12	422.5	7.1	11	431	69	89	98.9461	98.0278	0	425	1.8958	1.3882	1.97226
Temora2_6	7412m_TRA_Data 238ReCal 20um April12 data	5.168	26	193300	582.2	0.669701	7.26841	1604.15	20.7469	14.72	0.14	0.0564	0.0011	0.5267	0.0077	0.06799	0.00065	0.025885	429.5	5.1	5.7	424	3.9	9.2	475	40	65	98.7194	89.2632
Temora2_7	7412m_TRA_Data 238ReCal 20um April12 data	5.114	26	138400	423.5	0.495868	9.96471	276800	3400	14.81	0.28	0.0543	0.0016	0.501	0.017	0.0671	0.0013	0.43588	412	11	11	418.7	7.6	11	374	66	87	101.626	111.952
Temora2_8	7412m_TRA_Data 238ReCal 20um April12 data	5.227	26	83700	251.5	0.386879	12.8974	1594.29	22.8571	14.53	0.33	0.0539	0.0018	0.51	0.017	0.0687	0.0017	0.32759	418	11	12	428	10	13	374	80	100	102.392	114.439
Temora2_9	7412m_TRA_Data 238ReCal 20um April12 data	5.109	26	92100	281.1	0.675916	7.13452	3759.18	77.551	14.68	0.39	0.0568	0.0019	0.529	0.016	0.0684	0.0018	0.32857	431	11	11	427	11	14	471	74	93	99.0719	90.6582
Temora2_10	7412m_TRA_Data 238ReCal 20um April12 data	5.121	26	65220	195.5	0.459335	10.843	3344.62	46.1538	14.56	0.31	0.0563	0.0017	0.527	0.02	0.0686	0.0014	0.44901	430	13	13	427.4	8.3	12	456	70	90	99.3953	93.7281
Z_91500_1	7412m_TRA_Data 238ReCal 20um April12 data	5.123	26	71400	81	0.379877	5.19231	3320.93	60.4651	5.63	0.14	0.0762	0.0027	1.839	0.071	0.1782	0.0045	0.6075	1058	25	26	1057	25	32	1089	71	87	99.9055	97.0615
Z_91500_2	7412m_TRA_Data 238ReCal 20um April12 data	5.109	26	70400	76.3	0.388991	5.12081	140800	2600	5.44	0.18	0.0742	0.0018	1.869	0.063	0.185	0.0059	0.71655	1074	21	21	1094	32	38	1042	50	71	101.862	104.99
Z_91500_3	7412m_TRA_Data 238ReCal 20um April12 data	5.141	26	71300	80	0.36725	5.54401	1602.25	38.2022	5.57	0.18	0.0743	0.002	1.815	0.067	0.1807	0.0059	0.46271	1049	24	24	1070	32	38	1044	55	75	102.002	102.49
Z_91500_4	7412m_TRA_Data 238ReCal 20um April12 data	5.116	26	72400	81.1	0.380641	5.36731	3712.82	56.4103	5.59	0.13	0.0736	0.0023	1.82	0.059	0.1787	0.004	0.26423	1051	21	22	1060	22	30	1038	68	88	100.856	102.119
Z_91500_5	7412m_TRA_Data 238ReCal 20um April12 data	5.134	26	70800	80.1	0.376904	5.46385	868.712	14.7239	5.54	0.16	0.077	0.0021	1.894	0.066	0.179	0.0053	0.61017	1077	23	23	1061	29	35	1115	56	76	98.5144	95.157
Z_91500_6	7412m_TRA_Data 238ReCal 20um April12 data	5.111	25	70550	80.8	0.37104	4.99382	1000.71	13.3333	5.62	0.18	0.0759	0.0021	1.87	0.052	0.1789	0.0057	0.51999	1069	19	19	1061	31	37	1097	58	78	99.2516	96.7183
Z_91500_7	7412m_TRA_Data 238ReCal 20um April12 data	5.11	26	69600	79.7	0.369009	5.46639	3395.12	63.4146	5.68	0.13	0.0762	0.0024	1.855	0.075	0.1765	0.0039	0.5359	1069	28	28	1048	21	29	1105	66	84	98.0355	94.8416	0	1062.7	5.6176	1.3892	0.028238
Z_91500_8	7412m_TRA_Data 238ReCal 20um April12 data	5.115	26	71190	82.9	0.372497	5.56003	918.581	12.129	5.62	0.16	0.0735	0.0017	1.833	0.074	0.1778	0.0047	0.71678	1055	27	27	1055	26	32	1024	46	68	100	103.027
Z_91500_9	7412m_TRA_Data 238ReCal 20um April12 data	5.114	26	69000	78.5	0.382038	5.12068	2123.08	29.8462	5.49	0.15	0.0744	0.002	1.854	0.052	0.1819	0.0047	0.59292	1068	19	20	1077	26	33	1058	52	71	100.843	101.796
Z_91500_10	7412m_TRA_Data 238ReCal 20um April12 data	5.148	26	67900	79.4	0.377834	5.23401	1718.99	27.8481	5.6	0.18	0.074	0.0024	1.801	0.078	0.1784	0.0057	0.52686	1044	28	29	1064	33	39	1033	69	87	101.916	103.001
Z_91500_11	7412m_TRA_Data 238ReCal 20um April12 data	5.114	25	67400	78.3	0.371392	5.51797	1334.65	19.802	5.51	0.14	0.0741	0.0023	1.865	0.055	0.1822	0.0048	0.32045	1068	20	20	1079	26	33	1036	62	80	101.03	104.151
Z_91500_12	7413m_TRA_Data 238ReCal 20um April12 data	5.113	25	66550	82.4	0.365777	5.56005	1986.57	23.5821	5.69	0.19	0.0765	0.0022	1.867	0.086	0.1755	0.0055	0.82244	1067	30	31	1042	30	36	1101	56	75	97.657	94.6412
Z_91500_13	7413m_TRA_Data 238ReCal 20um April12 data	5.113	26	67540	82	0.367683	5.1186	6432.38	86.6667	5.67	0.13	0.0746	0.0014	1.83	0.054	0.1761	0.0042	0.85624	1055	19	20	1045	23	30	1055	38	63	99.0521	99.0521
Z_91500_14	7413m_TRA_Data 238ReCal 20um April12 data	5.108	25	65300	80.7	0.361214	5.47119	864.901	15.894	5.67	0.2	0.0762	0.0019	1.859	0.066	0.1777	0.0061	0.75566	1065	23	24	1054	33	39	1093	51	72	98.9671	96.4318
Z_91500_15	7413m_TRA_Data 238ReCal 20um April12 data	5.119	25	65770	78.1	0.388988	5.29851	3372.82	48.7179	5.43	0.14	0.0739	0.0023	1.861	0.076	0.1836	0.0044	0.62582	1065	27	27	1086	24	32	1032	62	80	101.972	105.233
1 concentration uncertainty c.20%
2&3 data not corrected for common-Pb
4 Concordence calculated as (206Pb-238U age/207Pb-235U age)*100
5 Concordance calculated as (206Pb-238U age/207Pb-206Pb age)*100
Decay constants of Jaffey et al. (1971) Precision measurement of half-lives and specific activities of 235U and 238U. Physical Reviews, C 4: 1889-1906.
Uncertainties quoted are Iolite output of 2SE that is expressed at 2 sigma level for internal errors only and 2SE sys represent propagated systematic error (Internal error + Calculated Excess uncertainity) (Paton et al.(2010) Improved laser ablation U-Pb zircon geochronology through robust downhole fractionation correction: G3, 11, doi: 10.1029/2009GC002618.)
