# Supplementary material for: Accuracy and precision of U–Pb zircon geochronology at high spatial resolution (7–20 μm spots) by laser ablation-ICP-single-collector-sector-field-mass spectrometry
Source: Royal Society of Chemistry journal article supplement (doi:10.1039/c8ja00321a), 2018-11-21
Supplement: c8ja00321a2.xlsx [file c8ja00321a2.xlsx]

## Sheet: 15um28s
Supplementary Data Table A2: U-Pb data for 15 µm spots, 28 sec integration interval
12/04/2018 Mineral Isotope Laser Laboratory (MILL), Texas Tech University										Data for Tera-Wasserburg plot2				Data for Wetherill plot3					Dates (Ma)3									207-235	207-206			Concordia Age (Ma)		%Age Offset
Identifier	Comments	Duration (s)	#points	206Pb cps	U ppm1	Th/U1	U/Pb1	206Pb/204Pb	2SE	238U/206Pb	2SE	207Pb/206Pb	2SE	207Pb/235U	2SE	206Pb/238U	2SE	Rho	207Pb/235U	2s	2ssys	206Pb/238U	2s	2ssys	207Pb/206Pb	2s	2ssys	% Conc4	% Conc5	Rejects	Age	+2SE	MSWD
FC_1_1	7417_TRA_Data 238ReCal 15um April12 data	26.116	131	144000	305	0.689508	2.54379	32000	622.222	5.178	0.051	0.07834	0.00074	2.069	0.023	0.1931	0.0019	0.59551	1137.6	7.7	14	1138	10	26	1157	19	45	100.035	98.3578
FC_1_2	7417_TRA_Data 238ReCal 15um April12 data	26.128	132	167800	359.5	0.532962	3.5039	335600	4600	5.231	0.053	0.07658	0.00063	2	0.023	0.1907	0.0019	0.71116	1115.4	8	14	1125	10	26	1113	17	45	100.861	101.078
FC_1_3	7417_TRA_Data 238ReCal 15um April12 data	26.219	132	225900	484	0.479339	3.90323	21514.3	885.714	5.146	0.049	0.0766	0.00067	2.026	0.021	0.1945	0.0019	0.55019	1124.2	7	14	1145	10	26	1109	18	45	101.85	103.246
FC_1_4	7417_TRA_Data 238ReCal 15um April12 data	26.119	131	206200	443	0.242889	7.71777	27493.3	440	5.229	0.043	0.07644	0.00062	1.986	0.018	0.1913	0.0016	0.58703	1110.1	6.1	13	1128.4	8.5	25	1103	16	44	101.649	102.303
FC_1_5	7417_TRA_Data 238ReCal 15um April12 data	26.137	132	160400	342	1.3655	1.36255	18870.6	352.941	5.184	0.043	0.0763	0.00068	2.012	0.019	0.1928	0.0016	0.52427	1118.9	6.4	13	1136.4	8.6	26	1101	18	45	101.564	103.215		DISCORDANT
FC_1_6	7417_TRA_Data 238ReCal 15um April12 data	26.12	132	138400	289.8	0.548309	1.02766	182.225	3.15997	5.041	0.053	0.1508	0.0035	4.08	0.11	0.1982	0.0021	0.53721	1648	22	26	1167	11	27	2348	39	52	70.8131	49.7019
FC_1_7	7417_TRA_Data 238ReCal 15um April12 data	26.114	131	157400	340.2	0.42328	4.5973	2645.38	30.2521	5.273	0.049	0.07604	0.00068	1.979	0.019	0.1893	0.0018	0.61014	1108.3	6.7	14	1118.3	9.6	26	1094	18	44	100.902	102.221
FC_1_8	7417_TRA_Data 238ReCal 15um April12 data	26.112	132	140800	307	1.01954	1.81657	5991.49	178.723	5.238	0.052	0.07739	0.00061	2.033	0.022	0.1913	0.0018	0.72716	1127.4	7.1	14	1128	10	26	1129	15	43	100.053	99.9114
FC_1_9	7417_TRA_Data 238ReCal 15um April12 data	26.109	132	103200	221.8	0.335437	3.39663	1250.91	29.0909	5.106	0.05	0.0876	0.0027	2.355	0.073	0.1959	0.002	0.12932	1226	22	25	1153	11	27	1348	58	70	94.0457	85.5341
FC_1_10	7417_TRA_Data 238ReCal 15um April12 data	26.12	132	144000	312	0.320513	2.05263	326.901	13.1669	5.155	0.071	0.1131	0.0073	3.12	0.23	0.1946	0.0026	0.6207	1410	56	57	1146	14	28	1770	110	120	81.2766	64.7458
FishCan_1	7418_TRA_Data 238ReCal 15um April12 data	26.113	132	8980	897	0.673356	113.977	1995.56	55.5556	230.7	3.3	0.0481	0.002	0.0292	0.0011	0.004351	6.4e-05	0.0024615	29.2	1.1	1.2	27.99	0.41	0.77	104	86	95	95.8562	26.9135
FishCan_2	7418_TRA_Data 238ReCal 15um April12 data	26.122	131	8080	806	0.635236	122.121	646.4	19.2	230.8	3.8	0.0494	0.0023	0.0294	0.0013	0.004339	7e-05	0.1784	29.4	1.3	1.4	27.91	0.45	0.79	143	94	100	94.932	19.5175
FishCan_3	7418_TRA_Data 238ReCal 15um April12 data	26.119	132	3623	360	1.5	50.9915	122.814	2.77966	230.8	5	0.0442	0.0035	0.0274	0.0022	0.004352	9.3e-05	0.135	27.4	2.1	2.2	27.99	0.6	0.88	NAN	150	160	102.153	NAN
FishCan_4	7418_TRA_Data 238ReCal 15um April12 data	26.217	132	5090	478	0.805649	90.0188	172.542	7.79661	218.7	3.9	0.045	0.0028	0.0289	0.0018	0.004561	8.1e-05	0.15356	29.1	1.8	1.8	29.33	0.52	0.85	NAN	120	120	100.79	NAN
FishCan_5	7418_TRA_Data 238ReCal 15um April12 data	26.12	132	6640	657	0.529072	146.98	323.902	10.2439	227.5	3.8	0.0499	0.0026	0.031	0.0016	0.004396	7.2e-05	0.060271	31	1.6	1.7	28.28	0.46	0.8	160	110	120	91.2258	17.675	0	28.335	0.16912	3.4805	-0.502142
FishCan_6	7418_TRA_Data 238ReCal 15um April12 data	26.119	132	3450	339	1.50737	51.1312	160.465	6.04651	235.4	6.5	0.0473	0.0036	0.0285	0.0021	0.00424	0.00011	0.01083	28.5	2.1	2.1	27.29	0.73	0.97	60	150	150	95.7544	45.4833
FishCan_7	7418_TRA_Data 238ReCal 15um April12 data	26.116	131	3510	342	1.47953	54.72	88.8608	3.29114	225.5	6.1	0.045	0.0038	0.0275	0.0022	0.00448	0.00013	0.073766	27.5	2.2	2.3	28.8	0.8	1	NAN	160	160	104.727	NAN
FishCan_8	7418_TRA_Data 238ReCal 15um April12 data	26.111	131	2980	283.7	0.69792	103.54	350.588	11.4118	222.6	5.8	0.0468	0.0041	0.029	0.0024	0.0045	0.00012	0.0056142	28.9	2.4	2.4	28.91	0.77	1	NAN	160	160	100.035	NAN
FishCan_9	7418_TRA_Data 238ReCal 15um April12 data	26.163	132	4640	461	0.854664	97.2574	250.811	7.56757	226.9	5.1	0.0499	0.0035	0.0312	0.0021	0.004444	9.3e-05	0.031592	31.1	2	2.1	28.58	0.6	0.89	160	150	150	91.8971	17.8625
FishCan_10	7418_TRA_Data 238ReCal 15um April12 data	26.119	132	3280	342	1.13158	75.8315	2186.67	86.6667	235.1	5.3	0.0475	0.0036	0.0284	0.0021	0.00432	9.6e-05	0.12731	28.6	2.1	2.1	27.79	0.62	0.89	20	140	150	97.1678	138.95
Plsv_1	7418_TRA_Data 238ReCal 15um April12 data	26.114	132	131000	1074	0.127933	49.5845	5574.47	110.638	18.67	0.13	0.0536	0.00056	0.3832	0.0045	0.05356	0.00037	0.38648	329.5	3.3	5.9	336.3	2.3	7.9	348	24	52	102.064	96.6379
Plsv_2	7418_TRA_Data 238ReCal 15um April12 data	26.113	131	102000	828	0.117754	52.2727	3709.09	90.9091	18.52	0.14	0.05337	0.00059	0.3849	0.0046	0.05396	0.00041	0.38353	330.4	3.4	6	338.8	2.5	8	351	25	53	102.542	96.5242
Plsv_3	7418_TRA_Data 238ReCal 15um April12 data	26.115	131	126200	1052	0.119772	52.6527	9348.15	155.556	18.8	0.14	0.05382	0.00059	0.3781	0.0041	0.05321	0.00039	0.317	325.8	3	5.7	334.2	2.4	7.9	362	24	51	102.578	92.3204
Plsv_4	7418_TRA_Data 238ReCal 15um April12 data	26.117	132	131000	1087	0.119963	50.1384	7081.08	145.946	18.77	0.14	0.05421	0.00065	0.3804	0.0046	0.0533	0.00039	0.31597	327.2	3.4	6	334.7	2.4	7.9	374	27	52	102.292	89.492
Plsv_5	7418_TRA_Data 238ReCal 15um April12 data	26.114	131	131000	1102	0.13167	47.7056	3402.6	67.5325	18.75	0.13	0.0542	0.00061	0.3826	0.0039	0.05334	0.00038	0.31201	328.8	2.9	5.7	335	2.3	7.9	380	25	52	101.886	88.1579		DISCORDANT
Plsv_6	7418_TRA_Data 238ReCal 15um April12 data	26.106	132	127900	1065	0.119437	55.1528	28422.2	577.778	18.7	0.13	0.05402	0.00057	0.3808	0.0036	0.05347	0.00036	0.22281	327.5	2.7	5.6	335.8	2.2	7.9	370	23	50	102.534	90.7568
Plsv_7	7418_TRA_Data 238ReCal 15um April12 data	26.115	132	136600	1122	0.122549	51.5388	2652.43	42.7184	18.64	0.14	0.05384	0.00062	0.3849	0.0043	0.0536	0.00039	0.31167	330.5	3.2	5.9	336.6	2.4	8	362	26	53	101.846	92.9834
Plsv_8	7418_TRA_Data 238ReCal 15um April12 data	26.109	132	116000	980	0.117449	52.8017	13647.1	352.941	18.63	0.14	0.0544	0.00067	0.3873	0.0046	0.05365	0.00038	0.30814	332.2	3.4	6	336.9	2.3	8	384	28	53	101.415	87.7344
Plsv_9	7418_TRA_Data 238ReCal 15um April12 data	26.113	132	129200	1088	0.131342	46.7555	6625.64	107.692	18.66	0.12	0.05371	0.00061	0.3892	0.0042	0.05362	0.00035	0.25811	334	3	5.8	336.7	2.1	7.9	362	25	51	100.808	93.011
Plsv_10	7418_TRA_Data 238ReCal 15um April12 data	26.113	132	127200	1066	0.130675	49.9766	6875.68	156.757	18.82	0.14	0.05446	0.0006	0.398	0.0049	0.05319	0.00041	0.50095	340	3.5	6.2	334.1	2.5	7.9	395	24	50	98.2647	84.5823
R33_1	7417_TRA_Data 238ReCal 15um April12 data	26.113	132	49220	311.4	1.11079	4.48703	3175.48	37.4194	15.06	0.17	0.05715	0.00086	0.5301	0.0091	0.06652	0.00076	0.40087	432.5	5.9	8.4	415.1	4.6	10	494	33	55	95.9769	84.0283
R33_2	7417_TRA_Data 238ReCal 15um April12 data	26.126	132	56270	351.7	1.13079	4.51476	3041.62	42.1622	14.7	0.16	0.05564	0.0008	0.5278	0.0083	0.0678	0.00068	0.4846	431	5.5	8.3	422.9	4.1	10	439	32	55	98.1206	96.3326
R33_3	7417_TRA_Data 238ReCal 15um April12 data	26.12	132	52480	329.1	1.09723	4.63521	4198.4	63.2	14.86	0.15	0.0566	0.00089	0.5327	0.0087	0.06738	0.00067	0.30613	433.7	5.7	8.4	420.3	4	10	467	36	58	96.9103	90
R33_4	7417_TRA_Data 238ReCal 15um April12 data	26.114	131	48280	304.9	1.05182	4.87061	19312	296	14.82	0.16	0.0569	0.0011	0.535	0.011	0.06749	0.00072	0.32561	434.1	7	9.3	421.4	4.3	10	480	42	61	97.0744	87.7917
R33_5	7417_TRA_Data 238ReCal 15um April12 data	26.111	132	43080	276.4	0.994211	5.11852	12308.6	260	14.87	0.15	0.0562	0.0011	0.524	0.01	0.06715	0.00067	0.29639	427.5	6.6	8.9	418.9	4.1	10	450	43	62	97.9883	93.0889	1	422.57	1.362	4.0705	0.779871
R33_6	7417_TRA_Data 238ReCal 15um April12 data	26.114	132	45630	289	1.10796	4.58003	1448.57	18.0952	14.79	0.15	0.05603	0.00094	0.5244	0.0093	0.06746	0.0007	0.4019	427.5	6.2	8.7	420.8	4.2	10	442	38	60	98.4327	95.2036
R33_7	7417_TRA_Data 238ReCal 15um April12 data	26.112	131	52470	330.4	1.08626	4.75396	1778.64	26.4407	14.77	0.16	0.05444	0.00087	0.5161	0.0083	0.06771	0.00074	0.34502	422.1	5.6	8.2	422.3	4.4	10	383	37	60	100.047	110.261
R33_8	7417_TRA_Data 238ReCal 15um April12 data	26.128	132	49600	314.5	1.05405	4.84592	3420.69	68.9655	14.73	0.15	0.05497	0.00096	0.5138	0.0089	0.0678	0.00072	0.34233	420.5	6	8.5	422.9	4.3	10	408	39	60	100.571	103.652
R33_9	7418_TRA_Data 238ReCal 15um April12 data	26.119	132	30790	196	0.680102	7.12727	1986.45	45.8065	14.68	0.21	0.055	0.0012	0.519	0.012	0.0683	0.001	0.35161	424.2	7.7	9.8	426.1	6	11	407	48	65	100.448	104.693
R33_10	7418_TRA_Data 238ReCal 15um April12 data	26.118	132	46210	295.9	1.13552	4.61622	4864.21	54.7368	14.95	0.16	0.0563	0.0011	0.5188	0.009	0.0668	0.00076	0.26123	423.8	6	8.5	417.3	4.5	10	477	41	60	98.4663	87.4843
Temo_1	7417_TRA_Data 238ReCal 15um April12 data	26.105	131	19350	122.7	0.441728	11.7416	12900	326.667	15.08	0.22	0.055	0.0015	0.505	0.013	0.06621	0.00097	0.28206	415.6	9	11	413.2	5.8	11	399	59	75	99.4225	103.559
Temo_2	7417_TRA_Data 238ReCal 15um April12 data	26.145	132	35800	219	0.611872	8.48837	1256.14	77.193	14.52	0.2	0.0559	0.0011	0.534	0.011	0.0691	0.00097	0.37768	434.7	7.5	9.8	430.7	5.8	11	444	46	66	99.0798	97.0045
Temo_3	7417_TRA_Data 238ReCal 15um April12 data	26.125	132	43900	270	0.626667	8.01187	12542.9	514.286	14.56	0.18	0.05478	0.00095	0.521	0.01	0.06855	0.00079	0.41914	426.5	6.7	9	427.4	4.8	11	400	39	60	100.211	106.85
Temo_4	7417_TRA_Data 238ReCal 15um April12 data	26.115	132	13780	87.3	0.388889	14.2647	332.048	6.98795	15.1	0.29	0.055	0.0019	0.512	0.02	0.0667	0.0013	0.45807	417	13	15	415.9	7.9	12	382	77	89	99.7362	108.874
Temo_5	7417_TRA_Data 238ReCal 15um April12 data	26.111	131	26200	163	0.588344	9.10615	1027.45	58.8235	14.45	0.23	0.0548	0.0015	0.522	0.014	0.0693	0.0011	0.20937	427.4	9.4	11	432	6.7	12	393	61	75	101.076	109.924
Temo_6	7417_TRA_Data 238ReCal 15um April12 data	26.19	132	33330	210.3	0.597242	8.44578	3174.29	87.619	15.11	0.18	0.0556	0.0012	0.514	0.01	0.06633	0.00076	0.1411	421.8	6.8	9.1	413.9	4.6	10	439	48	66	98.1271	94.2825	1	423.31	1.7132	5.0188	1.56677
Temo_7	7417_TRA_Data 238ReCal 15um April12 data	26.128	131	37600	233	0.607725	8.35125	1319.3	70.1754	14.46	0.19	0.056	0.0011	0.536	0.011	0.06933	0.00091	0.28493	437.5	7	9.3	432.6	5.4	11	457	44	63	98.88	94.6608
Temo_8	7417_TRA_Data 238ReCal 15um April12 data	26.111	132	18530	118.5	0.400675	14.124	861.86	11.1628	15.39	0.2	0.0552	0.0015	0.492	0.013	0.06495	0.00086	0.21463	404.9	9	11	405.6	5.2	10	397	61	76	100.173	102.166
Temo_9	7417_TRA_Data 238ReCal 15um April12 data	26.105	132	26000	164.9	0.463918	11.082	1793.1	54.4828	15.01	0.2	0.0561	0.0013	0.521	0.012	0.06686	0.00088	0.3481	427.5	8.2	10	417.1	5.3	11	448	51	69	97.5673	93.1027
Temo_10	7417_TRA_Data 238ReCal 15um April12 data	26.11	132	33730	211.6	0.715028	7.21938	1568.84	30.6977	14.88	0.2	0.0558	0.001	0.524	0.011	0.0674	0.00091	0.53229	426.7	7.2	9.5	420.4	5.5	11	436	40	60	98.5236	96.422
Z_91500_1	7417_TRA_Data 238ReCal 15um April12 data	26.155	132	35570	81.6	0.367034	5.33333	1205.76	21.6949	5.641	0.089	0.0761	0.0014	1.853	0.041	0.1775	0.0029	0.62932	1066	15	19	1053	16	27	1087	36	54	98.7805	96.8721
Z_91500_2	7417_TRA_Data 238ReCal 15um April12 data	26.312	132	35530	80.1	0.382022	5.30815	2631.85	51.1111	5.57	0.1	0.0746	0.0015	1.853	0.043	0.1802	0.0032	0.5739	1064	15	19	1067	18	29	1064	41	58	100.282	100.282
Z_91500_3	7417_TRA_Data 238ReCal 15um April12 data	26.121	132	35800	81.9	0.369719	5.4491	1835.9	33.3333	5.6	0.11	0.0744	0.0014	1.828	0.04	0.1791	0.0037	0.63395	1054	14	18	1063	20	30	1049	38	55	100.854	101.335
Z_91500_4	7417_TRA_Data 238ReCal 15um April12 data	26.124	132	34540	78.9	0.380482	5.37466	3289.52	60.9524	5.609	0.092	0.0766	0.0015	1.872	0.041	0.1785	0.0029	0.56335	1069	14	18	1058	16	28	1104	39	56	98.971	95.8333
Z_91500_5	7417_TRA_Data 238ReCal 15um April12 data	26.112	132	34160	76.8	0.384635	5.24232	2355.86	46.2069	5.468	0.089	0.0738	0.0014	1.843	0.045	0.1831	0.003	0.5635	1065	16	20	1083	16	28	1032	38	56	101.69	104.942
Z_91500_6	7417_TRA_Data 238ReCal 15um April12 data	26.123	132	34260	80.1	0.373783	5.31167	2740.8	58.4	5.626	0.095	0.0748	0.0013	1.851	0.043	0.1782	0.003	0.63989	1062	15	19	1057	17	28	1058	34	54	99.5292	99.9055	0	1063	3.6533	1.5904	0.0564759
Z_91500_7	7417_TRA_Data 238ReCal 15um April12 data	26.121	132	33980	80.5	0.371801	5.27523	1192.28	24.2105	5.63	0.1	0.0743	0.0014	1.848	0.041	0.1783	0.0033	0.57678	1064	14	18	1057	18	29	1058	38	56	99.3421	99.9055
Z_91500_8	7417_TRA_Data 238ReCal 15um April12 data	26.109	132	33840	79.6	0.373869	5.2996	1276.98	19.6226	5.536	0.094	0.0742	0.0014	1.855	0.04	0.1811	0.0031	0.52399	1068	14	18	1072	17	29	1039	39	58	100.375	103.176
Z_91500_9	7417_TRA_Data 238ReCal 15um April12 data	26.108	132	33380	80.2	0.373317	5.52722	914.521	12.0548	5.633	0.095	0.0745	0.0012	1.846	0.035	0.1777	0.003	0.60338	1061	12	17	1054	17	28	1055	33	52	99.3402	99.9052
Z_91500_10	7418_TRA_Data 238ReCal 15um April12 data	26.13	132	33230	80.4	0.377736	5.2549	886.133	15.2	5.657	0.09	0.0759	0.0014	1.853	0.042	0.177	0.0028	0.64673	1066	15	19	1050	16	27	1089	37	55	98.4991	96.4187
Z_91500_11	7418_TRA_Data 238ReCal 15um April12 data	26.123	131	33000	80.4	0.368159	5.3245	3473.68	52.6316	5.635	0.094	0.0736	0.0014	1.846	0.049	0.177	0.0029	0.61656	1061	17	20	1050	16	28	1022	39	57	98.9632	102.74
Z_91500_12	7418_TRA_Data 238ReCal 15um April12 data	26.119	131	32790	81.2	0.371675	5.74257	3857.65	76.4706	5.598	0.098	0.0747	0.0014	1.839	0.047	0.1787	0.0032	0.66849	1058	17	21	1059	18	29	1058	38	56	100.095	100.095
Z_91500_13	7418_TRA_Data 238ReCal 15um April12 data	26.113	131	32740	77.8	0.387275	4.87774	1190.55	20.3636	5.448	0.086	0.075	0.0013	1.858	0.041	0.184	0.003	0.63129	1069	15	20	1088	16	28	1070	36	54	101.777	101.682
Z_91500_14	7418_TRA_Data 238ReCal 15um April12 data	26.156	132	31790	80.8	0.370668	5.4854	1199.62	19.2453	5.64	0.11	0.076	0.0014	1.852	0.047	0.1788	0.0035	0.65529	1068	16	20	1059	19	30	1092	37	56	99.1573	96.978
Z_91500_15	7418_TRA_Data 238ReCal 15um April12 data	26.12	131	31470	79.9	0.377096	5.35523	1234.12	19.2157	5.6	0.1	0.0744	0.0016	1.848	0.046	0.1787	0.0034	0.5813	1067	17	20	1061	18	29	1051	43	60	99.4377	100.951
1 concentration uncertainty c.20%
2&3 data not corrected for common-Pb
4 Concordence calculated as (206Pb-238U age/207Pb-235U age)*100
5 Concordance calculated as (206Pb-238U age/207Pb-206Pb age)*100
Decay constants of Jaffey et al. (1971) Precision measurement of half-lives and specific activities of 235U and 238U. Physical Reviews, C 4: 1889-1906.
Uncertainties quoted are Iolite output of 2SE that is expressed at 2 sigma level for internal errors only and 2SE sys represent propagated systematic error (Internal error + Calculated Excess uncertainity) (Paton et al.(2010) Improved laser ablation U-Pb zircon geochronology through robust downhole fractionation correction: G3, 11, doi: 10.1029/2009GC002618.)

## Sheet: 15um15s
Supplementary Data Table A2: U-Pb data for 15 µm spots, 15 sec integration interval
12/04/2018 Mineral Isotope Laser Laboratory (MILL), Texas Tech University										Data for Tera-Wasserburg plot2				Data for Wetherill plot3					Dates (Ma)3									207-235	207-206			Concordia Age (Ma)		Age Offset%
Identifier	Comments	Duration (s)	#points	206Pb cps	U ppm1	Th/U1	U/Pb1	206Pb/204Pb	2SE	238U/206Pb	2SE	207Pb/206Pb	2SE	207Pb/235U	2SE	206Pb/238U	2SE	Rho	207Pb/235U	2s	2ssys	206Pb/238U	2s	2ssys	207Pb/206Pb	2s	2ssys	% Conc4	% Conc5	Rejects	Age	+2SE	MSWD
FC_1_1	7417_TRA_Data 238ReCal 15um April12 data	13.116	66	155800	312.9	0.724513	2.40138	4946.03	69.8413	5.266	0.069	0.0805	0.001	2.103	0.032	0.19	0.0026	0.64182	1150	10	26	1121	14	23	1211	26	84	97.4783	92.5681
FC_1_2	7417_TRA_Data 238ReCal 15um April12 data	13.128	66	176300	348.8	0.561353	3.3897	7195.92	118.367	5.237	0.064	0.07642	0.0009	2.01	0.031	0.1914	0.0024	0.66441	1118	10	26	1129	13	22	1102	24	86	100.984	102.45
FC_1_3	7417_TRA_Data 238ReCal 15um April12 data	13.219	67	266200	526	0.522814	3.50667	48400	1363.64	5.206	0.061	0.07663	0.00087	2.007	0.025	0.1912	0.0023	0.52773	1118.6	8.3	25	1128	12	22	1108	23	84	100.84	101.805
FC_1_4	7417_TRA_Data 238ReCal 15um April12 data	13.119	66	219700	436.8	0.242445	7.77224	4724.73	64.5161	5.295	0.061	0.07703	0.0008	1.993	0.028	0.1889	0.0022	0.64496	1113.8	9.8	26	1115	12	22	1119	21	84	100.108	99.6425
FC_1_5	7417_TRA_Data 238ReCal 15um April12 data	13.137	66	171400	343.3	1.51588	1.26028	4232.1	49.3827	5.24	0.059	0.07654	0.00092	2.008	0.026	0.1906	0.0022	0.56517	1117.7	8.9	26	1125	12	22	1106	24	85	100.653	101.718		DISCORDANT
FC_1_6	7417_TRA_Data 238ReCal 15um April12 data	13.12	67	141400	272.5	0.611009	1.09746	210.573	4.02085	5.09	0.074	0.1415	0.0037	3.8	0.12	0.1964	0.0029	0.47946	1594	25	38	1156	16	25	2239	46	85	72.522	51.6302
FC_1_7	7417_TRA_Data 238ReCal 15um April12 data	13.114	66	152500	305.5	0.436334	4.44041	101667	1733.33	5.235	0.073	0.07634	0.00095	1.993	0.026	0.1905	0.0027	0.61445	1112.7	9	26	1124	15	23	1100	25	85	101.016	102.182
FC_1_8	7417_TRA_Data 238ReCal 15um April12 data	13.112	66	161100	324.6	1.18484	1.59352	5281.97	78.6885	5.268	0.067	0.07775	0.00089	2.021	0.032	0.1903	0.0024	0.73603	1122	11	26	1123	13	23	1137	23	84	100.089	98.7687
FC_1_9	7417_TRA_Data 238ReCal 15um April12 data	13.109	66	116100	232.2	0.334625	2.54605	526.531	10.4308	5.175	0.07	0.1005	0.0038	2.72	0.11	0.1934	0.0026	0.25052	1326	30	40	1140	14	23	1615	74	110	85.9729	70.5882
FC_1_10	7417_TRA_Data 238ReCal 15um April12 data	13.12	66	131100	271.6	0.347202	5.13422	4161.9	60.3175	5.388	0.073	0.0787	0.0013	2.023	0.042	0.1858	0.0024	0.42202	1122	14	28	1098	13	22	1157	33	86	97.861	94.9006
FishCan_1	7418_TRA_Data 238ReCal 15um April12 data	13.113	66	10000	939	0.670927	113.133	281.69	7.32394	231.4	4.6	0.0456	0.0026	0.0282	0.0014	0.004326	8.8e-05	0.053998	28.2	1.4	1.7	27.83	0.56	0.75	30	110	140	98.6879	92.7667
FishCan_2	7418_TRA_Data 238ReCal 15um April12 data	13.122	66	9050	839	0.625864	116.852	1206.67	34.6667	230.4	5.3	0.0494	0.0031	0.0296	0.0016	0.00435	0.0001	0.087284	29.6	1.5	1.9	27.95	0.64	0.81	140	130	150	94.4257	19.9643
FishCan_3	7418_TRA_Data 238ReCal 15um April12 data	13.119	66	3630	338.3	1.24328	58.5294	168.837	5.5814	229.2	6.1	0.0455	0.0051	0.0283	0.0032	0.0044	0.00012	0.10099	28.3	3.1	3.3	28.27	0.78	0.92	70	210	220	99.894	40.3857
FishCan_4	7418_TRA_Data 238ReCal 15um April12 data	13.217	67	6320	585	0.670085	105.978	183.188	9.85507	222.8	4.9	0.0473	0.0032	0.029	0.002	0.004492	9.8e-05	0.32009	29	2	2.2	28.89	0.63	0.81	40	140	160	99.6207	72.225
FishCan_5	7418_TRA_Data 238ReCal 15um April12 data	13.12	66	7320	686.7	0.510995	147.677	976	20	229.7	4.4	0.0495	0.0032	0.03	0.0018	0.004364	8e-05	0.0013651	30	1.8	2.1	28.07	0.51	0.72	220	130	160	93.5667	12.7591	0	28.222	0.21634	1.778	-0.89894
FishCan_6	7418_TRA_Data 238ReCal 15um April12 data	13.119	66	3660	341	1.55425	50.8197	209.143	13.1429	231.8	9.2	0.0484	0.0043	0.0287	0.0022	0.00434	0.00017	0.16195	28.7	2.2	2.4	27.9	1.1	1.2	150	170	190	97.2125	18.6
FishCan_7	7418_TRA_Data 238ReCal 15um April12 data	13.116	66	4010	382	1.53141	53.7271	99.0123	4.44444	229.1	7.6	0.0451	0.0047	0.0274	0.0029	0.00431	0.00014	0.10997	27.4	2.9	3	27.71	0.93	1.1	NAN	200	210	101.131	NAN
FishCan_8	7418_TRA_Data 238ReCal 15um April12 data	13.111	66	3300	297.7	0.668458	108.65	81.4815	2.71605	221.3	8	0.0454	0.0057	0.0275	0.0032	0.00452	0.00017	0.19132	28	3.3	3.4	29.1	1.1	1.2	NAN	230	240	103.929	NAN
FishCan_9	7418_TRA_Data 238ReCal 15um April12 data	13.163	66	5130	462	0.6829	128.333	263.077	8.71795	222.4	7	0.0497	0.0049	0.0312	0.003	0.00452	0.00013	0.088754	31.1	3	3.2	29.06	0.83	0.98	120	200	220	93.4405	24.2167
FishCan_10	7418_TRA_Data 238ReCal 15um April12 data	13.119	66	3690	374	1.19786	73.0469	1054.29	48.5714	238.1	7	0.0491	0.0049	0.0277	0.0027	0.00422	0.00013	0.2398	27.7	2.7	2.8	27.15	0.81	0.94	70	190	200	98.0144	38.7857
Plsv_1	7418_TRA_Data 238ReCal 15um April12 data	13.114	67	143900	1118	0.126297	50.1345	4718.03	101.639	18.71	0.19	0.05282	0.00076	0.389	0.006	0.05345	0.00053	0.42297	334.1	4.2	11	335.7	3.2	6.7	319	32	97	100.479	105.235
Plsv_2	7418_TRA_Data 238ReCal 15um April12 data	13.113	66	114800	892	0.113901	51.9511	6957.58	187.879	18.59	0.22	0.05249	0.00077	0.3917	0.0061	0.0539	0.00062	0.39715	335.5	4.5	11	338.4	3.8	7	305	35	100	100.864	110.951
Plsv_3	7418_TRA_Data 238ReCal 15um April12 data	13.115	66	136400	1071	0.118861	53.2836	6994.87	128.205	18.63	0.19	0.05316	0.00082	0.3908	0.006	0.05354	0.00053	0.32267	334.8	4.4	11	336.2	3.2	6.7	329	34	97	100.418	102.188
Plsv_4	7418_TRA_Data 238ReCal 15um April12 data	13.117	66	144200	1137	0.118821	52.0843	16964.7	341.176	18.63	0.2	0.05254	0.00079	0.3889	0.0065	0.05362	0.00057	0.36036	334	4.7	11	336.7	3.5	6.8	303	34	99	100.808	111.122
Plsv_5	7418_TRA_Data 238ReCal 15um April12 data	13.114	66	144100	1137	0.130695	47.5732	7029.27	160.976	18.84	0.2	0.05321	0.00083	0.3918	0.0051	0.05309	0.00059	0.39009	336.1	3.8	11	333.5	3.6	6.8	336	34	96	99.2264	99.256
Plsv_6	7418_TRA_Data 238ReCal 15um April12 data	13.106	66	139900	1106	0.118264	53.9512	3730.67	74.6667	18.71	0.18	0.05344	0.00078	0.3895	0.005	0.05352	0.00052	0.26848	333.9	3.6	11	336.1	3.2	6.7	341	33	98	100.659	98.563	0	335.33	0.95482	1.142	-0.525067
Plsv_7	7418_TRA_Data 238ReCal 15um April12 data	13.115	66	146900	1144	0.120804	50.5971	2511.11	44.4444	18.53	0.19	0.05273	0.00092	0.3909	0.0067	0.05406	0.00055	0.25664	334.8	4.9	11	339.4	3.4	6.8	309	39	100	101.374	109.838
Plsv_8	7418_TRA_Data 238ReCal 15um April12 data	13.109	66	131400	1042	0.11833	51.6609	17520	426.667	18.62	0.21	0.05363	0.00087	0.3944	0.0066	0.05363	0.00059	0.41621	337.4	4.8	11	336.7	3.6	6.9	353	37	100	99.7925	95.3824
Plsv_9	7418_TRA_Data 238ReCal 15um April12 data	13.113	66	142200	1131	0.128205	46.6969	8125.71	188.571	18.83	0.16	0.05321	0.00082	0.3882	0.0055	0.05316	0.00044	0.15916	332.9	4	11	333.9	2.7	6.4	331	35	99	100.3	100.876
Plsv_10	7418_TRA_Data 238ReCal 15um April12 data	13.113	66	139900	1129	0.129938	51.6232	5486.27	109.804	18.96	0.21	0.05323	0.0008	0.3883	0.0071	0.05275	0.00057	0.51598	332.9	5.2	11	331.4	3.5	6.7	342	34	97	99.5494	96.9006
R33_1	7417_TRA_Data 238ReCal 15um April12 data	13.113	66	50980	297.7	1.14243	4.44993	4855.24	59.0476	14.98	0.26	0.0547	0.0012	0.513	0.013	0.0669	0.0012	0.48646	419.5	9	15	417.5	7.1	10	415	48	99	99.5232	100.602
R33_2	7417_TRA_Data 238ReCal 15um April12 data	13.126	66	58780	340.6	1.1515	4.51724	3792.26	50.3226	14.56	0.24	0.05502	0.00094	0.5196	0.0099	0.069	0.0012	0.57174	425.6	6.4	14	429.8	6.9	10	405	39	99	100.987	106.123
R33_3	7417_TRA_Data 238ReCal 15um April12 data	13.12	67	55410	329.4	1.11597	4.699	4818.26	78.2609	14.79	0.19	0.0564	0.0012	0.53	0.012	0.06752	0.00087	0.38676	433.6	7.3	14	421.2	5.3	9	461	47	100	97.1402	91.3666
R33_4	7417_TRA_Data 238ReCal 15um April12 data	13.114	66	51600	308.5	1.05964	4.85063	6070.59	117.647	14.87	0.21	0.0549	0.0015	0.519	0.014	0.06732	0.00094	0.29761	423.7	9.7	16	419.9	5.7	9.2	390	62	110	99.1031	107.667
R33_5	7417_TRA_Data 238ReCal 15um April12 data	13.111	66	48100	289.9	1.00448	5.05934	4182.61	95.6522	15.01	0.16	0.056	0.0016	0.519	0.014	0.06662	0.00068	0.12401	424.1	9.3	15	415.8	4.1	8.3	430	64	110	98.0429	96.6977	0	421.68	1.706	2.5179	0.567613
R33_6	7417_TRA_Data 238ReCal 15um April12 data	13.114	67	46990	277	1.13646	4.5937	1080.23	14.4828	14.81	0.22	0.0568	0.0012	0.535	0.011	0.0676	0.001	0.34222	434.5	7	14	421.7	6.1	9.5	489	42	94	97.0541	86.2372
R33_7	7417_TRA_Data 238ReCal 15um April12 data	13.112	66	55080	324.3	1.10022	4.75513	867.402	12.5984	14.83	0.21	0.0538	0.0013	0.509	0.012	0.0675	0.001	0.20649	416.9	8.3	15	420.9	6	9.4	355	57	110	100.959	118.563
R33_8	7417_TRA_Data 238ReCal 15um April12 data	13.128	66	54400	325.3	1.06425	4.86248	575.661	11.6402	14.69	0.2	0.0548	0.0011	0.521	0.011	0.068	0.00093	0.399	425.5	7.5	15	424.1	5.6	9.2	401	45	99	99.671	105.761
R33_9	7418_TRA_Data 238ReCal 15um April12 data	13.119	67	34300	205.1	0.699171	7.12153	4573.33	106.667	14.8	0.29	0.0544	0.0016	0.516	0.014	0.0674	0.0013	0.28987	421.7	9.4	15	420.5	7.9	11	386	61	110	99.7154	108.938
R33_10	7418_TRA_Data 238ReCal 15um April12 data	13.118	66	47660	290.1	1.14822	4.6416	1733.09	25.0909	14.89	0.24	0.056	0.0016	0.522	0.013	0.067	0.0011	0.20036	425.7	8.8	15	417.8	6.9	10	477	57	99	98.1442	87.5891
Temo_1	7417_TRA_Data 238ReCal 15um April12 data	13.105	66	21750	128.6	0.440124	11.513	820.755	20.7547	15.03	0.31	0.0549	0.0023	0.506	0.021	0.0663	0.0014	0.25518	414	14	19	414	8.5	11	398	96	130	100	104.02
Temo_2	7417_TRA_Data 238ReCal 15um April12 data	13.145	67	46500	269	0.650186	7.91176	650.35	30.7692	14.82	0.29	0.0546	0.0014	0.506	0.012	0.0677	0.0013	0.24428	415.3	7.8	14	422.2	7.9	11	388	60	110	101.661	108.814
Temo_3	7417_TRA_Data 238ReCal 15um April12 data	13.125	66	52700	304	0.632566	7.87565	3400	83.871	14.85	0.21	0.0546	0.0012	0.512	0.011	0.0674	0.00094	0.3652	419.3	7.7	14	420.5	5.7	9.2	391	51	110	100.286	107.545
Temo_4	7417_TRA_Data 238ReCal 15um April12 data	13.115	66	15040	86.4	0.385069	14.0946	613.878	11.0204	14.81	0.43	0.0546	0.0022	0.512	0.022	0.0679	0.0019	0.41737	420	15	20	423	12	14	404	88	130	100.714	104.703
Temo_5	7417_TRA_Data 238ReCal 15um April12 data	13.111	66	33700	195.7	0.641799	8.32766	949.296	42.2535	14.81	0.27	0.0541	0.0018	0.506	0.015	0.0677	0.0012	0.070051	418	10	16	422.2	7.2	10	363	75	120	101.005	116.309	0	419.63	1.9656	2.8191	0.683814
Temo_6	7417_TRA_Data 238ReCal 15um April12 data	13.19	66	37830	222.6	0.627134	8.12409	2802.22	65.1852	15.01	0.22	0.0561	0.0018	0.519	0.015	0.06643	0.00099	0.043045	424	9.7	16	415.4	6.1	9.5	453	70	110	97.9717	91.6998
Temo_7	7417_TRA_Data 238ReCal 15um April12 data	13.128	66	47400	271.4	0.657701	7.98235	2312.2	53.6585	14.49	0.22	0.0552	0.0012	0.526	0.011	0.0691	0.001	0.18793	429	7.3	14	430.8	6.3	9.7	422	48	98	100.42	102.085
Temo_8	7417_TRA_Data 238ReCal 15um April12 data	13.111	66	17910	107.1	0.398693	13.4548	3980	95.5556	15.33	0.33	0.0546	0.0019	0.496	0.016	0.0651	0.0015	0.12065	408	11	16	406.6	8.8	11	383	77	120	99.6569	106.162
Temo_9	7417_TRA_Data 238ReCal 15um April12 data	13.105	66	29860	177.7	0.526168	9.81768	6635.56	111.111	15.18	0.23	0.0575	0.0014	0.525	0.015	0.06596	0.00099	0.22962	429.2	9.5	15	411.7	6	9.3	512	55	110	95.9226	80.4102
Temo_10	7417_TRA_Data 238ReCal 15um April12 data	13.11	66	36810	218.4	0.72207	7.18421	886.988	18.0723	14.77	0.25	0.0557	0.0014	0.525	0.016	0.0678	0.0012	0.58537	427	11	16	423	7	10	423	56	110	99.0632	100
Z_91500_1	7417_TRA_Data 238ReCal 15um April12 data	13.155	66	38490	81.3	0.366913	5.40199	10997.1	160	5.63	0.12	0.0759	0.002	1.842	0.053	0.1782	0.0037	0.52958	1058	19	30	1057	20	27	1077	54	99	99.9055	98.143
Z_91500_2	7417_TRA_Data 238ReCal 15um April12 data	12.578	64	38520	78.6	0.385751	5.15748	5136	89.3333	5.49	0.14	0.0748	0.0021	1.893	0.062	0.1834	0.0047	0.58618	1075	22	32	1085	25	31	1079	56	100	100.93	100.556
Z_91500_3	7417_TRA_Data 238ReCal 15um April12 data	13.121	66	38590	81.1	0.371763	5.35314	637.851	9.58678	5.6	0.14	0.0729	0.0016	1.784	0.057	0.1784	0.0044	0.71384	1036	21	31	1061	23	29	1009	46	98	102.413	105.154
Z_91500_4	7417_TRA_Data 238ReCal 15um April12 data	13.124	66	37460	80.1	0.369663	5.60532	1152.62	16.3077	5.62	0.14	0.0776	0.0019	1.881	0.058	0.1797	0.0043	0.68069	1074	20	31	1064	24	29	1129	50	96	99.0689	94.2427
Z_91500_5	7417_TRA_Data 238ReCal 15um April12 data	13.112	66	37240	78.3	0.378799	5.27984	4965.33	69.3333	5.52	0.14	0.074	0.002	1.864	0.063	0.181	0.0046	0.58555	1071	22	32	1072	25	31	1041	54	97	100.093	102.978
Z_91500_6	7417_TRA_Data 238ReCal 15um April12 data	13.123	66	37750	81.8	0.366748	5.3534	1480.39	21.5686	5.58	0.12	0.0774	0.0018	1.923	0.065	0.18	0.0041	0.67475	1085	23	33	1067	22	28	1148	45	93	98.341	92.9443
Z_91500_7	7417_TRA_Data 238ReCal 15um April12 data	13.121	67	37300	83.2	0.364183	5.58015	1587.23	23.4043	5.74	0.13	0.0737	0.0019	1.785	0.052	0.1743	0.0038	0.56846	1040	18	29	1036	21	27	1033	50	91	99.6154	100.29	0	1064	4.7615	1.3461	0.150602
Z_91500_8	7417_TRA_Data 238ReCal 15um April12 data	13.109	66	35900	78.4	0.379592	5.06787	451.572	5.53459	5.55	0.13	0.074	0.0019	1.879	0.048	0.181	0.0042	0.50345	1074	17	30	1072	23	29	1050	53	100	99.8138	102.095
Z_91500_9	7417_TRA_Data 238ReCal 15um April12 data	13.108	67	35070	78.3	0.385568	5.48319	788.09	11.236	5.61	0.12	0.0753	0.0016	1.846	0.047	0.179	0.0036	0.5451	1060	17	29	1061	20	26	1074	45	97	100.094	98.7896
Z_91500_10	7418_TRA_Data 238ReCal 15um April12 data	13.13	67	35700	81.4	0.377887	5.17154	5492.31	69.2308	5.65	0.12	0.0739	0.0018	1.832	0.061	0.1773	0.0041	0.69255	1053	22	32	1052	22	28	1046	49	97	99.905	100.574
Z_91500_11	7418_TRA_Data 238ReCal 15um April12 data	13.123	66	35070	78.8	0.372462	5.32432	2805.6	32	5.61	0.13	0.0728	0.0019	1.83	0.056	0.1779	0.0041	0.56831	1056	21	32	1058	22	28	1002	50	94	100.189	105.589
Z_91500_12	7418_TRA_Data 238ReCal 15um April12 data	13.119	66	35870	83	0.367229	5.86572	2173.94	30.303	5.58	0.15	0.0756	0.0021	1.855	0.068	0.1776	0.0048	0.62698	1064	24	33	1053	26	32	1067	57	99	98.9662	98.6879
Z_91500_13	7418_TRA_Data 238ReCal 15um April12 data	13.113	66	35070	78.9	0.377567	5.03831	6376.36	81.8182	5.47	0.12	0.0745	0.0018	1.867	0.054	0.1836	0.0042	0.5523	1075	18	28	1086	23	29	1050	51	99	101.023	103.429
Z_91500_14	7418_TRA_Data 238ReCal 15um April12 data	13.156	66	33820	80.6	0.370596	5.49795	7515.56	102.222	5.55	0.15	0.0757	0.0018	1.853	0.063	0.1803	0.005	0.64924	1061	22	32	1068	27	33	1086	51	100	100.66	98.3425
Z_91500_15	7418_TRA_Data 238ReCal 15um April12 data	13.12	66	33290	79.7	0.376788	5.38878	1416.6	19.5745	5.59	0.12	0.076	0.0022	1.842	0.058	0.1782	0.0041	0.46834	1060	21	32	1062	22	27	1083	59	100	100.189	98.0609
1 concentration uncertainty c.20%
2&3 data not corrected for common-Pb
4 Concordence calculated as (206Pb-238U age/207Pb-235U age)*100
5 Concordance calculated as (206Pb-238U age/207Pb-206Pb age)*100
Decay constants of Jaffey et al. (1971) Precision measurement of half-lives and specific activities of 235U and 238U. Physical Reviews, C 4: 1889-1906.
Uncertainties quoted are Iolite output of 2SE that is expressed at 2 sigma level for internal errors only and 2SE sys represent propagated systematic error (Internal error + Calculated Excess uncertainity) (Paton et al.(2010) Improved laser ablation U-Pb zircon geochronology through robust downhole fractionation correction: G3, 11, doi: 10.1029/2009GC002618.)

## Sheet: 15um10s
Supplementary Data Table A2: U-Pb data for 15 µm spots, 10 sec integration interval
12/04/2018 Mineral Isotope Laser Laboratory (MILL), Texas Tech University										Data for Tera-Wasserburg plot2				Data for Wetherill plot3					Dates (Ma)3									207-235	207-206			Concordia Age (Ma)		%Age Offset
Identifier	Comments	Duration (s)	#points	206Pb cps	U ppm1	Th/U1	U/Pb1	206Pb/204Pb	2SE	238U/206Pb	2SE	207Pb/206Pb	2SE	207Pb/235U	2SE	206Pb/238U	2SE	Rho	207Pb/235U	2s	2ssys	206Pb/238U	2s	2ssys	207Pb/206Pb	2s	2ssys	% Conc4	% Conc5	Rejects	Age	+2SE	MSWD
FC_1_1	7417_TRA_Data 238ReCal 15um April12 data	8.116	41	160800	316.3	0.680683	2.51831	21440	333.333	5.301	0.077	0.0809	0.0012	2.114	0.038	0.189	0.0028	0.60424	1153	12	39	1116	15	37	1227	29	96	96.791	90.9535
FC_1_2	7417_TRA_Data 238ReCal 15um April12 data	8.128	41	170600	336.1	0.519786	3.75951	3921.84	82.7586	5.229	0.079	0.0766	0.0013	2.006	0.038	0.1916	0.0029	0.62442	1117	13	38	1130	16	38	1107	33	100	101.164	102.078
FC_1_3	7417_TRA_Data 238ReCal 15um April12 data	8.219	41	268000	523	0.434034	3.90299	35733.3	1600	5.188	0.09	0.0765	0.0012	1.996	0.028	0.1928	0.0032	0.52116	1113.8	9.4	37	1139	18	40	1103	30	98	102.263	103.264
FC_1_4	7417_TRA_Data 238ReCal 15um April12 data	8.119	40	216800	434	0.239171	7.69504	2223.59	48.2051	5.329	0.084	0.07743	0.00089	1.985	0.037	0.1875	0.0031	0.70632	1110	12	38	1108	17	38	1130	23	96	99.8198	98.0531
FC_1_5	7417_TRA_Data 238ReCal 15um April12 data	8.137	41	173100	345.7	1.5013	1.25892	26630.8	415.385	5.242	0.079	0.0763	0.0012	1.996	0.034	0.1902	0.0029	0.5791	1113	11	38	1122	16	38	1100	31	99	100.809	102	3	1113.9	4.3478	2.5742	1.35578
FC_1_6	7417_TRA_Data 238ReCal 15um April12 data	8.12	41	137400	268.4	0.656855	1.17719	198.986	5.64808	5.169	0.092	0.1343	0.0048	3.56	0.13	0.1941	0.0034	0.26539	1537	30	52	1143	19	39	2140	63	100	74.3656	53.4112
FC_1_7	7417_TRA_Data 238ReCal 15um April12 data	8.114	41	147200	292.6	0.477444	4.13861	8411.43	177.143	5.213	0.099	0.0767	0.0012	1.988	0.034	0.1913	0.0037	0.66869	1111	12	38	1128	20	40	1110	31	99	101.53	101.622
FC_1_8	7417_TRA_Data 238ReCal 15um April12 data	8.112	41	162900	323.8	1.22205	1.56199	5340.98	104.918	5.208	0.079	0.0777	0.0011	2.01	0.033	0.1924	0.0029	0.62546	1118	11	38	1134	16	38	1135	28	98	101.431	99.9119
FC_1_9	7417_TRA_Data 238ReCal 15um April12 data	8.109	41	122600	241.3	0.326564	2.09644	382.527	6.86427	5.153	0.092	0.1105	0.0023	3.001	0.071	0.194	0.0034	0.47789	1406	18	44	1143	18	39	1809	35	87	81.2945	63.1841
FC_1_10	7417_TRA_Data 238ReCal 15um April12 data	8.12	41	130800	269.3	0.347939	5.32213	1996.95	42.7481	5.396	0.091	0.0773	0.0014	1.962	0.044	0.1858	0.0031	0.56139	1104	15	38	1098	17	37	1131	36	100	99.4565	97.0822
FishCan_1	7418_TRA_Data 238ReCal 15um April12 data	8.113	41	10430	979	0.681307	121.314	129.565	3.97516	232.1	5.4	0.0466	0.0035	0.0282	0.0018	0.004311	9.6e-05	0.076289	28.2	1.8	2.3	27.73	0.62	1.1	20	150	180	98.3333	138.65
FishCan_2	7418_TRA_Data 238ReCal 15um April12 data	8.122	40	9380	867	0.629758	114.834	341.091	11.6364	231.2	7.1	0.0467	0.004	0.0279	0.002	0.00434	0.00013	0.034969	27.9	2	2.5	27.89	0.82	1.2	70	170	200	99.9642	39.8429
FishCan_3	7418_TRA_Data 238ReCal 15um April12 data	8.119	41	3620	332.8	1.1899	60.7299	804.444	40	225.7	8.6	0.0469	0.0064	0.0298	0.0041	0.00437	0.00017	0.0922	29.7	4.1	4.4	28.1	1.1	1.4	130	270	280	94.6128	21.6154
FishCan_4	7418_TRA_Data 238ReCal 15um April12 data	8.217	41	7210	663	0.656109	114.508	162.022	8.08989	223.8	5.7	0.0457	0.0034	0.0281	0.0023	0.0045	0.00011	0.3093	28.1	2.3	2.7	28.92	0.74	1.2	NAN	150	180	102.918	NAN
FishCan_5	7418_TRA_Data 238ReCal 15um April12 data	8.12	41	7130	679	0.518557	149.231	241.695	5.76271	229.7	5.7	0.0491	0.0043	0.0289	0.0023	0.00436	0.00011	0.12425	28.9	2.2	2.7	28.02	0.72	1.2	240	170	200	96.955	11.675	0	28.144	0.26809	1.528	-1.17284
FishCan_6	7418_TRA_Data 238ReCal 15um April12 data	8.119	41	4040	376	1.54255	53.4851	475.294	36.4706	234	12	0.0471	0.0051	0.0278	0.0023	0.00432	0.00021	0.28829	27.8	2.3	2.7	27.8	1.3	1.6	70	200	210	100	39.7143
FishCan_7	7418_TRA_Data 238ReCal 15um April12 data	8.116	40	4430	421	1.57957	52.4938	118.133	4.8	228.8	9.5	0.0474	0.0054	0.0281	0.0034	0.00434	0.00018	0.095675	28.7	3.2	3.5	27.9	1.1	1.5	110	220	240	97.2125	25.3636
FishCan_8	7418_TRA_Data 238ReCal 15um April12 data	8.111	41	3400	313	0.66869	115.926	73.1183	2.7957	223	9.5	0.0473	0.0074	0.0299	0.0046	0.00453	0.00019	0.12424	29.8	4.5	4.8	29.1	1.2	1.5	20	290	310	97.651	145.5
FishCan_9	7418_TRA_Data 238ReCal 15um April12 data	8.163	41	5170	465	0.635054	137.574	141.644	6.57534	223.7	9.7	0.0536	0.0059	0.0335	0.0035	0.00448	0.00017	0.040171	33.4	3.5	3.9	28.8	1.1	1.5	290	240	260	86.2275	9.93103
FishCan_10	7418_TRA_Data 238ReCal 15um April12 data	8.119	41	3320	343	1.21866	77.0787	245.926	13.3333	240	10	0.046	0.0062	0.0258	0.0036	0.00418	0.00018	0.31555	25.8	3.5	3.8	26.9	1.1	1.4	NAN	240	250	104.264	NAN
Plsv_1	7418_TRA_Data 238ReCal 15um April12 data	8.114	41	152000	1186	0.129174	50.6838	5735.85	109.434	18.83	0.22	0.0531	0.001	0.3851	0.0086	0.05306	0.00064	0.53042	331.9	6.6	17	333.3	3.9	11	327	45	120	100.422	101.927
Plsv_2	7418_TRA_Data 238ReCal 15um April12 data	8.113	40	122100	947	0.114889	53.2022	4983.67	146.939	18.66	0.28	0.05205	0.00099	0.3853	0.0082	0.05358	0.00078	0.31206	330.8	6.1	16	336.5	4.8	12	290	46	120	101.723	116.034
Plsv_3	7418_TRA_Data 238ReCal 15um April12 data	8.115	41	142700	1111	0.119712	53.6715	4530.16	107.937	18.74	0.27	0.0537	0.0011	0.3942	0.007	0.05348	0.00077	0.29709	337.3	5.1	16	335.8	4.7	12	350	45	110	99.5553	95.9429
Plsv_4	7418_TRA_Data 238ReCal 15um April12 data	8.117	41	150400	1189	0.121278	52.8444	3038.38	78.7879	18.8	0.27	0.0529	0.001	0.395	0.008	0.05305	0.00076	0.38719	337.9	5.8	16	333.2	4.6	12	349	46	120	98.6091	95.4728
Plsv_5	7418_TRA_Data 238ReCal 15um April12 data	8.114	40	151200	1204	0.132309	48.16	14400	361.905	18.9	0.22	0.0539	0.001	0.392	0.0069	0.05284	0.00066	0.32594	335.7	5	16	331.9	4	11	361	43	110	98.868	91.9391	0	334.72	1.2289	1.1637	-0.706022
Plsv_6	7418_TRA_Data 238ReCal 15um April12 data	8.106	41	147300	1154	0.118198	55.7488	2916.83	61.3861	18.77	0.24	0.0529	0.0011	0.3874	0.0072	0.05337	0.00066	0.30734	332.4	5.3	16	335.2	4.1	12	326	46	110	100.842	102.822
Plsv_7	7418_TRA_Data 238ReCal 15um April12 data	8.115	41	152800	1196	0.121321	52.4561	4428.99	95.6522	18.65	0.25	0.053	0.0012	0.3935	0.0085	0.05373	0.00074	0.2484	336.8	6.2	17	337.3	4.5	12	320	52	120	100.148	105.406
Plsv_8	7418_TRA_Data 238ReCal 15um April12 data	8.109	41	138600	1087	0.121067	52.767	3422.22	93.8272	18.67	0.28	0.0535	0.0011	0.3937	0.0074	0.05354	0.00075	0.35361	336.9	5.4	16	336.2	4.6	12	350	49	120	99.7922	96.0571
Plsv_9	7418_TRA_Data 238ReCal 15um April12 data	8.113	41	148800	1186	0.127487	48.4082	4076.71	109.589	18.89	0.19	0.05344	0.00092	0.3962	0.007	0.053	0.00053	0.40831	338.8	5.1	16	332.9	3.3	11	342	39	110	98.2586	97.3392
Plsv_10	7418_TRA_Data 238ReCal 15um April12 data	8.113	41	143800	1158	0.131088	51.6964	4050.7	101.408	18.86	0.29	0.05312	0.00094	0.3916	0.009	0.05301	0.00079	0.53572	335.3	6.6	17	332.9	4.9	12	336	42	120	99.2842	99.0774
R33_1	7417_TRA_Data 238ReCal 15um April12 data	8.113	41	51120	299.1	1.10064	4.60154	1099.35	17.6344	15.12	0.33	0.0554	0.0014	0.507	0.017	0.0664	0.0015	0.60116	416	12	21	414.6	8.9	16	429	59	120	99.6635	96.6434
R33_2	7417_TRA_Data 238ReCal 15um April12 data	8.126	41	59800	342.8	1.11902	4.58902	10872.7	218.182	14.5	0.32	0.0553	0.0013	0.513	0.014	0.0693	0.0015	0.57569	423.7	9.8	21	431.9	9.1	17	416	53	120	101.935	103.822
R33_3	7417_TRA_Data 238ReCal 15um April12 data	8.12	41	57800	340.7	1.08394	4.81215	1243.01	30.1075	14.92	0.25	0.0569	0.0014	0.525	0.014	0.067	0.0012	0.37996	428.3	9.2	21	419.4	6.9	15	479	55	120	97.922	87.5574
R33_4	7417_TRA_Data 238ReCal 15um April12 data	8.114	41	53700	320.8	1.02618	4.89024	4669.57	113.043	14.94	0.25	0.055	0.0019	0.506	0.016	0.0671	0.0011	0.23627	419	11	21	418.5	6.8	15	411	76	130	99.8807	101.825
R33_5	7417_TRA_Data 238ReCal 15um April12 data	8.111	41	50800	302.1	0.990732	5.1641	1167.82	29.8851	14.98	0.23	0.0562	0.002	0.513	0.017	0.0667	0.00096	0.10632	420	12	22	416.2	5.8	15	440	81	130	99.0952	94.5909	0	419.21	2.2024	1.5744	-0.0214643
R33_6	7417_TRA_Data 238ReCal 15um April12 data	8.114	41	46760	276	1.12174	4.83363	1183.8	21.7722	14.82	0.3	0.0569	0.0014	0.519	0.016	0.0675	0.0014	0.51037	424	11	21	420.9	8.3	16	491	52	110	99.2689	85.723
R33_7	7417_TRA_Data 238ReCal 15um April12 data	8.112	41	56000	328.8	1.08516	4.78603	794.326	14.1844	14.86	0.3	0.0524	0.0016	0.493	0.015	0.0673	0.0014	0.12243	406	10	20	420.1	8.5	16	302	73	130	103.473	139.106
R33_8	7417_TRA_Data 238ReCal 15um April12 data	8.128	41	56500	337	1.04866	4.84892	837.037	22.2222	14.81	0.23	0.0551	0.0013	0.512	0.013	0.0677	0.0011	0.39022	421.3	8.3	19	422.2	6.4	15	416	50	110	100.214	101.49
R33_9	7418_TRA_Data 238ReCal 15um April12 data	8.119	41	35900	216.7	0.684818	7.27181	865.06	21.4458	14.8	0.34	0.0537	0.002	0.498	0.018	0.0673	0.0016	0.27285	410	12	22	419.7	9.9	17	337	85	130	102.366	124.54
R33_10	7418_TRA_Data 238ReCal 15um April12 data	8.118	41	48400	291.8	1.14256	4.82314	1225.32	27.8481	14.77	0.3	0.056	0.0023	0.511	0.017	0.0677	0.0015	0.12573	418	12	22	422.1	8.8	16	427	88	130	100.981	98.8525
Temo_1	7417_TRA_Data 238ReCal 15um April12 data	8.105	40	23330	134.8	0.432047	12.2434	1333.14	32.5714	15.03	0.34	0.0535	0.0027	0.489	0.026	0.0669	0.0015	0.34064	403	17	25	417.1	9	16	320	110	150	103.499	130.344
Temo_2	7417_TRA_Data 238ReCal 15um April12 data	8.145	42	52200	301	0.665781	7.96296	648.447	21.118	14.93	0.32	0.0545	0.0018	0.501	0.015	0.067	0.0013	0.22924	411.8	9.9	21	418	8.2	16	374	74	130	101.506	111.765
Temo_3	7417_TRA_Data 238ReCal 15um April12 data	8.125	41	56000	323.4	0.627087	7.92647	2604.65	46.0465	15.05	0.23	0.0543	0.0015	0.501	0.013	0.0666	0.001	0.33891	412.4	8.5	20	415.6	6.2	15	384	58	110	100.776	108.229
Temo_4	7417_TRA_Data 238ReCal 15um April12 data	8.115	41	15210	87.3	0.366667	14.5017	1322.61	31.3043	14.73	0.58	0.0558	0.0025	0.504	0.026	0.0689	0.0026	0.33423	413	18	25	429	16	21	456	98	140	103.874	94.0789
Temo_5	7417_TRA_Data 238ReCal 15um April12 data	8.111	40	37900	215.9	0.667902	8.40078	1284.75	37.2881	14.77	0.32	0.0548	0.0021	0.507	0.018	0.0678	0.0015	0.1708	416	12	22	422.7	9.1	16	401	80	130	101.611	105.411	0	417.53	2.3304	1.8181	0.179951
Temo_6	7417_TRA_Data 238ReCal 15um April12 data	8.19	41	39850	230.3	0.647416	7.94138	1350.85	28.4746	15.04	0.26	0.0571	0.0024	0.519	0.019	0.0665	0.0011	-0.0026446	424	13	23	415.1	6.8	15	467	95	140	97.9009	88.8865
Temo_7	7417_TRA_Data 238ReCal 15um April12 data	8.128	41	50220	290.4	0.64084	8.36888	1826.18	28.3636	14.59	0.28	0.0563	0.0014	0.52	0.014	0.0683	0.0012	0.2846	425	9.4	21	425.7	7.3	15	454	57	120	100.165	93.7665
Temo_8	7417_TRA_Data 238ReCal 15um April12 data	8.111	41	16990	101.5	0.384236	14.176	3775.56	104.444	15.24	0.46	0.053	0.0027	0.487	0.023	0.0662	0.002	0.066831	401	16	24	413	12	18	320	110	150	102.993	129.062
Temo_9	7417_TRA_Data 238ReCal 15um April12 data	8.105	41	30980	186.2	0.556928	9.26368	4130.67	78.6667	15.4	0.28	0.0578	0.0021	0.512	0.018	0.0651	0.0012	0.10095	419	12	22	406.8	7.5	15	534	78	130	97.0883	76.1798
Temo_10	7417_TRA_Data 238ReCal 15um April12 data	8.11	41	38440	222	0.714865	7.16129	904.471	13.1765	14.71	0.31	0.0557	0.0016	0.52	0.017	0.0683	0.0014	0.4776	425	11	22	425.7	8.7	16	426	64	120	100.165	99.9296
Z_91500_1	7417_TRA_Data 238ReCal 15um April12 data	8.155	41	39050	81.4	0.369165	5.40505	2366.67	40.6061	5.68	0.16	0.077	0.0022	1.855	0.076	0.1765	0.0048	0.65855	1066	26	43	1048	26	41	1121	55	110	98.3114	93.488
Z_91500_2	7417_TRA_Data 238ReCal 15um April12 data	8.136	41	39190	78.6	0.384733	5.17105	4610.59	97.6471	5.47	0.18	0.0747	0.0027	1.884	0.077	0.1845	0.0059	0.53146	1072	27	44	1091	32	46	1082	69	110	101.772	100.832
Z_91500_3	7417_TRA_Data 238ReCal 15um April12 data	8.121	41	39480	81.2	0.369212	5.43507	602.748	10.5344	5.55	0.18	0.071	0.0023	1.754	0.083	0.1798	0.0058	0.73485	1030	29	44	1065	32	45	968	68	120	103.398	110.021
Z_91500_4	7417_TRA_Data 238ReCal 15um April12 data	8.124	41	37920	80.6	0.37134	5.52055	1131.94	21.4925	5.63	0.2	0.0774	0.0022	1.893	0.073	0.1797	0.006	0.72704	1080	25	42	1065	33	46	1138	57	110	98.6111	93.5852
Z_91500_5	7417_TRA_Data 238ReCal 15um April12 data	8.112	41	37990	78.4	0.382526	5.27946	8442.22	142.222	5.49	0.17	0.0746	0.0025	1.891	0.081	0.183	0.0059	0.54363	1074	29	45	1083	32	46	1056	63	110	100.838	102.557
Z_91500_6	7417_TRA_Data 238ReCal 15um April12 data	8.123	41	38540	82.6	0.367312	5.27796	1352.28	19.2982	5.64	0.14	0.0773	0.0021	1.882	0.076	0.1774	0.0042	0.65702	1076	28	45	1052	23	40	1129	53	100	97.7695	93.1798
Z_91500_7	7417_TRA_Data 238ReCal 15um April12 data	8.121	41	38510	82.5	0.370303	5.57432	1974.87	40.5128	5.67	0.14	0.0728	0.0021	1.784	0.058	0.1765	0.0044	0.49513	1042	22	43	1047	24	40	996	59	110	100.48	105.12
Z_91500_8	7417_TRA_Data 238ReCal 15um April12 data	8.109	41	35730	76.9	0.372822	5.04924	643.784	11.1712	5.52	0.17	0.0744	0.0025	1.909	0.066	0.183	0.0056	0.53963	1082	23	42	1082	31	45	1038	69	120	100	104.239
Z_91500_9	7417_TRA_Data 238ReCal 15um April12 data	8.108	41	35470	77.7	0.381725	5.51064	716.566	13.7374	5.61	0.13	0.0746	0.002	1.851	0.061	0.1782	0.0037	0.57834	1062	22	42	1057	20	38	1069	55	110	99.5292	98.8775	1	1063.7	6.2756	1.6938	0.122364
Z_91500_10	7418_TRA_Data 238ReCal 15um April12 data	8.13	41	36070	83.2	0.370433	5.2163	8015.56	120	5.71	0.18	0.0748	0.0022	1.797	0.074	0.1755	0.005	0.7434	1046	26	43	1042	27	42	1061	62	110	99.6176	98.2092
Z_91500_11	7418_TRA_Data 238ReCal 15um April12 data	8.123	41	35120	79.1	0.373198	5.36999	2006.86	29.1429	5.6	0.16	0.0727	0.0022	1.794	0.072	0.1791	0.0049	0.68012	1045	27	45	1061	27	42	994	60	110	101.531	106.74
Z_91500_12	7418_TRA_Data 238ReCal 15um April12 data	8.119	41	36270	84.3	0.3707	5.97872	630.783	10.4348	5.59	0.17	0.0767	0.0028	1.843	0.09	0.1774	0.0062	0.64146	1062	34	50	1052	34	47	1098	72	120	99.0584	95.8106
Z_91500_13	7418_TRA_Data 238ReCal 15um April12 data	8.113	41	35450	78.1	0.390013	5.09791	3082.61	57.3913	5.38	0.17	0.0751	0.0021	1.918	0.059	0.1865	0.0057	0.54845	1086	21	41	1102	31	46	1060	56	110	101.473	103.962
Z_91500_14	7418_TRA_Data 238ReCal 15um April12 data	8.156	41	34260	79.3	0.37831	5.1527	1161.36	22.0339	5.44	0.17	0.0746	0.0023	1.855	0.09	0.1836	0.006	0.69575	1066	31	45	1091	32	45	1046	61	110	102.345	104.302
Z_91500_15	7418_TRA_Data 238ReCal 15um April12 data	8.12	41	32930	80.1	0.372409	5.6014	1780	31.3514	5.76	0.19	0.0764	0.0029	1.82	0.072	0.1745	0.0056	0.45452	1050	26	44	1036	30	44	1100	75	120	98.6667	94.1818
1 concentration uncertainty c.20%
2&3 data not corrected for common-Pb
4 Concordence calculated as (206Pb-238U age/207Pb-235U age)*100
5 Concordance calculated as (206Pb-238U age/207Pb-206Pb age)*100
Decay constants of Jaffey et al. (1971) Precision measurement of half-lives and specific activities of 235U and 238U. Physical Reviews, C 4: 1889-1906.
Uncertainties quoted are Iolite output of 2SE that is expressed at 2 sigma level for internal errors only and 2SE sys represent propagated systematic error (Internal error + Calculated Excess uncertainity) (Paton et al.(2010) Improved laser ablation U-Pb zircon geochronology through robust downhole fractionation correction: G3, 11, doi: 10.1029/2009GC002618.)

## Sheet: 15um07s
Supplementary Data Table A2: U-Pb data for 15 µm spots, 07 sec integration interval
12/04/2018 Mineral Isotope Laser Laboratory (MILL), Texas Tech University										Data for Tera-Wasserburg plot2				Data for Wetherill plot3					Dates (Ma)3									207-235	207-206			Concordia Age (Ma)		%Age Offset
Identifier	Comments	Duration (s)	#points	206Pb cps	U ppm1	Th/U1	U/Pb1	206Pb/204Pb	2SE	238U/206Pb	2SE	207Pb/206Pb	2SE	207Pb/235U	2SE	206Pb/238U	2SE	Rho	207Pb/235U	2s	2ssys	206Pb/238U	2s	2ssys	207Pb/206Pb	2s	2ssys	% Conc4	% Conc5	Rejects	Age	+2SE	MSWD
FC_1_1	7417_TRA_Data 238ReCal 15um April12 data	5.116	26	159700	314.8	0.654701	2.59308	7097.78	151.111	5.3	0.11	0.0804	0.0017	2.15	0.054	0.1892	0.0039	0.60785	1164	17	43	1117	21	22	1202	43	110	95.9622	92.9285
FC_1_2	7417_TRA_Data 238ReCal 15um April12 data	5.128	26	164100	326.7	0.513315	3.81659	14269.6	304.348	5.23	0.1	0.0754	0.0016	1.988	0.044	0.1907	0.0035	0.4893	1111	15	41	1125	19	20	1082	45	120	101.26	103.974
FC_1_3	7417_TRA_Data 238ReCal 15um April12 data	5.219	26	239500	474	0.278481	5.32584	68428.6	2314.29	5.17	0.12	0.0757	0.0014	2.003	0.04	0.1942	0.0044	0.51812	1116	14	40	1144	24	24	1095	43	120	102.509	104.475
FC_1_4	7417_TRA_Data 238ReCal 15um April12 data	5.119	25	207800	416	0.238221	7.92381	3552.14	78.6325	5.281	0.094	0.0769	0.0012	2.002	0.043	0.1897	0.0035	0.63105	1116	15	40	1120	19	19	1115	32	110	100.358	100.448
FC_1_5	7417_TRA_Data 238ReCal 15um April12 data	5.137	26	169800	344.1	1.46178	1.29167	7897.67	153.488	5.3	0.13	0.0762	0.0017	1.993	0.046	0.1893	0.0045	0.52081	1112	16	41	1118	24	25	1107	49	120	100.54	100.994	4	1115.5	5.7917	1.3876	1.50136
FC_1_6	7417_TRA_Data 238ReCal 15um April12 data	5.12	26	129500	255.5	0.711546	1.22837	244.109	5.46654	5.18	0.12	0.1239	0.004	3.31	0.13	0.1939	0.0046	0.51844	1487	32	55	1142	25	25	2017	58	110	76.7989	56.6187
FC_1_7	7417_TRA_Data 238ReCal 15um April12 data	5.114	25	140700	282.4	0.502125	4.05165	2325.62	36.3636	5.26	0.14	0.0768	0.0015	1.982	0.049	0.191	0.0053	0.71841	1108	17	41	1127	29	29	1112	41	110	101.715	101.349
FC_1_8	7417_TRA_Data 238ReCal 15um April12 data	5.112	26	156200	315.8	1.26346	1.53899	34711.1	777.778	5.261	0.092	0.0771	0.0015	2.006	0.038	0.1904	0.0033	0.41066	1117	13	40	1124	18	19	1121	39	110	100.627	100.268
FC_1_9	7417_TRA_Data 238ReCal 15um April12 data	5.109	26	124800	246.5	0.326166	2.08193	518.919	9.56341	5.15	0.12	0.1102	0.0026	2.98	0.075	0.1935	0.0041	0.36139	1401	19	47	1140	22	23	1798	43	100	81.3704	63.4038
FC_1_10	7417_TRA_Data 238ReCal 15um April12 data	5.12	26	127600	265.8	0.342739	5.3697	2744.09	73.1183	5.47	0.12	0.0771	0.002	1.944	0.058	0.1825	0.0039	0.48879	1095	20	43	1081	21	22	1128	54	120	98.7215	95.8333
FishCan_1	7418_TRA_Data 238ReCal 15um April12 data	5.113	26	11010	1018	0.684676	113.111	360.984	13.1148	232	6.7	0.0457	0.0049	0.0275	0.0028	0.00433	0.00012	0.054422	27.5	2.7	3.1	27.86	0.8	0.81	NAN	210	230	101.309	NAN
FishCan_2	7418_TRA_Data 238ReCal 15um April12 data	5.122	25	9690	902	0.638581	116.387	922.857	40	233.5	8.6	0.0463	0.0052	0.0275	0.0026	0.00432	0.00016	0.043819	27.5	2.5	3	27.8	1	1.1	NAN	220	240	101.091	NAN
FishCan_3	7418_TRA_Data 238ReCal 15um April12 data	5.119	26	3810	340	1.16324	70.9812	205.946	12.973	221	11	0.0467	0.0067	0.0288	0.004	0.0045	0.00023	0.068865	28.8	3.9	4.3	29	1.5	1.5	70	300	320	100.694	41.4286
FishCan_4	7418_TRA_Data 238ReCal 15um April12 data	5.217	26	7820	721	0.661581	110.583	109.371	6.01399	228.8	7.5	0.0492	0.0034	0.0284	0.0026	0.00436	0.00013	0.38128	28.5	2.6	3	28.08	0.84	0.85	140	150	180	98.5263	20.0571
FishCan_5	7418_TRA_Data 238ReCal 15um April12 data	5.12	26	7350	687	0.520815	165.542	207.042	8.16901	230.6	7.9	0.0511	0.0049	0.0292	0.0026	0.00433	0.00016	0.16288	29.2	2.5	3	27.9	1	1	240	210	240	95.5479	11.625	0	27.886	0.35664	0.51447	-2.0788
FishCan_6	7418_TRA_Data 238ReCal 15um April12 data	5.119	26	4460	427	1.55269	52.716	228.718	13.3333	238	13	0.0479	0.005	0.0276	0.0024	0.00427	0.00023	0.11424	27.7	2.4	2.9	27.5	1.5	1.5	110	220	250	99.278	25
FishCan_7	7418_TRA_Data 238ReCal 15um April12 data	5.116	25	4640	448	1.57366	51.5535	147.302	7.93651	235	12	0.0435	0.0054	0.0268	0.0041	0.00423	0.00022	0.20739	26.8	4	4.3	27.2	1.4	1.4	10	240	260	101.493	272
FishCan_8	7418_TRA_Data 238ReCal 15um April12 data	5.111	25	3630	329	0.682371	119.636	99.4521	4.65753	224	14	0.0469	0.0091	0.0281	0.005	0.00444	0.00027	0.16636	28.1	5	5.2	28.5	1.7	1.7	30	360	370	101.423	95
FishCan_9	7418_TRA_Data 238ReCal 15um April12 data	5.163	26	5310	479	0.613361	143.413	95.6757	5.94595	223	13	0.0536	0.0081	0.0337	0.0048	0.00445	0.00026	0.036998	33.6	4.8	5.1	28.6	1.7	1.7	300	320	340	85.119	9.53333
FishCan_10	7418_TRA_Data 238ReCal 15um April12 data	5.119	26	3020	319	1.21317	77.2397	90.1493	6.26866	240	14	0.04	0.0074	0.024	0.0048	0.0042	0.00026	0.41189	24	4.7	4.9	27	1.7	1.7	NAN	340	350	112.5	NAN
Plsv_1	7418_TRA_Data 238ReCal 15um April12 data	5.114	26	157800	1239	0.130105	49.1667	4323.29	57.5342	18.83	0.33	0.053	0.0011	0.381	0.01	0.053	0.00088	0.52658	327.9	7.5	17	332.9	5.4	5.7	321	50	130	101.525	103.707
Plsv_2	7418_TRA_Data 238ReCal 15um April12 data	5.113	25	128400	997	0.117954	52.7513	5463.83	123.404	18.55	0.36	0.052	0.0011	0.3849	0.0073	0.054	0.0011	0.44286	330.6	5.4	17	339.3	6.5	6.7	279	50	130	102.632	121.613
Plsv_3	7418_TRA_Data 238ReCal 15um April12 data	5.115	25	149200	1179	0.118575	54.3318	2507.56	57.1429	18.92	0.36	0.0536	0.0013	0.3888	0.0083	0.053	0.001	0.24032	334.8	6.5	18	332.7	6.3	6.5	359	59	140	99.3728	92.6741
Plsv_4	7418_TRA_Data 238ReCal 15um April12 data	5.117	26	158100	1252	0.121565	50.2811	2657.14	70.5882	18.88	0.33	0.0534	0.0015	0.389	0.011	0.05307	0.00094	0.34348	333.1	8.2	18	333.3	5.7	6	351	60	120	100.06	94.9573
Plsv_5	7418_TRA_Data 238ReCal 15um April12 data	5.114	25	158300	1248	0.133093	46.5672	18623.5	364.706	18.81	0.27	0.0529	0.0015	0.3898	0.0082	0.05323	0.00076	0.086053	334.1	6	17	334.3	4.7	5	316	63	130	100.06	105.791
Plsv_6	7418_TRA_Data 238ReCal 15um April12 data	5.106	26	153200	1211	0.118497	52.6522	4197.26	49.3151	18.72	0.32	0.0529	0.0015	0.3826	0.0086	0.05351	0.00092	0.19813	330.6	7	19	336	5.6	5.8	315	67	140	101.633	106.667	1	333.93	1.561	1.0451	-0.940374
Plsv_7	7418_TRA_Data 238ReCal 15um April12 data	5.115	26	157600	1253	0.121548	51.9917	3797.59	77.1084	18.76	0.31	0.0534	0.0016	0.395	0.01	0.05341	0.00089	0.28281	338.1	7.6	18	335.4	5.4	5.7	352	64	130	99.2014	95.2841
Plsv_8	7418_TRA_Data 238ReCal 15um April12 data	5.109	26	146600	1155	0.120693	50.2174	3909.33	82.6667	18.54	0.38	0.053	0.0015	0.39	0.01	0.0538	0.0011	0.39688	334.2	7.3	17	338.1	6.5	6.7	322	63	130	101.167	105
Plsv_9	7418_TRA_Data 238ReCal 15um April12 data	5.113	26	157400	1255	0.128367	45.9707	2366.92	45.1128	18.79	0.22	0.053	0.0011	0.3896	0.0087	0.05311	0.00067	0.33161	335.2	6	16	333.6	4.1	4.4	336	44	120	99.5227	99.2857
Plsv_10	7418_TRA_Data 238ReCal 15um April12 data	5.113	26	151300	1238	0.129483	50.7377	2776.15	56.8807	19.02	0.32	0.0522	0.0013	0.3722	0.0098	0.05246	0.00085	0.50388	321.1	7.2	17	329.6	5.2	5.4	298	54	120	102.647	110.604
R33_1	7417_TRA_Data 238ReCal 15um April12 data	5.113	26	51500	316.2	1.06072	4.79091	1537.31	32.8358	15.18	0.38	0.0554	0.0021	0.502	0.022	0.0661	0.0016	0.58289	413	15	24	413	10	10	450	81	140	100	91.7778
R33_2	7417_TRA_Data 238ReCal 15um April12 data	5.126	26	60300	357.4	1.09037	4.6658	1386.21	39.0805	14.6	0.4	0.055	0.0017	0.512	0.019	0.0688	0.0019	0.53297	419	13	23	429	11	12	418	67	130	102.387	102.632
R33_3	7417_TRA_Data 238ReCal 15um April12 data	5.12	26	59100	357	1.06723	4.86376	1818.46	55.3846	14.8	0.25	0.0566	0.002	0.529	0.017	0.0677	0.0011	0.117	431	11	23	422.3	6.8	7.1	464	80	140	97.9814	91.0129
R33_4	7417_TRA_Data 238ReCal 15um April12 data	5.114	26	55700	341	1.01466	4.92063	3593.55	116.129	15.11	0.29	0.0537	0.0025	0.488	0.02	0.0663	0.0013	0.20556	407	15	25	413.9	7.9	8.2	340	110	160	101.695	121.735
R33_5	7417_TRA_Data 238ReCal 15um April12 data	5.111	26	53300	325.1	0.973854	5.30343	3948.15	88.8889	14.91	0.28	0.0549	0.0024	0.507	0.021	0.0672	0.0013	0.13458	416	14	24	419.4	7.9	8.1	390	96	150	100.817	107.538		417.38	2.5779	1.1971	-0.457906
R33_6	7417_TRA_Data 238ReCal 15um April12 data	5.114	26	46500	283.9	1.11095	4.77143	1021.98	24.1758	15.01	0.43	0.0559	0.002	0.507	0.02	0.0669	0.0018	0.43922	416	14	24	418	11	11	455	73	130	100.481	91.8681
R33_7	7417_TRA_Data 238ReCal 15um April12 data	5.112	26	55400	338.3	1.07272	4.975	12311.1	333.333	14.99	0.41	0.0527	0.0023	0.484	0.018	0.0665	0.0017	0.098346	404	13	24	415	10	10	298	96	150	102.723	139.262
R33_8	7417_TRA_Data 238ReCal 15um April12 data	5.128	26	59600	360.8	1.02578	4.94925	1779.1	44.7761	14.94	0.26	0.0549	0.0018	0.514	0.014	0.0667	0.0013	0.22717	421	9.1	21	418.4	7.1	7.3	434	75	140	99.3824	96.4055
R33_9	7418_TRA_Data 238ReCal 15um April12 data	5.119	26	37270	224.2	0.695361	7.35082	1911.28	45.1282	14.7	0.48	0.0537	0.0032	0.504	0.024	0.0679	0.0025	0.078536	414	16	25	427	14	14	370	120	160	103.14	115.405
R33_10	7418_TRA_Data 238ReCal 15um April12 data	5.118	26	48700	296	1.15203	4.77419	1298.67	48	15.01	0.51	0.055	0.0029	0.495	0.018	0.0671	0.0023	0.022253	408	12	22	419	14	14	390	120	160	102.696	107.436
Temo_1	7417_TRA_Data 238ReCal 15um April12 data	5.105	25	23720	139.1	0.435658	12.453	777.705	21.9672	15.17	0.47	0.0544	0.0036	0.492	0.032	0.0663	0.002	0.080424	414	22	29	414	12	12	390	160	200	100	106.154
Temo_2	7417_TRA_Data 238ReCal 15um April12 data	5.145	26	55200	327.4	0.646915	8.20551	661.078	15.5689	15.21	0.39	0.0537	0.0019	0.491	0.015	0.066	0.0017	0.20209	406	10	21	412	10	10	364	85	150	101.478	113.187
Temo_3	7417_TRA_Data 238ReCal 15um April12 data	5.125	26	57400	332.7	0.642621	8.17445	1114.56	23.301	15	0.29	0.0548	0.0018	0.511	0.014	0.0668	0.0013	0.2605	418.7	9.2	21	416.9	7.9	8.1	394	73	140	99.5701	105.812
Temo_4	7417_TRA_Data 238ReCal 15um April12 data	5.115	26	15100	87.9	0.359499	14.5289	511.864	15.5932	14.65	0.79	0.0551	0.0041	0.514	0.036	0.0694	0.0036	0.17948	419	24	31	433	22	22	380	170	210	103.341	113.947
Temo_5	7417_TRA_Data 238ReCal 15um April12 data	5.111	25	40110	231.5	0.656156	8.60595	662.975	15.5372	14.6	0.35	0.052	0.0021	0.489	0.021	0.0687	0.0017	0.27534	404	14	24	429	10	10	295	86	140	106.188	145.424	2	415.62	3.0536	1.0124	-0.278324
Temo_6	7417_TRA_Data 238ReCal 15um April12 data	5.19	26	41370	244.5	0.652352	7.9902	661.92	10.56	15.14	0.26	0.0574	0.003	0.526	0.027	0.0662	0.0011	0.12592	428	18	26	412.9	6.9	7.2	480	120	160	96.472	86.0208
Temo_7	7417_TRA_Data 238ReCal 15um April12 data	5.128	26	50910	310.3	0.621656	8.71629	14545.7	277.143	14.8	0.37	0.0557	0.0016	0.514	0.018	0.0674	0.0016	0.35549	423	12	24	420.6	9.6	9.9	433	64	130	99.4326	97.1363
Temo_8	7417_TRA_Data 238ReCal 15um April12 data	5.111	26	16400	101.2	0.374506	14.4365	2186.67	64	15.33	0.62	0.0538	0.0037	0.49	0.031	0.0659	0.0026	0.044991	408	19	26	411	16	16	370	160	200	100.735	111.081
Temo_9	7417_TRA_Data 238ReCal 15um April12 data	5.105	26	31240	196.5	0.580662	9.26887	1388.44	30.2222	15.71	0.28	0.0593	0.0025	0.526	0.021	0.0638	0.0012	0.027293	428	14	24	398.6	7	7.3	562	89	140	93.1308	70.9253
Temo_10	7417_TRA_Data 238ReCal 15um April12 data	5.11	26	38810	234.9	0.677735	7.41009	753.592	14.3689	14.93	0.34	0.0552	0.0023	0.514	0.02	0.0672	0.0015	0.24862	420	13	23	419.1	9.1	9.3	403	90	150	99.7857	103.995
Z_91500_1	7417_TRA_Data 238ReCal 15um April12 data	5.155	26	38400	81.2	0.364901	5.44966	1706.67	44.4444	5.7	0.21	0.0754	0.0032	1.84	0.11	0.1769	0.0066	0.6481	1065	41	56	1050	36	36	1063	90	140	98.5915	98.777
Z_91500_2	7417_TRA_Data 238ReCal 15um April12 data	5.136	25	38500	78.3	0.388889	5.11765	1000	28.5714	5.53	0.25	0.0743	0.0033	1.87	0.11	0.1829	0.008	0.65017	1075	42	57	1082	44	44	1056	83	130	100.651	102.462
Z_91500_3	7417_TRA_Data 238ReCal 15um April12 data	5.121	26	38970	82.3	0.360632	5.37908	412.381	8.57143	5.64	0.2	0.0712	0.0024	1.72	0.089	0.1788	0.0065	0.81213	1013	33	49	1060	35	36	953	71	130	104.64	111.228
Z_91500_4	7417_TRA_Data 238ReCal 15um April12 data	5.124	26	37680	81.1	0.371147	5.44295	1004.8	25.3333	5.71	0.27	0.0781	0.0026	1.88	0.11	0.1776	0.0082	0.78993	1070	38	54	1053	45	45	1140	67	120	98.4112	92.3684
Z_91500_5	7417_TRA_Data 238ReCal 15um April12 data	5.112	26	37950	78.3	0.383397	5.43373	914.458	20	5.48	0.2	0.0755	0.0034	1.93	0.1	0.184	0.0072	0.58317	1096	37	54	1088	39	39	1065	88	130	99.2701	102.16
Z_91500_6	7417_TRA_Data 238ReCal 15um April12 data	5.123	26	38260	81.5	0.376442	5.19108	2068.11	35.1351	5.63	0.2	0.0777	0.0029	1.92	0.11	0.1775	0.0059	0.65632	1085	37	53	1053	32	33	1146	70	120	97.0507	91.8848
Z_91500_7	7417_TRA_Data 238ReCal 15um April12 data	5.121	26	37710	80.6	0.377171	5.33775	1676	39.5556	5.6	0.21	0.0724	0.003	1.814	0.088	0.1788	0.0067	0.49955	1048	31	48	1060	37	37	1004	89	140	101.145	105.578	1	1064.4	8.1312	1.107	0.188253
Z_91500_8	7417_TRA_Data 238ReCal 15um April12 data	5.109	26	35200	78.9	0.364512	5.19079	1436.73	31.0204	5.55	0.23	0.0751	0.0031	1.877	0.067	0.182	0.0072	0.47794	1071	24	44	1077	39	40	1078	78	130	100.56	99.9072
Z_91500_9	7417_TRA_Data 238ReCal 15um April12 data	5.108	26	34860	80.4	0.376493	5.58333	1142.95	25.2459	5.67	0.14	0.0762	0.002	1.873	0.073	0.1769	0.0045	0.56777	1076	24	42	1050	24	25	1110	60	130	97.5836	94.5946
Z_91500_10	7418_TRA_Data 238ReCal 15um April12 data	5.13	26	35750	81.6	0.379534	5.16456	14300	328	5.53	0.23	0.0754	0.0028	1.826	0.097	0.1791	0.0062	0.75753	1059	33	48	1072	38	39	1067	75	130	101.228	100.469
Z_91500_11	7418_TRA_Data 238ReCal 15um April12 data	5.123	26	35100	79.2	0.375884	5.28	1114.29	20.6349	5.54	0.23	0.0722	0.0027	1.796	0.085	0.179	0.0076	0.65154	1041	31	48	1060	42	42	981	75	130	101.825	108.053
Z_91500_12	7418_TRA_Data 238ReCal 15um April12 data	5.119	25	35930	83.5	0.380838	6.09489	1260.7	28.0702	5.63	0.27	0.0751	0.0038	1.8	0.11	0.1761	0.0083	0.65557	1042	40	54	1045	45	46	1050	100	140	100.288	99.5238
Z_91500_13	7418_TRA_Data 238ReCal 15um April12 data	5.113	26	34740	77.2	0.386788	4.88608	1263.27	24.7273	5.38	0.22	0.0744	0.0025	1.906	0.076	0.1861	0.0075	0.65798	1081	26	45	1099	41	41	1042	68	130	101.665	105.47
Z_91500_14	7418_TRA_Data 238ReCal 15um April12 data	5.156	26	33320	79.9	0.370463	5.2809	784	17.8824	5.5	0.21	0.0745	0.003	1.82	0.12	0.1818	0.0071	0.71448	1056	43	57	1076	39	39	1042	81	130	101.894	103.263
Z_91500_15	7418_TRA_Data 238ReCal 15um April12 data	5.12	25	32550	80.1	0.377903	5.5625	2244.83	47.5862	5.69	0.21	0.0763	0.0034	1.837	0.091	0.1757	0.0067	0.51695	1063	35	53	1043	37	37	1104	88	130	98.1185	94.4746
1 concentration uncertainty c.20%
2&3 data not corrected for common-Pb
4 Concordence calculated as (206Pb-238U age/207Pb-235U age)*100
5 Concordance calculated as (206Pb-238U age/207Pb-206Pb age)*100
Decay constants of Jaffey et al. (1971) Precision measurement of half-lives and specific activities of 235U and 238U. Physical Reviews, C 4: 1889-1906.
Uncertainties quoted are Iolite output of 2SE that is expressed at 2 sigma level for internal errors only and 2SE sys represent propagated systematic error (Internal error + Calculated Excess uncertainity) (Paton et al.(2010) Improved laser ablation U-Pb zircon geochronology through robust downhole fractionation correction: G3, 11, doi: 10.1029/2009GC002618.)
