# Supplementary material for: Accuracy and precision of U–Pb zircon geochronology at high spatial resolution (7–20 μm spots) by laser ablation-ICP-single-collector-sector-field-mass spectrometry
Source: Royal Society of Chemistry journal article supplement (doi:10.1039/c8ja00321a), 2018-11-21
Supplement: c8ja00321a3.xlsx [file c8ja00321a3.xlsx]

## Sheet: 10um28s
Supplementary Data Table A3: U-Pb data for 10 µm spots, 28 sec integration interval
12/04/2018 Mineral Isotope Laser Laboratory (MILL), Texas Tech University										Data for Tera-Wasserburg plot2				Data for Wetherill plot3					Dates (Ma)3									207-235	207-206			Concordia Age (Ma)		%Age Offset
Identifier	Comments	Duration (s)	#points	206Pb cps	U ppm1	Th/U1	U/Pb1	206Pb/204Pb	2SE	238U/206Pb	2SE	207Pb/206Pb	2SE	207Pb/235U	2SE	206Pb/238U	2SE	Rho	207Pb/235U	2s	2ssys	206Pb/238U	2s	2ssys	207Pb/206Pb	2s	2ssys	% Conc4	% Conc5	Rejects	Age	+2SE	MSWD
FC_1_1	7419_TRA_Data 238ReCal 10um April12 data	26.111	131	125100	542	1.59225	1.14588	14717.6	305.882	5.163	0.057	0.07643	0.00085	2.014	0.029	0.1931	0.0021	0.63183	1119.8	9.8	9.8	1138	11	17	1105	23	40	101.625	102.986
FC_1_2	7419_TRA_Data 238ReCal 10um April12 data	26.122	131	88100	387	0.824289	2.24478	6525.93	251.852	5.182	0.069	0.07615	0.00096	1.992	0.031	0.1938	0.0026	0.63583	1113	10	10	1141	14	19	1094	25	40	102.516	104.296
FC_1_3	7419_TRA_Data 238ReCal 10um April12 data	26.109	132	72500	319	0.887147	2.09455	29000	840	5.201	0.074	0.0758	0.001	1.986	0.037	0.1929	0.0027	0.60321	1110	13	13	1138	15	20	1082	27	42	102.523	105.176
FC_1_4	7419_TRA_Data 238ReCal 10um April12 data	26.123	132	52900	232	0.358621	4.91525	1137.63	51.6129	5.193	0.087	0.0765	0.0013	2.005	0.04	0.1925	0.0032	0.63706	1119	14	14	1136	17	21	1104	34	47	101.519	102.899
FC_1_5	7419_TRA_Data 238ReCal 10um April12 data	26.116	132	85400	379	0.651715	2.84321	2711.11	117.46	5.245	0.076	0.07666	0.00089	1.986	0.031	0.1914	0.0029	0.68088	1112	11	11	1129	16	20	1111	24	41	101.529	101.62		DISCORDANT
FC_1_6	7419_TRA_Data 238ReCal 10um April12 data	26.11	132	93200	400	1.01	1.76835	4779.49	158.974	5.126	0.072	0.0766	0.001	2.02	0.033	0.1952	0.0027	0.63609	1123	11	11	1150	14	19	1106	27	42	102.404	103.978
FC_1_7	7419_TRA_Data 238ReCal 10um April12 data	26.111	132	60000	265	0.449057	4.05199	2666.67	120	5.17	0.079	0.0769	0.0011	2.014	0.039	0.1928	0.003	0.69513	1122	14	14	1136	16	21	1118	28	42	101.248	101.61
FC_1_8	7419_TRA_Data 238ReCal 10um April12 data	26.109	131	66300	297	0.56229	3.3	44200	1266.67	5.344	0.064	0.07675	0.00095	1.958	0.031	0.1878	0.0023	0.69449	1100	11	11	1109	12	18	1110	25	41	100.818	99.9099
FC_1_9	7419_TRA_Data 238ReCal 10um April12 data	26.116	132	66700	293	0.573379	2.32724	698.429	15.7068	5.194	0.072	0.0919	0.0039	2.44	0.12	0.1934	0.0027	0.67651	1242	35	35	1139	15	20	1413	77	83	91.7069	80.6086
FC_1_10	7419_TRA_Data 238ReCal 10um April12 data	26.119	132	93600	410	1.47073	1.25382	37440	1600	5.119	0.072	0.07672	0.00093	2.062	0.031	0.196	0.0028	0.65902	1136	10	10	1153	15	20	1112	24	40	101.496	103.687
FishC_1	7420_TRA_Data 238ReCal 10um April12 data	26.125	132	4460	909	0.90099	88.2524	424.762	14.2857	228.2	4.8	0.0462	0.003	0.0289	0.0019	0.004412	9e-05	0.02484	29.2	1.8	1.8	28.38	0.58	0.67	40	120	130	97.1918	70.95
FishC_2	7420_TRA_Data 238ReCal 10um April12 data	26.118	132	1475	294	1.36429	54.9533	37.3418	1.51899	230.2	8.9	0.0474	0.0067	0.0289	0.0041	0.00437	0.00016	0.13004	28.7	4	4	28.1	1	1.1	20	250	250	97.9094	140.5
FishC_3	7420_TRA_Data 238ReCal 10um April12 data	26.117	132	1422	266	1.17669	71.5054	32.6897	1.58621	226.6	7.9	0.0462	0.0069	0.0292	0.0044	0.0044	0.00015	0.075843	28.9	4.3	4.3	28.28	0.97	1	NAN	250	250	97.8547	NAN
FishC_4	7420_TRA_Data 238ReCal 10um April12 data	26.132	132	2099	430	1.1093	71.9064	93.2889	3.15556	231.3	6.9	0.0468	0.0054	0.0275	0.0031	0.00436	0.00013	0.11415	28.1	3	3	28.06	0.83	0.89	20	200	200	99.8577	140.3
FishC_5	7420_TRA_Data 238ReCal 10um April12 data	24.207	122	1555	300	0.827667	85.7143	72.3256	2.74419	226.2	9.2	0.0429	0.007	0.0262	0.0039	0.00454	0.00018	0.46178	26.1	3.9	3.9	29.2	1.1	1.2	NAN	260	260	111.877	NAN	1	28.194	0.25586	0.87779	-0.997261
FishC_6	7420_TRA_Data 238ReCal 10um April12 data	26.124	132	2631	521.1	0.656496	128.034	1052.4	26.4	227.7	5.9	0.0436	0.0042	0.0284	0.0025	0.00441	0.00012	0.10778	28.3	2.5	2.5	28.36	0.77	0.84	NAN	160	170	100.212	NAN
FishC_7	7420_TRA_Data 238ReCal 10um April12 data	26.114	132	1659	327.1	1.09569	66.0808	28.359	1.05983	226.6	7.9	0.0408	0.0056	0.025	0.0032	0.00438	0.00015	0.010222	25.5	3	3	28.18	0.97	1	NAN	220	220	110.51	NAN
FishC_8	7420_TRA_Data 238ReCal 10um April12 data	26.109	131	2536	516	1.65504	47.1664	112.711	3.42222	230.8	6.4	0.0462	0.0051	0.0271	0.0028	0.00439	0.00012	0.082771	27.1	2.8	2.8	28.23	0.77	0.84	NAN	190	200	104.17	NAN
FishC_9	7420_TRA_Data 238ReCal 10um April12 data	26.136	131	1985	412	1.27184	57.784	208.947	7.36842	237	6.5	0.0439	0.0054	0.0269	0.0032	0.00427	0.00012	0.060054	26.8	3.1	3.1	27.49	0.79	0.86	NAN	210	220	102.575	NAN
FishC_10	7420_TRA_Data 238ReCal 10um April12 data	26.115	132	1363	273.5	0.801097	99.4545	63.3953	2.51163	228.5	8.2	0.0411	0.0063	0.0252	0.0037	0.00443	0.00016	0.19349	25.1	3.7	3.7	28.5	1	1.1	NAN	250	250	113.546	NAN
Plsv_1	7420_TRA_Data 238ReCal 10um April12 data	26.117	131	72800	1197	0.135923	46.7578	5824	160	18.43	0.21	0.05385	0.00079	0.3975	0.0059	0.05407	0.0006	0.36197	340	4.3	4.3	339.4	3.7	5.4	364	33	49	99.8235	93.2418
Plsv_2	7420_TRA_Data 238ReCal 10um April12 data	26.114	132	78000	1254	0.132057	46.9663	5032.26	225.806	18.08	0.18	0.05327	0.00072	0.3995	0.0058	0.05537	0.00056	0.37186	341	4.2	4.2	347.7	3.4	5.3	340	31	48	101.965	102.265
Plsv_3	7420_TRA_Data 238ReCal 10um April12 data	26.12	132	74900	1226	0.119086	53.9375	3328.89	97.7778	18.37	0.16	0.0533	0.00078	0.3926	0.0057	0.05452	0.00049	0.34249	336	4.2	4.2	342.2	3	5.1	342	34	51	101.845	100.058
Plsv_4	7420_TRA_Data 238ReCal 10um April12 data	26.125	132	74000	1192	0.138003	44.3123	2426.23	75.4098	18.24	0.16	0.05336	0.00084	0.3978	0.0051	0.0549	0.00048	0.070165	339.8	3.7	3.7	344.5	2.9	5	342	35	51	101.383	100.731
Plsv_5	7420_TRA_Data 238ReCal 10um April12 data	26.11	131	73800	1204	0.139784	44.2647	5904	152	18.46	0.16	0.05249	0.00073	0.39	0.0061	0.05426	0.00047	0.36832	334.5	4.4	4.4	340.6	2.9	5	311	33	51	101.824	109.518	3	340.88	1.0483	4.0025	1.12133
Plsv_6	7420_TRA_Data 238ReCal 10um April12 data	26.157	132	94100	1526	0.126212	48.4444	2578.08	117.808	18.09	0.15	0.0529	0.00075	0.3981	0.0059	0.0554	0.00045	0.39136	340	4.3	4.3	347.6	2.7	5	323	32	48	102.235	107.616
Plsv_7	7420_TRA_Data 238ReCal 10um April12 data	26.117	131	78700	1276	0.120298	50.2362	2216.9	59.1549	18.31	0.15	0.05272	0.00071	0.3942	0.0059	0.0546	0.00045	0.40904	337.6	4.2	4.2	342.7	2.8	4.9	307	31	48	101.511	111.629
Plsv_8	7420_TRA_Data 238ReCal 10um April12 data	26.229	132	73900	1210	0.119669	53.0702	8694.12	200	18.58	0.17	0.0538	0.00074	0.3956	0.0052	0.05383	0.00051	0.29137	338.2	3.8	3.8	338.3	3.1	5.1	359	31	48	100.03	94.234
Plsv_9	7420_TRA_Data 238ReCal 10um April12 data	26.119	131	73000	1199	0.137698	43.6	1802.47	51.8519	18.69	0.19	0.0549	0.00085	0.4038	0.0057	0.05354	0.00056	0.2182	344.1	4.1	4.1	336.2	3.4	5.2	402	35	50	97.7042	83.6318
Plsv_10	7420_TRA_Data 238ReCal 10um April12 data	26.126	132	98600	1610	0.131056	49.3865	1629.75	87.6033	18.16	0.19	0.05276	0.00059	0.3968	0.0051	0.05505	0.00054	0.55437	339.1	3.7	3.7	345.4	3.3	5.3	311	25	45	101.858	111.061
R33_1	7419_TRA_Data 238ReCal 10um April12 data	26.121	132	27990	344	1.13081	4.52632	948.814	19.661	14.57	0.2	0.0559	0.0015	0.516	0.012	0.06863	0.00094	0.2516	422.7	7.9	7.9	427.8	5.7	7.6	428	59	69	101.207	99.9533
R33_2	7419_TRA_Data 238ReCal 10um April12 data	26.12	132	25940	335	1.07075	4.67225	710.685	15.3425	14.96	0.19	0.0555	0.0013	0.507	0.012	0.06653	0.00083	0.24645	417.1	8.1	8.1	415.1	5	7	433	54	65	99.5205	95.8661
R33_3	7419_TRA_Data 238ReCal 10um April12 data	26.111	132	17190	218	0.603211	7.98535	1809.47	75.7895	14.84	0.23	0.0542	0.0017	0.497	0.016	0.0676	0.0011	0.36326	409	11	11	421.4	6.5	8.2	356	68	76	103.032	118.371
R33_4	7419_TRA_Data 238ReCal 10um April12 data	26.109	131	11790	152.4	0.536089	9.50717	351.94	9.25373	15.14	0.31	0.0566	0.0018	0.505	0.017	0.0665	0.0014	0.38394	416	12	12	414.9	8.4	9.7	439	71	79	99.7356	94.5103
R33_5	7419_TRA_Data 238ReCal 10um April12 data	26.15	132	13320	172.6	0.516802	10.1529	484.364	14.1818	14.98	0.26	0.0554	0.002	0.506	0.019	0.0671	0.0012	0.35921	415	12	12	418.6	7.2	8.7	418	79	87	100.867	100.144	1	421.33	2.0651	2.7626	0.48414
R33_6	7419_TRA_Data 238ReCal 10um April12 data	26.159	132	32630	410	0.567805	8.7234	2250.34	64.8276	14.4	0.2	0.0555	0.0011	0.522	0.011	0.0693	0.00099	0.4411	425.9	7	7	431.9	6	7.9	432	44	57	101.409	99.9769
R33_7	7420_TRA_Data 238ReCal 10um April12 data	26.119	132	11670	147.4	0.567843	8.71674	440.377	7.16981	14.58	0.29	0.0554	0.002	0.525	0.022	0.069	0.0013	0.38132	431	14	14	429.9	8	9.5	417	82	90	99.7448	103.094
R33_8	7420_TRA_Data 238ReCal 10um April12 data	26.116	132	12590	160.8	0.549129	9.40901	535.745	8.93617	14.69	0.29	0.0546	0.0021	0.512	0.019	0.0681	0.0014	0.33537	419	13	13	424.5	8.4	9.7	396	81	88	101.313	107.197
R33_9	7420_TRA_Data 238ReCal 10um April12 data	26.119	132	16380	215.8	0.538462	9.18298	1310.4	36	15.15	0.27	0.0557	0.0016	0.511	0.016	0.066	0.0011	0.33892	421	11	11	412	6.8	8.4	418	66	76	97.8622	98.5646
R33_10	7420_TRA_Data 238ReCal 10um April12 data	26.144	131	14810	187.6	0.601279	8.72558	2692.73	78.1818	14.35	0.26	0.0561	0.0019	0.539	0.019	0.0699	0.0013	0.42834	438	12	12	435.5	7.6	9.2	417	72	80	99.4292	104.436
Temora_1	7419_TRA_Data 238ReCal 10um April12 data	26.116	132	20340	262	0.648473	7.8209	5811.43	242.857	14.94	0.25	0.0552	0.0015	0.51	0.014	0.0669	0.0011	0.38311	420.3	9.2	9.2	417.5	6.5	8.1	418	59	69	99.3338	99.8804
Temora_2	7419_TRA_Data 238ReCal 10um April12 data	26.12	131	23600	285	0.592982	7.80822	2484.21	115.789	14.58	0.22	0.0565	0.0014	0.54	0.015	0.06872	0.00098	0.41506	437	9.7	9.7	428.4	5.9	7.8	467	53	64	98.032	91.7345
Temora_3	7419_TRA_Data 238ReCal 10um April12 data	26.119	132	22480	290	0.443103	11.284	4995.56	124.444	15.12	0.25	0.0555	0.0014	0.493	0.013	0.0666	0.0011	0.36957	407.7	8.5	8.5	415.6	6.7	8.3	417	55	65	101.938	99.6643
Temora_4	7419_TRA_Data 238ReCal 10um April12 data	26.12	132	26500	331	0.438973	11.3356	3117.65	152.941	14.71	0.23	0.0549	0.0013	0.515	0.013	0.0682	0.0011	0.41943	420.5	8.9	8.9	425	6.4	8.1	395	52	63	101.07	107.595
Temora_5	7419_TRA_Data 238ReCal 10um April12 data	26.121	132	27400	354	0.436441	11.2025	7828.57	285.714	15.15	0.22	0.0557	0.0013	0.498	0.012	0.06605	0.00092	0.33494	411.1	8.1	8.1	412.2	5.6	7.4	440	54	66	100.268	93.6818	0	415.09	1.8871	1.91	-0.40549
Temora_6	7419_TRA_Data 238ReCal 10um April12 data	26.123	132	27400	355	0.44338	11.5635	4215.38	169.231	15.02	0.22	0.0568	0.0013	0.513	0.014	0.0667	0.001	0.40866	420.2	9	9	416.3	6	7.8	488	53	64	99.0719	85.3074
Temora_7	7419_TRA_Data 238ReCal 10um April12 data	26.217	132	28850	368.2	0.482347	10.7347	11540	152	15.22	0.2	0.056	0.0012	0.503	0.01	0.06585	0.00086	0.35241	412.8	7	7	411	5.2	7.1	457	48	61	99.564	89.9344
Temora_8	7419_TRA_Data 238ReCal 10um April12 data	26.115	132	25150	318.6	0.446955	11.4194	852.542	14.5763	14.97	0.24	0.0572	0.0015	0.521	0.013	0.0669	0.001	0.27735	425.6	9	9	418	6.3	8.1	467	58	68	98.2143	89.5075
Temora_9	7419_TRA_Data 238ReCal 10um April12 data	26.113	131	30730	397.3	0.41933	12.076	975.556	16.5079	15.22	0.2	0.055	0.0013	0.494	0.012	0.06578	0.00085	0.47572	407.3	8.4	8.4	410.6	5.1	7.1	399	51	63	100.81	102.907
Temora_10	7419_TRA_Data 238ReCal 10um April12 data	26.117	132	17840	231	0.674459	7.5	7136	248	15.1	0.28	0.0566	0.0016	0.512	0.016	0.0662	0.0012	0.44959	418	11	11	413	7	8.5	473	62	71	98.8038	87.315
Z_91500_1	7419_TRA_Data 238ReCal 10um April12 data	26.113	132	17000	79.3	0.373518	5.37627	2615.38	55.3846	5.63	0.16	0.0739	0.0017	1.841	0.063	0.1778	0.005	0.6979	1055	23	23	1053	27	30	1038	49	59	99.8104	101.445
Z_91500_2	7419_TRA_Data 238ReCal 10um April12 data	26.119	131	17000	80.1	0.367291	5.15113	918.919	18.3784	5.62	0.15	0.074	0.0019	1.85	0.069	0.18	0.0048	0.69627	1064	24	24	1065	26	29	1029	52	62	100.094	103.499
Z_91500_3	7419_TRA_Data 238ReCal 10um April12 data	26.115	131	17390	81.6	0.37598	5.3897	34780	680	5.62	0.14	0.0757	0.0018	1.847	0.06	0.1784	0.0043	0.70544	1066	21	21	1057	23	26	1073	50	60	99.1557	98.5089
Z_91500_4	7419_TRA_Data 238ReCal 10um April12 data	26.125	132	17080	80.4	0.376244	5.24462	578.983	15.5932	5.61	0.14	0.0759	0.0021	1.862	0.065	0.1796	0.0047	0.58559	1062	23	23	1063	25	28	1088	57	66	100.094	97.7022
Z_91500_5	7419_TRA_Data 238ReCal 10um April12 data	26.116	131	17310	79.7	0.379172	5.39607	34620	700	5.58	0.13	0.0753	0.0019	1.855	0.062	0.1798	0.0041	0.60765	1060	22	22	1067	23	26	1067	51	61	100.66	100
Z_91500_6	7419_TRA_Data 238ReCal 10um April12 data	26.113	132	16870	78.8	0.383503	5.27796	33740	720	5.61	0.14	0.0744	0.0018	1.845	0.054	0.1799	0.0045	0.6416	1062	20	20	1070	24	27	1057	49	58	100.753	101.23
Z_91500_7	7419_TRA_Data 238ReCal 10um April12 data	26.117	132	16660	79.9	0.366083	5.36602	1960	51.7647	5.69	0.15	0.075	0.002	1.851	0.056	0.1775	0.0047	0.58404	1064	20	20	1054	26	29	1054	56	65	99.0602	100	0	1063.4	5.3226	0.37468	0.0941265
Z_91500_8	7419_TRA_Data 238ReCal 10um April12 data	26.122	132	16960	80	0.381625	5.30504	616.727	15.6364	5.58	0.14	0.0757	0.002	1.831	0.062	0.1781	0.0046	0.70672	1056	22	22	1055	25	28	1095	50	59	99.9053	96.347
Z_91500_9	7419_TRA_Data 238ReCal 10um April12 data	26.122	131	16810	78	0.389231	5.52017	425.57	8.86076	5.51	0.14	0.0748	0.0019	1.872	0.06	0.1836	0.0046	0.68124	1064	21	21	1085	25	28	1062	51	61	101.974	102.166
Z_91500_10	7420_TRA_Data 238ReCal 10um April12 data	26.119	132	16210	79.7	0.371142	5.10897	4631.43	122.857	5.66	0.16	0.0727	0.002	1.831	0.069	0.1789	0.005	0.73446	1050	24	24	1062	28	31	995	55	64	101.143	106.734
Z_91500_11	7420_TRA_Data 238ReCal 10um April12 data	26.108	132	16700	83.2	0.358173	5.61783	776.744	22.3256	5.65	0.16	0.0763	0.0018	1.859	0.057	0.1771	0.0049	0.69081	1063	20	20	1052	26	29	1103	49	60	98.9652	95.3762
Z_91500_12	7420_TRA_Data 238ReCal 10um April12 data	26.116	132	16080	80.7	0.373482	5.85631	2473.85	56.9231	5.67	0.14	0.0744	0.002	1.836	0.065	0.1774	0.0046	0.61463	1050	23	23	1051	25	28	1043	56	65	100.095	100.767
Z_91500_13	7420_TRA_Data 238ReCal 10um April12 data	26.124	132	16090	79.9	0.372466	5.14157	249.457	5.27132	5.65	0.13	0.0759	0.002	1.862	0.052	0.1795	0.004	0.46751	1065	18	18	1063	22	25	1090	55	64	99.8122	97.5229
Z_91500_14	7420_TRA_Data 238ReCal 10um April12 data	26.105	132	16320	79	0.381899	5.25266	1305.6	32.8	5.57	0.14	0.0742	0.0018	1.858	0.062	0.1799	0.0046	0.65416	1065	22	22	1065	25	28	1054	47	57	100	101.044
Z_91500_15	7420_TRA_Data 238ReCal 10um April12 data	26.114	132	16570	80.8	0.372525	4.97231	494.627	14.0299	5.52	0.13	0.0751	0.0019	1.842	0.059	0.1796	0.0045	0.62351	1056	21	21	1068	24	27	1049	51	60	101.136	101.811
1 concentration uncertainty c.20%
2&3 data not corrected for common-Pb
4 Concordence calculated as (206Pb-238U age/207Pb-235U age)*100
5 Concordance calculated as (206Pb-238U age/207Pb-206Pb age)*100
Decay constants of Jaffey et al. (1971) Precision measurement of half-lives and specific activities of 235U and 238U. Physical Reviews, C 4: 1889-1906.
Uncertainties quoted are Iolite output of 2SE that is expressed at 2 sigma level for internal errors only and 2SE sys represent propagated systematic error (Internal error + Calculated Excess uncertainity) (Paton et al.(2010) Improved laser ablation U-Pb zircon geochronology through robust downhole fractionation correction: G3, 11, doi: 10.1029/2009GC002618.)

## Sheet: 10um15s
Supplementary Data Table A3: U-Pb data for 10 µm spots, 15 sec integration interval
12/04/2018 Mineral Isotope Laser Laboratory (MILL), Texas Tech University										Data for Tera-Wasserburg plot2				Data for Wetherill plot3					Dates (Ma)3									207-235	207-206			Concordia Age (Ma)		%Age Offset
Identifier	Comments	Duration (s)	#points	206Pb cps	U ppm1	Th/U1	U/Pb1	206Pb/204Pb	2SE	238U/206Pb	2SE	207Pb/206Pb	2SE	207Pb/235U	2SE	206Pb/238U	2SE	Rho	207Pb/235U	2s	2ssys	206Pb/238U	2s	2ssys	207Pb/206Pb	2s	2ssys	% Conc4	% Conc5	Rejects	Age	+2SE	MSWD
FC_1_1	7419_TRA_Data 238ReCal 10um April12 data	13.111	66	136100	557	1.7289	1.08366	2287.39	42.0168	5.356	0.08	0.076	0.0012	1.979	0.04	0.1869	0.0027	0.61951	1109	13	23	1105	15	27	1101	32	32	99.6393	100.363
FC_1_2	7419_TRA_Data 238ReCal 10um April12 data	13.122	66	105000	439	0.801822	2.32891	4883.72	125.581	5.447	0.083	0.0756	0.0012	1.936	0.031	0.1838	0.0028	0.57744	1095	11	22	1088	15	27	1087	31	31	99.3607	100.092
FC_1_3	7419_TRA_Data 238ReCal 10um April12 data	13.109	66	82900	347	0.919308	2.06671	2474.63	59.7015	5.41	0.1	0.0746	0.0014	1.945	0.052	0.1855	0.0037	0.63463	1097	17	25	1097	20	30	1061	37	37	100	103.393
FC_1_4	7419_TRA_Data 238ReCal 10um April12 data	13.123	67	64600	268	0.401119	4.40066	1722.67	66.6667	5.354	0.098	0.0763	0.0017	1.987	0.049	0.1873	0.0035	0.54169	1109	17	25	1107	19	29	1096	44	44	99.8197	101.004
FC_1_5	7419_TRA_Data 238ReCal 10um April12 data	13.116	66	103400	437	0.704805	2.66789	2912.68	98.5915	5.51	0.081	0.0765	0.0011	1.946	0.033	0.1813	0.0028	0.55898	1096	11	22	1074	15	27	1102	30	30	97.9927	97.4592		1102.8	4.1041	2.3392	0.345769
FC_1_6	7419_TRA_Data 238ReCal 10um April12 data	13.11	66	108600	440	0.931364	1.98735	10342.9	323.81	5.314	0.093	0.0756	0.0013	1.993	0.037	0.1881	0.0032	0.57017	1112	13	23	1111	17	28	1076	35	35	99.9101	103.253
FC_1_7	7419_TRA_Data 238ReCal 10um April12 data	13.111	67	73100	302	0.501656	3.69645	4177.14	120	5.338	0.098	0.0762	0.0014	2.005	0.05	0.1868	0.0035	0.69564	1117	17	25	1104	19	29	1104	37	37	98.8362	100
FC_1_8	7419_TRA_Data 238ReCal 10um April12 data	13.109	66	75600	317	0.567823	3.36518	1821.69	43.3735	5.435	0.084	0.0761	0.0013	1.948	0.035	0.1847	0.0029	0.5425	1096	12	22	1092	16	27	1091	33	33	99.635	100.092
FC_1_9	7419_TRA_Data 238ReCal 10um April12 data	13.116	66	73700	308	0.586688	3.21503	4754.84	103.226	5.422	0.088	0.0759	0.0013	1.94	0.043	0.1848	0.0031	0.61844	1095	15	24	1093	17	28	1087	34	34	99.8174	100.552
FC_1_10	7419_TRA_Data 238ReCal 10um April12 data	13.119	66	114500	470	1.4617	1.29477	5088.89	177.778	5.296	0.095	0.0767	0.0012	2.028	0.039	0.1898	0.0034	0.60674	1124	13	23	1120	18	29	1111	33	33	99.6441	100.81
FishC_1	7420_TRA_Data 238ReCal 10um April12 data	13.125	66	5090	933	0.917471	85.2055	1454.29	48.5714	225.2	6.3	0.0456	0.0039	0.0281	0.0023	0.00446	0.00013	0.026124	28.1	2.3	2.4	28.71	0.82	1	30	170	170	102.171	95.7
FishC_2	7420_TRA_Data 238ReCal 10um April12 data	13.118	66	1668	296.2	1.34841	57.0713	33.0297	1.56436	215.1	8.7	0.0509	0.0095	0.0311	0.0056	0.00458	0.0002	0.13093	30.8	5.5	5.6	29.4	1.3	1.5	120	330	330	95.4545	24.5
FishC_3	7420_TRA_Data 238ReCal 10um April12 data	13.117	66	1580	278	1.24101	68.1373	36.3218	2.75862	217	10	0.0476	0.0087	0.0306	0.0059	0.00452	0.00019	0.26212	30.3	5.8	5.9	29.1	1.2	1.4	10	330	330	96.0396	291
FishC_4	7420_TRA_Data 238ReCal 10um April12 data	13.132	66	2358	431.9	1.26418	60.9168	42.4865	1.63964	226.8	9.7	0.0472	0.0067	0.0278	0.004	0.00448	0.00018	0.32684	27.7	3.9	4	28.8	1.2	1.3	40	250	250	103.971	72
FishC_5	7420_TRA_Data 238ReCal 10um April12 data	11.48	58	1762	313	0.81885	85.989	43.5062	2.07407	217	10	0.0371	0.0088	0.0237	0.0053	0.00469	0.00023	0.64055	23.6	5.3	5.3	30.2	1.5	1.6	NAN	330	330	127.966	NAN		28.847	0.337	2.7649	1.29574
FishC_6	7420_TRA_Data 238ReCal 10um April12 data	13.124	66	2590	449.7	0.65288	138.796	345.333	12	223.3	8.6	0.0406	0.0056	0.0255	0.0037	0.00459	0.00018	0.075902	26	3.7	3.8	29.5	1.2	1.3	NAN	220	220	113.462	NAN
FishC_7	7420_TRA_Data 238ReCal 10um April12 data	13.114	66	1807	315.6	1.13847	62.3715	53.9403	2	216.7	8.6	0.0401	0.008	0.0249	0.0048	0.00459	0.00018	0.08063	24.8	4.7	4.8	29.5	1.2	1.3	NAN	310	310	118.952	NAN
FishC_8	7420_TRA_Data 238ReCal 10um April12 data	13.109	66	2500	470	1.74468	49.5258	51.5464	2.47423	233.4	8.8	0.0513	0.0077	0.0297	0.004	0.00434	0.00016	0.19911	30.1	3.9	3.9	27.9	1	1.2	150	260	260	92.691	18.6
FishC_9	7420_TRA_Data 238ReCal 10um April12 data	13.136	66	2181	407	1.25012	63.8932	89.0204	3.63265	235.2	8.6	0.0481	0.0071	0.0282	0.004	0.00425	0.00016	0.041849	28.6	4.1	4.1	27.3	1	1.2	140	270	270	95.4545	19.5
FishC_10	7420_TRA_Data 238ReCal 10um April12 data	13.115	66	1481	266.5	0.827392	90.6463	128.783	6.86957	231	12	0.0372	0.008	0.023	0.0047	0.00446	0.00024	0.15356	23	4.6	4.7	28.7	1.5	1.7	NAN	320	320	124.783	NAN
Plsv_1	7420_TRA_Data 238ReCal 10um April12 data	13.117	66	83000	1214	0.13855	47.6078	3132.08	64.1509	18.7	0.29	0.0529	0.0011	0.3892	0.0066	0.05312	0.00082	0.27039	333.6	4.8	9.2	333.6	5	8.7	320	47	47	100	104.25
Plsv_2	7420_TRA_Data 238ReCal 10um April12 data	13.114	66	96500	1406	0.129232	49.682	2969.23	129.231	18.59	0.25	0.05328	0.00084	0.3957	0.0078	0.05385	0.00073	0.44897	338.3	5.7	9.8	338.1	4.5	8.5	334	36	36	99.9409	101.228
Plsv_3	7420_TRA_Data 238ReCal 10um April12 data	13.12	66	85800	1262	0.121395	58.1567	1845.16	30.1075	18.86	0.24	0.0521	0.00095	0.3848	0.0069	0.05316	0.0007	0.29906	330.3	5	9.3	333.9	4.3	8.3	281	41	41	101.09	118.826
Plsv_4	7420_TRA_Data 238ReCal 10um April12 data	13.125	67	85200	1231	0.139886	45.4244	11360	253.333	18.53	0.2	0.0535	0.0012	0.3952	0.0062	0.05406	0.00059	0.10895	339.5	4.8	9.9	339.4	3.6	8.1	345	48	48	99.9705	98.3768
Plsv_5	7420_TRA_Data 238ReCal 10um April12 data	13.11	66	83000	1222	0.139607	43.4875	4742.86	91.4286	19.01	0.22	0.05197	0.0009	0.3782	0.0073	0.05272	0.0006	0.36092	325.5	5.4	9.4	331.2	3.7	8	282	39	39	101.751	117.447	2	335.85	1.2385	1.8071	-0.37081
Plsv_6	7420_TRA_Data 238ReCal 10um April12 data	13.157	66	117800	1694	0.124675	52.4458	4808.16	73.4694	18.6	0.22	0.05241	0.00099	0.3881	0.0077	0.0538	0.00064	0.38285	332.8	5.6	9.7	337.8	3.9	8.2	306	43	43	101.502	110.392
Plsv_7	7420_TRA_Data 238ReCal 10um April12 data	13.117	66	89100	1298	0.120339	54.3096	1697.14	40	18.66	0.22	0.053	0.001	0.3946	0.0079	0.05342	0.00061	0.34687	337.5	5.7	9.8	335.5	3.7	8.1	321	44	44	99.4074	104.517
Plsv_8	7420_TRA_Data 238ReCal 10um April12 data	13.229	67	81900	1212	0.118894	54.1071	32760	520	18.99	0.23	0.0542	0.001	0.3922	0.0072	0.0526	0.00063	0.25519	335.8	5.2	9.5	330.5	3.9	8	383	41	41	98.4217	86.2924
Plsv_9	7420_TRA_Data 238ReCal 10um April12 data	13.119	66	84100	1213	0.138664	44.4322	1933.33	39.0805	18.8	0.23	0.0543	0.0011	0.3973	0.0076	0.05333	0.00067	0.1277	339.5	5.5	9.7	334.9	4.1	8.2	378	48	48	98.6451	88.5979
Plsv_10	7420_TRA_Data 238ReCal 10um April12 data	13.126	66	126000	1850	0.127622	51.8207	2597.94	74.2268	18.74	0.24	0.05238	0.00067	0.3794	0.0056	0.05349	0.00068	0.59422	326.5	4.1	8.8	335.9	4.2	8.3	310	32	32	102.879	108.355
R33_1	7419_TRA_Data 238ReCal 10um April12 data	13.121	66	30110	347	1.11326	4.67026	824.932	20	14.86	0.25	0.0547	0.0019	0.514	0.017	0.0673	0.0012	0.23242	422	11	14	419.5	7	11	373	79	79	99.4076	112.466
R33_2	7419_TRA_Data 238ReCal 10um April12 data	13.12	66	28540	333	1.08649	4.84012	471.736	10.7438	15.1	0.25	0.0542	0.0017	0.517	0.016	0.0661	0.0011	0.12417	424	10	14	412.8	6.6	11	381	72	72	97.3585	108.346
R33_3	7419_TRA_Data 238ReCal 10um April12 data	13.111	66	20990	238	0.591597	8.17869	5997.14	208.571	14.9	0.32	0.0536	0.0023	0.508	0.022	0.0674	0.0015	0.32368	415	15	18	420.3	8.8	12	338	91	91	101.277	124.349
R33_4	7419_TRA_Data 238ReCal 10um April12 data	13.109	66	13350	155.7	0.53115	9.32335	197.778	5.03704	15.27	0.43	0.0566	0.0024	0.52	0.025	0.0661	0.0018	0.46977	425	16	19	412	11	14	440	94	94	96.9412	93.6364
R33_5	7419_TRA_Data 238ReCal 10um April12 data	13.15	66	15220	176.6	0.521518	9.92135	342.022	7.64045	14.83	0.34	0.0562	0.0027	0.529	0.025	0.0673	0.0016	0.27931	432	16	19	419.8	9.8	13	460	110	110	97.1759	91.2609	1	420.17	2.7041	1.4942	0.207489
R33_6	7419_TRA_Data 238ReCal 10um April12 data	13.159	66	36600	428	0.568458	9.01053	1978.38	59.4595	14.69	0.26	0.0552	0.0016	0.521	0.016	0.068	0.0012	0.44417	425	10	14	424.3	7.3	12	417	65	65	99.8353	101.751
R33_7	7420_TRA_Data 238ReCal 10um April12 data	13.119	66	12380	140.2	0.548502	8.70807	298.313	6.26506	14.66	0.35	0.053	0.0026	0.516	0.031	0.0688	0.0017	0.4354	419	21	23	429	10	13	320	110	110	102.387	134.062
R33_8	7420_TRA_Data 238ReCal 10um April12 data	13.116	66	13430	152	0.540789	10.0662	2066.15	36.9231	14.42	0.37	0.0512	0.0027	0.497	0.025	0.0693	0.0019	0.23263	410	17	19	432	11	14	260	110	110	105.366	166.154
R33_9	7420_TRA_Data 238ReCal 10um April12 data	13.119	67	18460	219.5	0.545786	8.92276	647.719	15.0877	15.15	0.42	0.0548	0.0021	0.505	0.021	0.0663	0.0017	0.37883	419	15	18	414	11	14	385	87	87	98.8067	107.532
R33_10	7420_TRA_Data 238ReCal 10um April12 data	13.144	66	16870	191.2	0.605649	8.42291	1466.96	30.4348	14.29	0.37	0.0544	0.0024	0.526	0.025	0.07	0.0017	0.50318	427	17	19	436	10	14	349	98	98	102.108	124.928
Temora_1	7419_TRA_Data 238ReCal 10um April12 data	13.116	66	24630	292	0.643151	7.76596	757.846	22.1538	14.9	0.27	0.0549	0.0021	0.511	0.017	0.0667	0.0012	0.21407	418	11	15	416.1	7.3	11	416	84	84	99.5455	100.024
Temora_2	7419_TRA_Data 238ReCal 10um April12 data	13.12	66	28900	328	0.60061	7.54023	19266.7	933.333	14.49	0.3	0.0559	0.0016	0.532	0.017	0.069	0.0015	0.51955	432	12	15	431.3	8.5	12	437	64	64	99.838	98.6957
Temora_3	7419_TRA_Data 238ReCal 10um April12 data	13.119	66	25370	300	0.438	10.9489	2029.6	50.4	15.06	0.37	0.0562	0.0019	0.506	0.018	0.0669	0.0017	0.52322	417	12	16	417	10	14	444	74	74	100	93.9189
Temora_4	7419_TRA_Data 238ReCal 10um April12 data	13.12	66	33300	372	0.43629	11.6614	493.333	16.2963	14.31	0.3	0.0538	0.0015	0.519	0.016	0.0697	0.0014	0.48357	423	11	14	434.2	8.4	12	363	65	65	102.648	119.614
Temora_5	7419_TRA_Data 238ReCal 10um April12 data	13.121	66	32390	386	0.419948	11.4881	1750.81	48.1081	15.17	0.25	0.0561	0.0016	0.501	0.015	0.0657	0.0011	0.40389	412.9	9.5	13	410.1	6.4	11	436	62	62	99.3219	94.0596		416.11	2.4938	1.3989	-0.160756
Temora_6	7419_TRA_Data 238ReCal 10um April12 data	13.123	66	32690	390	0.432308	11.6766	3845.88	104.706	15.01	0.31	0.0567	0.0018	0.513	0.018	0.0667	0.0014	0.39167	419	12	15	415.9	8.6	12	463	71	71	99.2601	89.8272
Temora_7	7419_TRA_Data 238ReCal 10um April12 data	13.217	66	30540	356.4	0.474747	11	2655.65	40.8696	15.04	0.24	0.0553	0.0016	0.507	0.016	0.0664	0.0011	0.32098	415	11	14	414.7	6.7	11	429	71	71	99.9277	96.6667
Temora_8	7419_TRA_Data 238ReCal 10um April12 data	13.115	67	27230	312.2	0.440423	11.4779	518.667	8.95238	14.85	0.33	0.0558	0.002	0.516	0.02	0.0677	0.0015	0.40502	425	13	16	422	9	13	447	79	79	99.2941	94.4072
Temora_9	7419_TRA_Data 238ReCal 10um April12 data	13.113	66	32160	374.9	0.417178	12.4139	960	16.7164	15.17	0.27	0.0534	0.0017	0.494	0.018	0.0658	0.0011	0.48632	406	12	15	410.5	6.6	11	322	71	71	101.108	127.484
Temora_10	7419_TRA_Data 238ReCal 10um April12 data	13.117	66	20910	247	0.666802	7.84127	8364	184	15.17	0.38	0.0558	0.0023	0.513	0.024	0.0662	0.0017	0.42065	419	16	19	413	10	13	433	89	89	98.568	95.3811
Z_91500_1	7419_TRA_Data 238ReCal 10um April12 data	13.113	66	18580	80.6	0.367122	5.44595	1955.79	33.6842	5.61	0.2	0.0737	0.0023	1.799	0.07	0.1794	0.0066	0.56596	1044	25	31	1062	36	42	1040	66	66	101.724	102.115
Z_91500_2	7419_TRA_Data 238ReCal 10um April12 data	13.119	66	18270	79.5	0.372956	5.17578	5220	85.7143	5.66	0.18	0.0761	0.0022	1.856	0.079	0.1779	0.0056	0.68466	1067	28	33	1054	31	37	1088	57	57	98.7816	96.875
Z_91500_3	7419_TRA_Data 238ReCal 10um April12 data	13.115	66	18730	80.1	0.377903	5.625	1971.58	33.6842	5.6	0.16	0.0753	0.0024	1.9	0.077	0.1801	0.0055	0.68624	1075	27	33	1067	30	37	1083	63	63	99.2558	98.5226
Z_91500_4	7419_TRA_Data 238ReCal 10um April12 data	13.125	66	19200	82	0.380732	5.15723	395.876	10.5155	5.6	0.19	0.0755	0.0026	1.874	0.084	0.1801	0.0063	0.63457	1069	29	34	1071	34	40	1056	71	71	100.187	101.42
Z_91500_5	7419_TRA_Data 238ReCal 10um April12 data	13.116	66	18680	79.1	0.377497	5.20395	1132.12	18.1818	5.62	0.18	0.0747	0.0025	1.848	0.082	0.1784	0.0058	0.57958	1061	30	35	1057	32	38	1059	68	68	99.623	99.8111
Z_91500_6	7419_TRA_Data 238ReCal 10um April12 data	13.113	66	18380	78	0.386795	5.13158	816.889	14.2222	5.53	0.2	0.073	0.0025	1.889	0.082	0.1839	0.0066	0.66871	1075	29	35	1087	36	42	1038	67	67	101.116	104.721
Z_91500_7	7419_TRA_Data 238ReCal 10um April12 data	13.117	66	18600	83.6	0.353828	5.76552	459.259	12.3457	5.77	0.2	0.0751	0.0027	1.793	0.072	0.1751	0.0061	0.51982	1038	26	32	1039	33	39	1053	77	77	100.096	98.6705		1062.8	6.7541	0.65805	0.0376506
Z_91500_8	7419_TRA_Data 238ReCal 10um April12 data	13.122	66	18780	79.7	0.376286	5.20915	615.738	12.7869	5.61	0.17	0.0742	0.0026	1.837	0.08	0.1782	0.0056	0.71738	1066	29	35	1056	31	38	1052	66	66	99.0619	100.38
Z_91500_9	7419_TRA_Data 238ReCal 10um April12 data	13.122	66	18270	78.3	0.383653	5.47552	545.373	8.95522	5.6	0.2	0.0764	0.0026	1.918	0.08	0.1812	0.0067	0.67447	1081	28	33	1072	36	42	1099	70	70	99.1674	97.5432
Z_91500_10	7420_TRA_Data 238ReCal 10um April12 data	13.119	66	18420	81.6	0.362132	5.16456	12280	346.667	5.6	0.2	0.0728	0.0027	1.821	0.081	0.181	0.0063	0.57526	1055	29	34	1071	34	41	1010	77	77	101.517	106.04
Z_91500_11	7420_TRA_Data 238ReCal 10um April12 data	13.108	66	19060	86	0.359767	5.65789	2006.32	51.5789	5.65	0.16	0.0761	0.0024	1.831	0.061	0.1776	0.0051	0.65356	1060	22	29	1053	28	35	1085	63	63	99.3396	97.0507
Z_91500_12	7420_TRA_Data 238ReCal 10um April12 data	13.116	66	17630	78.2	0.380946	6.01538	1305.93	25.9259	5.59	0.17	0.0745	0.0027	1.849	0.086	0.1792	0.0062	0.62494	1060	30	35	1071	33	38	1045	75	75	101.038	102.488
Z_91500_13	7420_TRA_Data 238ReCal 10um April12 data	13.124	67	17560	79	0.375949	5.03185	264.06	6.01504	5.65	0.17	0.0757	0.0029	1.874	0.069	0.1794	0.0054	0.39457	1074	25	31	1063	29	36	1085	78	78	98.9758	97.9724
Z_91500_14	7420_TRA_Data 238ReCal 10um April12 data	13.105	67	18120	78.7	0.381194	5.21192	510.423	13.2394	5.59	0.19	0.0753	0.0025	1.869	0.09	0.1788	0.0059	0.68722	1067	32	36	1059	32	39	1064	64	64	99.2502	99.5301
Z_91500_15	7420_TRA_Data 238ReCal 10um April12 data	13.114	67	18720	81.4	0.372727	5.02469	870.698	25.1163	5.58	0.17	0.0745	0.0025	1.832	0.074	0.1794	0.0055	0.59893	1062	27	33	1067	29	36	1049	67	67	100.471	101.716
1 concentration uncertainty c.20%
2&3 data not corrected for common-Pb
4 Concordence calculated as (206Pb-238U age/207Pb-235U age)*100
5 Concordance calculated as (206Pb-238U age/207Pb-206Pb age)*100
Decay constants of Jaffey et al. (1971) Precision measurement of half-lives and specific activities of 235U and 238U. Physical Reviews, C 4: 1889-1906.
Uncertainties quoted are Iolite output of 2SE that is expressed at 2 sigma level for internal errors only and 2SE sys represent propagated systematic error (Internal error + Calculated Excess uncertainity) (Paton et al.(2010) Improved laser ablation U-Pb zircon geochronology through robust downhole fractionation correction: G3, 11, doi: 10.1029/2009GC002618.)

## Sheet: 10um10s
Supplementary Data Table A3: U-Pb data for 10 µm spots, 10 sec integration interval
12/04/2018 Mineral Isotope Laser Laboratory (MILL), Texas Tech University										Data for Tera-Wasserburg plot2				Data for Wetherill plot3					Dates (Ma)3									207-235	207-206			Concordia Age (Ma)		%Age Offset
Identifier	Comments	Duration (s)	#points	206Pb cps	U ppm1	Th/U1	U/Pb1	206Pb/204Pb	2SE	238U/206Pb	2SE	207Pb/206Pb	2SE	207Pb/235U	2SE	206Pb/238U	2SE	Rho	207Pb/235U	2s	2ssys	206Pb/238U	2s	2ssys	207Pb/206Pb	2s	2ssys	% Conc4	% Conc5	Rejects	Age	+2SE	MSWD
FC_1_1	7419_TRA_Data 238ReCal 10um April12 data	8.111	40	141600	578	1.75606	1.07236	3584.81	75.9494	5.3	0.1	0.076	0.0018	1.896	0.055	0.1894	0.0037	0.60443	1081	20	37	1118	20	48	1087	46	98	103.423	102.852
FC_1_2	7419_TRA_Data 238ReCal 10um April12 data	8.122	41	111700	467	0.798501	2.40103	223400	4600	5.455	0.08	0.0761	0.0015	1.847	0.037	0.1837	0.0027	0.44983	1061	13	33	1087	15	45	1092	40	94	102.451	99.5421
FC_1_3	7419_TRA_Data 238ReCal 10um April12 data	8.109	41	88200	364	0.942308	2.01216	3328.3	64.1509	5.41	0.11	0.0739	0.0016	1.821	0.046	0.1851	0.0041	0.52301	1052	17	34	1094	22	48	1041	43	93	103.992	105.091
FC_1_4	7419_TRA_Data 238ReCal 10um April12 data	8.123	41	71600	297	0.424242	4.35484	2922.45	81.6327	5.39	0.12	0.0752	0.002	1.864	0.055	0.1864	0.004	0.47547	1070	20	37	1102	22	48	1065	54	100	102.991	103.474
FC_1_5	7419_TRA_Data 238ReCal 10um April12 data	8.116	41	112600	469	0.729211	2.64374	5774.36	158.974	5.43	0.1	0.0769	0.0012	1.862	0.035	0.1834	0.0035	0.56599	1067	12	33	1085	19	46	1116	32	92	101.687	97.2222		DISCORDANT
FC_1_6	7419_TRA_Data 238ReCal 10um April12 data	8.11	41	118300	470	0.892553	2.06503	11266.7	323.81	5.25	0.12	0.0746	0.0016	1.915	0.044	0.1901	0.0042	0.45801	1085	15	34	1122	23	49	1052	43	97	103.41	106.654
FC_1_7	7419_TRA_Data 238ReCal 10um April12 data	8.111	41	78200	317.7	0.534466	3.62671	12030.8	276.923	5.263	0.085	0.0766	0.0018	1.966	0.047	0.1905	0.003	0.4218	1103	16	35	1124	16	47	1120	48	98	101.904	100.357
FC_1_8	7419_TRA_Data 238ReCal 10um April12 data	8.109	41	79600	330.2	0.564204	3.3591	1129.08	24.1135	5.41	0.1	0.0763	0.0017	1.914	0.04	0.1855	0.0036	0.41592	1085	14	34	1097	19	47	1097	43	96	101.106	100
FC_1_9	7419_TRA_Data 238ReCal 10um April12 data	8.116	41	77800	322.2	0.594351	3.29785	2469.84	44.4444	5.44	0.12	0.0753	0.0016	1.893	0.049	0.1847	0.004	0.60471	1077	17	35	1092	22	48	1069	45	99	101.393	102.152
FC_1_10	7419_TRA_Data 238ReCal 10um April12 data	8.119	41	124900	501	1.43912	1.31565	2135.04	59.8291	5.27	0.12	0.0769	0.0017	2.032	0.049	0.1906	0.0043	0.51648	1125	16	35	1124	23	50	1112	45	97	99.9111	101.079
FishC_1	7420_TRA_Data 238ReCal 10um April12 data	8.125	41	5450	940	0.921277	86.7959	519.048	20	230.1	9	0.0408	0.0043	0.0251	0.0026	0.00435	0.00017	0.093387	25.1	2.5	2.8	28	1.1	1.6	NAN	200	220	111.554	NAN
FishC_2	7420_TRA_Data 238ReCal 10um April12 data	8.118	41	1780	302	1.31291	57.0888	40.9195	2.29885	226	11	0.053	0.012	0.0333	0.0071	0.00438	0.0002	0.18799	34.2	7.2	7.4	28.2	1.3	1.8	120	430	430	82.4561	23.5
FishC_3	7420_TRA_Data 238ReCal 10um April12 data	8.117	41	1890	304	1.27961	69.0909	180	13.3333	218	12	0.052	0.01	0.0355	0.0069	0.00448	0.00022	0.062061	35.2	6.8	6.9	28.8	1.4	1.9	180	390	400	81.8182	16
FishC_4	7420_TRA_Data 238ReCal 10um April12 data	8.132	41	2440	416.1	1.36265	55.48	95.6863	5.09804	229	12	0.0485	0.0078	0.03	0.0049	0.00435	0.00023	0.21574	29.9	4.8	5	28	1.5	1.9	10	300	310	93.6455	280
FishC_5	7420_TRA_Data 238ReCal 10um April12 data	6.8298	34	1910	327	0.818349	81.75	52.3288	3.0137	226	15	0.047	0.012	0.03	0.0068	0.00459	0.0003	0.14814	29.8	6.8	6.9	29.5	1.9	2.3	NAN	430	440	98.9933	NAN		28.188	0.43726	1.2959	-1.01833
FishC_6	7420_TRA_Data 238ReCal 10um April12 data	8.124	41	2590	426	0.64108	133.125	62.4096	3.13253	226	13	0.0417	0.0065	0.0279	0.0046	0.00455	0.00025	0.15807	27.9	4.5	4.7	29.3	1.6	2	NAN	270	290	105.018	NAN
FishC_7	7420_TRA_Data 238ReCal 10um April12 data	8.114	41	1888	309.1	1.18408	66.1884	92.0976	4.78049	222	13	0.042	0.01	0.027	0.0062	0.0045	0.00025	0.070836	28	5.9	6	28.9	1.6	2	NAN	390	390	103.214	NAN
FishC_8	7420_TRA_Data 238ReCal 10um April12 data	8.109	40	2360	423	1.74941	52.875	39.0083	2.47934	241	12	0.052	0.011	0.0306	0.0055	0.00425	0.00021	0.18531	30.5	5.4	5.6	27.4	1.3	1.8	140	360	370	89.8361	19.5714
FishC_9	7420_TRA_Data 238ReCal 10um April12 data	8.136	41	2300	400	1.25	67.7966	77.9661	4.40678	240	12	0.0461	0.0091	0.0274	0.005	0.00424	0.00021	0.090063	27.3	5	5.1	27.3	1.4	1.8	60	330	340	100	45.5
FishC_10	7420_TRA_Data 238ReCal 10um April12 data	8.115	41	1530	268.2	0.847875	88.5149	74.6341	5.36585	239	16	0.0405	0.0098	0.0254	0.0058	0.00434	0.00031	0.1593	25.4	5.8	5.9	27.9	2	2.3	NAN	400	400	109.843	NAN
Plsv_1	7420_TRA_Data 238ReCal 10um April12 data	8.117	41	86400	1213	0.140066	49.7131	1529.2	30.0885	18.96	0.34	0.0528	0.0014	0.3876	0.0091	0.05254	0.00095	0.27347	332.4	6.7	15	330.1	5.8	15	320	62	120	99.3081	103.156
Plsv_2	7420_TRA_Data 238ReCal 10um April12 data	8.114	41	107100	1488	0.129637	49.7659	2406.74	80.8989	18.76	0.3	0.05226	0.00085	0.389	0.0086	0.05344	0.00088	0.4389	333.5	6.3	14	335.6	5.4	15	300	40	110	100.63	111.867
Plsv_3	7420_TRA_Data 238ReCal 10um April12 data	8.12	41	89200	1245	0.122811	59.2857	1667.29	24.2991	18.77	0.3	0.0513	0.001	0.3832	0.0096	0.05341	0.00088	0.41821	329.1	7	15	335.4	5.4	15	246	47	110	101.914	136.341
Plsv_4	7420_TRA_Data 238ReCal 10um April12 data	8.125	41	89700	1219	0.140361	46.1742	7800	182.609	18.32	0.23	0.0528	0.0015	0.3968	0.0092	0.05454	0.00067	0.30759	339.1	6.7	15	342.3	4.1	15	318	66	120	100.944	107.642
Plsv_5	7420_TRA_Data 238ReCal 10um April12 data	8.11	41	86800	1214	0.140033	44.1455	3275.47	67.9245	18.87	0.27	0.0514	0.0012	0.3759	0.0091	0.05309	0.00076	0.20438	323.8	6.7	14	333.4	4.6	15	251	52	110	102.965	132.829	1	335.79	1.4157	3.6656	-0.388609
Plsv_6	7420_TRA_Data 238ReCal 10um April12 data	8.157	41	121200	1662	0.125331	53.961	12757.9	178.947	18.53	0.29	0.0521	0.0011	0.3839	0.009	0.05409	0.00085	0.45165	329.7	6.6	14	339.5	5.2	15	300	48	110	102.972	113.167
Plsv_7	7420_TRA_Data 238ReCal 10um April12 data	8.117	41	95200	1304	0.121549	54.5607	1655.65	41.7391	18.54	0.25	0.0529	0.0013	0.392	0.01	0.05405	0.00074	0.37174	336.9	7.7	16	339.3	4.5	15	326	52	110	100.712	104.08
Plsv_8	7420_TRA_Data 238ReCal 10um April12 data	8.229	41	84800	1192	0.119379	55.4419	5470.97	129.032	19.14	0.27	0.0535	0.0014	0.3831	0.0099	0.0522	0.00078	0.176	330.3	7	14	328	4.8	14	353	53	100	99.3037	92.9178
Plsv_9	7420_TRA_Data 238ReCal 10um April12 data	8.119	41	87800	1201	0.139467	45.6654	1361.24	29.4574	18.6	0.27	0.0543	0.0012	0.3963	0.0083	0.05387	0.0008	0.19281	338.8	6.1	15	338.2	4.9	15	376	51	110	99.8229	89.9468
Plsv_10	7420_TRA_Data 238ReCal 10um April12 data	8.126	41	134300	1882	0.126249	53.3144	2148.8	36.8	18.67	0.31	0.05136	0.00072	0.3693	0.0065	0.05355	0.00094	0.56909	319	4.8	13	336.3	5.7	15	269	37	120	105.423	125.019
R33_1	7419_TRA_Data 238ReCal 10um April12 data	8.121	41	31600	358	1.10615	4.70434	665.263	23.1579	14.81	0.37	0.0544	0.0025	0.488	0.02	0.0673	0.0017	0.24443	403	14	20	420	10	20	360	100	140	104.218	116.667
R33_2	7419_TRA_Data 238ReCal 10um April12 data	8.12	41	30220	336	1.08333	4.97041	361.916	10.5389	14.74	0.31	0.0528	0.0024	0.486	0.019	0.0673	0.0012	0.094699	404	13	19	419.7	7.1	19	340	100	140	103.886	123.441
R33_3	7419_TRA_Data 238ReCal 10um April12 data	8.111	41	22580	254	0.582677	8.49498	694.769	23.3846	15.02	0.34	0.0558	0.0027	0.501	0.027	0.0665	0.0014	0.40673	411	18	24	415.1	8.2	19	430	110	150	100.998	96.5349
R33_4	7419_TRA_Data 238ReCal 10um April12 data	8.109	41	13860	159.5	0.528527	9.84568	205.333	4.44444	15.29	0.53	0.0574	0.0033	0.508	0.031	0.0657	0.0022	0.33347	419	20	25	410	13	21	480	130	160	97.852	85.4167
R33_5	7419_TRA_Data 238ReCal 10um April12 data	8.15	41	15810	175.2	0.527397	9.89831	313.069	7.12871	14.63	0.37	0.0545	0.0031	0.49	0.031	0.0673	0.0018	0.2862	403	21	26	420	11	20	350	120	160	104.218	120		416.57	2.9282	1.9354	-0.651085
R33_6	7419_TRA_Data 238ReCal 10um April12 data	8.159	41	39100	447	0.567562	8.76471	1281.97	39.3443	14.93	0.31	0.0543	0.0018	0.494	0.015	0.0673	0.0014	0.24644	406.9	9.9	18	419.5	8.4	19	384	75	120	103.097	109.245
R33_7	7420_TRA_Data 238ReCal 10um April12 data	8.119	41	12620	137.6	0.537064	8.93506	254.949	6.66667	14.63	0.48	0.0532	0.003	0.498	0.035	0.0686	0.0022	0.45629	412	23	27	427	13	22	330	120	150	103.641	129.394
R33_8	7420_TRA_Data 238ReCal 10um April12 data	8.116	41	13730	148.3	0.540796	10.5929	295.269	6.66667	14.47	0.5	0.0515	0.0038	0.491	0.031	0.0695	0.0024	0.18771	408	20	25	433	14	23	270	160	180	106.127	160.37
R33_9	7420_TRA_Data 238ReCal 10um April12 data	8.119	41	19590	220.9	0.541421	8.69685	346.726	10.7965	15.42	0.55	0.0535	0.0027	0.501	0.03	0.0652	0.0022	0.31228	410	20	25	407	13	21	360	120	160	99.2683	113.056
R33_10	7420_TRA_Data 238ReCal 10um April12 data	8.144	41	17560	192.9	0.598237	8.84862	816.744	15.3488	14.61	0.43	0.0527	0.0029	0.515	0.028	0.0686	0.0019	0.4941	420	19	25	427	11	21	300	120	160	101.667	142.333
Temora_1	7419_TRA_Data 238ReCal 10um April12 data	8.116	41	26600	306	0.654575	7.68844	901.695	22.3729	15.22	0.31	0.0563	0.0026	0.526	0.018	0.0657	0.0014	0.083747	428	12	20	410.3	8.5	19	450	110	140	95.8645	91.1778
Temora_2	7419_TRA_Data 238ReCal 10um April12 data	8.12	41	32500	366	0.625683	7.21893	2096.77	96.7742	14.86	0.35	0.0564	0.002	0.539	0.022	0.0674	0.0015	0.57991	437	14	22	420.2	9.2	20	463	76	120	96.1556	90.7559
Temora_3	7419_TRA_Data 238ReCal 10um April12 data	8.119	41	26810	313.5	0.431579	11.3587	530.891	13.0693	15.31	0.44	0.0571	0.0024	0.519	0.023	0.0655	0.002	0.56735	427	16	23	409	12	21	467	94	130	95.7845	87.5803
Temora_4	7419_TRA_Data 238ReCal 10um April12 data	8.12	41	36120	397	0.427708	11.9578	793.846	17.8022	14.75	0.33	0.0532	0.0019	0.519	0.021	0.0681	0.0015	0.47999	426	13	20	424.7	9.2	20	336	83	130	99.6948	126.399
Temora_5	7419_TRA_Data 238ReCal 10um April12 data	8.121	41	34760	410	0.415366	12.0235	3022.61	61.7391	15.52	0.35	0.0556	0.0021	0.501	0.018	0.0645	0.0015	0.46918	411	12	20	402.8	9.3	19	416	82	130	98.0049	96.8269		414.61	3.0211	2.6656	-0.520658
Temora_6	7419_TRA_Data 238ReCal 10um April12 data	8.123	41	34790	409	0.434719	11.8895	4092.94	95.2941	15.31	0.4	0.0573	0.0022	0.518	0.023	0.0652	0.0017	0.44086	423	15	22	407	10	20	480	85	130	96.2175	84.7917
Temora_7	7419_TRA_Data 238ReCal 10um April12 data	8.217	41	31220	353	0.476771	11.1006	1274.29	26.1224	15.11	0.32	0.0558	0.0019	0.506	0.019	0.0662	0.0013	0.4623	415	13	20	413.4	8	19	455	75	120	99.6145	90.8571
Temora_8	7419_TRA_Data 238ReCal 10um April12 data	8.115	41	27480	313.3	0.441111	11.4343	662.169	15.6627	15.1	0.42	0.0564	0.0026	0.509	0.026	0.0667	0.0019	0.46972	419	18	24	416	11	20	450	100	140	99.284	92.4444
Temora_9	7419_TRA_Data 238ReCal 10um April12 data	8.113	40	31180	354.1	0.421067	12.5567	1272.65	34.6939	15.07	0.32	0.0515	0.0022	0.467	0.025	0.0662	0.0014	0.47323	388	17	23	413.1	8.7	19	244	96	140	106.469	169.303
Temora_10	7419_TRA_Data 238ReCal 10um April12 data	8.117	41	21790	259	0.651737	8.22222	596.986	12.6027	15.52	0.46	0.0562	0.0028	0.49	0.027	0.0647	0.002	0.46827	403	18	24	404	12	20	420	110	150	100.248	96.1905
Z_91500_1	7419_TRA_Data 238ReCal 10um April12 data	8.113	41	18740	81.3	0.360148	5.27922	2883.08	66.1538	5.64	0.23	0.0741	0.0029	1.808	0.086	0.175	0.0071	0.56079	1044	31	43	1038	39	56	1022	84	130	99.4253	101.566
Z_91500_2	7419_TRA_Data 238ReCal 10um April12 data	8.119	41	18330	79.3	0.374779	5.28667	2444	46.6667	5.68	0.22	0.0771	0.0025	1.892	0.093	0.1759	0.0067	0.73244	1079	33	45	1044	37	55	1110	64	110	96.7563	94.0541
Z_91500_3	7419_TRA_Data 238ReCal 10um April12 data	8.115	41	18540	78.9	0.381749	5.47917	1059.43	21.1429	5.58	0.2	0.0737	0.003	1.85	0.1	0.1802	0.0067	0.61416	1059	35	46	1067	36	55	1024	89	130	100.755	104.199
Z_91500_4	7419_TRA_Data 238ReCal 10um April12 data	8.125	41	20360	83.5	0.389222	5.18634	515.443	14.4304	5.4	0.2	0.0762	0.0033	1.892	0.094	0.1875	0.0067	0.54609	1073	33	45	1107	37	57	1075	88	130	103.169	102.977
Z_91500_5	7419_TRA_Data 238ReCal 10um April12 data	8.116	41	18880	79.7	0.371142	5.17532	3432.73	76.3636	5.55	0.26	0.0743	0.0027	1.819	0.09	0.1811	0.0083	0.62395	1053	33	45	1071	45	62	1062	72	110	101.709	100.847
Z_91500_6	7419_TRA_Data 238ReCal 10um April12 data	8.113	41	18570	76.2	0.392913	5.14865	5305.71	128.571	5.45	0.24	0.0722	0.0027	1.86	0.1	0.1855	0.0083	0.73866	1062	36	47	1096	45	62	983	79	120	103.202	111.495
Z_91500_7	7419_TRA_Data 238ReCal 10um April12 data	8.117	41	19830	84.4	0.354265	5.7415	574.783	19.7101	5.65	0.21	0.0745	0.0032	1.835	0.086	0.1767	0.0065	0.51053	1053	31	43	1048	36	54	1030	89	130	99.5252	101.748
Z_91500_8	7419_TRA_Data 238ReCal 10um April12 data	8.122	41	19550	82.5	0.365333	5.72917	710.909	15.6364	5.66	0.21	0.0754	0.0027	1.82	0.11	0.1779	0.0069	0.86122	1051	39	48	1055	38	56	1074	75	120	100.381	98.2309		1063.4	8.0969	1.5122	0.0941265
Z_91500_9	7419_TRA_Data 238ReCal 10um April12 data	8.122	41	18270	76.2	0.387139	5.60294	420	9.88506	5.57	0.25	0.0779	0.003	1.88	0.093	0.1817	0.008	0.69758	1069	33	45	1075	43	60	1165	73	110	100.561	92.2747
Z_91500_10	7420_TRA_Data 238ReCal 10um April12 data	8.119	41	19600	84.8	0.349057	4.93023	2063.16	62.1053	5.75	0.27	0.0722	0.0036	1.83	0.1	0.1777	0.0083	0.55189	1064	36	47	1053	45	61	990	110	150	98.9662	106.364
Z_91500_11	7420_TRA_Data 238ReCal 10um April12 data	8.108	41	20030	88.3	0.352208	5.66026	8012	216	5.9	0.2	0.076	0.003	1.856	0.078	0.1704	0.006	0.53738	1068	26	39	1013	33	52	1089	80	120	94.8502	93.0211
Z_91500_12	7420_TRA_Data 238ReCal 10um April12 data	8.116	41	18280	76	0.386842	6.22951	599.344	15.4098	5.57	0.21	0.072	0.0031	1.838	0.098	0.1823	0.0072	0.67233	1066	35	46	1078	39	57	977	87	120	101.126	110.338
Z_91500_13	7420_TRA_Data 238ReCal 10um April12 data	8.124	41	18340	78.5	0.378089	5.06452	160.175	5.32751	5.63	0.19	0.0752	0.0033	1.857	0.077	0.1767	0.0061	0.35832	1077	26	39	1048	34	53	1065	86	120	97.3073	98.4038
Z_91500_14	7420_TRA_Data 238ReCal 10um April12 data	8.105	41	19470	79.3	0.380832	5.14935	338.609	9.04348	5.64	0.27	0.0764	0.003	1.86	0.13	0.1785	0.0086	0.79773	1065	45	54	1057	47	62	1100	77	110	99.2488	96.0909
Z_91500_15	7420_TRA_Data 238ReCal 10um April12 data	8.114	41	19880	81.2	0.371552	5.13924	779.608	21.1765	5.49	0.16	0.0752	0.0035	1.84	0.11	0.1836	0.0053	0.63459	1054	38	48	1086	29	51	1062	90	120	103.036	102.26
1 concentration uncertainty c.20%
2&3 data not corrected for common-Pb
4 Concordence calculated as (206Pb-238U age/207Pb-235U age)*100
5 Concordance calculated as (206Pb-238U age/207Pb-206Pb age)*100
Decay constants of Jaffey et al. (1971) Precision measurement of half-lives and specific activities of 235U and 238U. Physical Reviews, C 4: 1889-1906.
Uncertainties quoted are Iolite output of 2SE that is expressed at 2 sigma level for internal errors only and 2SE sys represent propagated systematic error (Internal error + Calculated Excess uncertainity) (Paton et al.(2010) Improved laser ablation U-Pb zircon geochronology through robust downhole fractionation correction: G3, 11, doi: 10.1029/2009GC002618.)

## Sheet: 10um07s
Supplementary Data Table A3: U-Pb data for 10 µm spots, 7 sec integration interval
12/04/2018 Mineral Isotope Laser Laboratory (MILL), Texas Tech University											Data for Tera-Wasserburg plot2			Data for Wetherill plot3					Dates (Ma)3									207-235	207-206			Concordia Age (Ma)		%Age Offset
Identifier	Comments	Duration (s)	#points	206Pb cps	U ppm1	Th/U1	U/Pb1	206Pb/204Pb	2SE	238U/206Pb	2SE	207Pb/206Pb	2SE	207Pb/235U	2SE	206Pb/238U	2SE	Rho	207Pb/235U	2s	2ssys	206Pb/238U	2s	2ssys	207Pb/206Pb	2s	2ssys	% Conc4	% Conc5	Rejects	Age	+2SE	MSWD
FC_1_1	7419_TRA_Data 238ReCal 10um April12 data	5.111	25	148400	598	1.78595	1.07554	3307.87	69.6629	5.31	0.11	0.074	0.0022	1.866	0.061	0.1887	0.0039	0.3678	1068	22	22	1114	21	42	1035	60	60	104.307	107.633
FC_1_2	7419_TRA_Data 238ReCal 10um April12 data	5.122	26	115600	479	0.80501	2.47417	10952.4	228.571	5.479	0.088	0.076	0.0019	1.868	0.04	0.1828	0.0029	0.0090007	1069	14	14	1082	16	39	1090	49	49	101.216	99.2661
FC_1_3	7419_TRA_Data 238ReCal 10um April12 data	5.109	26	91200	368	0.982337	1.98704	2649.28	63.7681	5.4	0.13	0.0754	0.0018	1.85	0.058	0.1856	0.0044	0.56927	1062	21	21	1097	24	43	1074	48	48	103.296	102.142
FC_1_4	7419_TRA_Data 238ReCal 10um April12 data	5.123	26	75200	308.2	0.453277	4.1705	7936.84	178.947	5.37	0.15	0.0761	0.0026	1.901	0.055	0.1872	0.0052	0.33635	1085	18	18	1106	28	46	1087	69	69	101.935	101.748		NA	NA	NA	NA
FC_1_5	7419_TRA_Data 238ReCal 10um April12 data	5.116	26	118700	482	0.749378	2.58584	2346.53	49.505	5.42	0.11	0.0771	0.0015	1.951	0.055	0.1842	0.0042	0.67685	1098	19	19	1090	23	42	1121	37	37	99.2714	97.2346
FC_1_6	7419_TRA_Data 238ReCal 10um April12 data	5.11	26	124700	482	0.896888	2.11961	22545.5	581.818	5.22	0.15	0.075	0.0016	1.978	0.047	0.1913	0.0052	0.56545	1107	16	16	1128	28	47	1063	44	44	101.897	106.115
FC_1_7	7419_TRA_Data 238ReCal 10um April12 data	5.111	26	82000	323.3	0.552428	3.51413	1305.6	32	5.21	0.12	0.0761	0.0023	1.995	0.066	0.1925	0.0042	0.47608	1112	22	22	1135	23	44	1116	60	60	102.068	101.703
FC_1_8	7419_TRA_Data 238ReCal 10um April12 data	5.109	25	82500	330.9	0.582049	3.40082	1411.97	29.0598	5.4	0.14	0.0787	0.0023	1.978	0.061	0.186	0.005	0.40232	1111	20	20	1099	27	45	1158	57	57	98.9199	94.905
FC_1_9	7419_TRA_Data 238ReCal 10um April12 data	5.116	26	79700	322.9	0.607309	3.32887	1030.97	19.3548	5.46	0.13	0.0768	0.0021	1.938	0.064	0.1839	0.0047	0.61056	1093	22	22	1088	25	44	1108	55	55	99.5425	98.1949
FC_1_10	7419_TRA_Data 238ReCal 10um April12 data	5.119	26	131000	515	1.42524	1.3807	1049	31.3253	5.29	0.15	0.078	0.0023	2.037	0.06	0.19	0.0052	0.51832	1131	19	19	1121	28	46	1138	57	57	99.1158	98.5062
Fish_can_1	7420_TRA_Data 238ReCal 10um April12 data	5.125	26	5670	933	0.935691	86.8715	592.632	26.3158	229	13	0.0416	0.0052	0.0253	0.003	0.00439	0.00023	0.20598	25.3	2.9	2.9	28.3	1.5	1.8	NAN	230	230	111.858	NAN
Fish_can_2	7420_TRA_Data 238ReCal 10um April12 data	5.118	26	1880	311	1.23408	62.7016	20.791	1.24294	223	13	0.049	0.015	0.0312	0.0093	0.00442	0.00026	0.21834	32.9	9.6	9.6	28.4	1.7	2	20	550	550	86.3222	142
Fish_can_3	7420_TRA_Data 238ReCal 10um April12 data	5.117	26	2120	345	1.31304	70.4082	380	21.8182	228	11	0.053	0.013	0.0353	0.0089	0.00445	0.00022	0.29885	35	8.8	8.8	28.6	1.4	1.8	310	480	480	81.7143	9.22581
Fish_can_4	7420_TRA_Data 238ReCal 10um April12 data	5.132	26	2460	402.6	1.4158	52.9737	4840	340	224	14	0.051	0.01	0.0288	0.0054	0.00444	0.0003	0.14095	28.8	5.3	5.3	28.5	1.9	2.2	170	360	360	98.9583	16.7647
Fish_can_5	7420_TRA_Data 238ReCal 10um April12 data	5.122	25	1970	321.6	0.813122	86.2198	62.5397	3.80952	224	16	0.043	0.01	0.0313	0.0072	0.0046	0.00034	0.099731	31.2	7	7	29.6	2.2	2.4	NAN	430	430	94.8718	NAN		28.582	0.51782	0.92271	0.365194
Fish_can_6	7420_TRA_Data 238ReCal 10um April12 data	5.124	26	2540	419	0.620048	116.389	27.6503	1.42077	230	14	0.0395	0.0071	0.0271	0.0056	0.00445	0.00028	0.28016	27	5.5	5.5	28.6	1.8	2	NAN	320	320	105.926	NAN
Fish_can_7	7420_TRA_Data 238ReCal 10um April12 data	5.114	26	1970	304	1.17105	70.6977	188.571	13.3333	218	16	0.04	0.01	0.0273	0.0056	0.00465	0.00031	0.20304	27.3	5.5	5.5	29.9	2	2.3	NAN	390	390	109.524	NAN
Fish_can_8	7420_TRA_Data 238ReCal 10um April12 data	5.109	25	2220	378	1.65608	59.0625	26.4671	1.79641	239	15	0.051	0.014	0.0299	0.0072	0.00427	0.00025	0.16939	29.8	7.1	7.1	27.5	1.6	1.9	130	460	460	92.2819	21.1538
Fish_can_9	7420_TRA_Data 238ReCal 10um April12 data	5.136	26	2420	404	1.19554	69.6552	117.073	7.80488	231	12	0.0457	0.0058	0.0287	0.0041	0.00435	0.00023	0.32528	28.7	4	4	27.9	1.5	1.8	110	300	300	97.2125	25.3636
Fish_can_10	7420_TRA_Data 238ReCal 10um April12 data	5.115	26	1670	267.6	0.837818	87.451	30.0917	2.01835	226	18	0.044	0.011	0.0277	0.0065	0.0046	0.00036	0.21362	27.6	6.4	6.4	29.6	2.3	2.6	NAN	370	370	107.246	NAN
Plesovice_1	7420_TRA_Data 238ReCal 10um April12 data	5.117	26	88000	1184	0.136233	50.5983	9200	221.053	18.81	0.54	0.0548	0.0017	0.383	0.012	0.0531	0.0015	0.34886	329.2	8.6	8.6	333.4	9.1	15	409	73	73	101.276	81.5159
Plesovice_2	7420_TRA_Data 238ReCal 10um April12 data	5.114	26	113800	1542	0.123671	55.6679	10761.9	295.238	18.9	0.35	0.0529	0.0011	0.3689	0.0086	0.05302	0.00098	0.30222	318.7	6.4	6.4	333	6	13	318	48	48	104.487	104.717
Plesovice_3	7420_TRA_Data 238ReCal 10um April12 data	5.12	26	90300	1223	0.118888	59.951	3168.42	56.1404	18.72	0.37	0.0517	0.0013	0.367	0.011	0.0535	0.0011	0.43857	316.9	8.4	8.4	336.2	6.5	13	282	52	52	106.09	119.22
Plesovice_4	7420_TRA_Data 238ReCal 10um April12 data	5.125	26	93400	1225	0.133714	49.1968	5027.03	145.946	18.13	0.3	0.0518	0.0014	0.3739	0.0078	0.05524	0.00092	0.28761	322.4	5.8	5.8	346.6	5.6	13	267	64	64	107.506	129.813
Plesovice_5	7420_TRA_Data 238ReCal 10um April12 data	5.11	26	88900	1197	0.135171	45.1698	4307.32	82.9268	18.62	0.32	0.0503	0.0014	0.36	0.011	0.05362	0.0009	0.40095	312.2	8	8	336.7	5.5	13	216	65	65	107.848	155.88	2	334.16	1.8875	4.6891	-0.872145
Plesovice_6	7420_TRA_Data 238ReCal 10um April12 data	5.157	26	122300	1618	0.121384	58.4116	3088.61	55.6962	18.4	0.34	0.0519	0.0011	0.3672	0.0097	0.0544	0.001	0.33167	318.9	7.6	7.6	341.7	6.1	13	274	51	51	107.15	124.708
Plesovice_7	7420_TRA_Data 238ReCal 10um April12 data	5.117	26	100300	1312	0.120122	56.0684	1442.34	36.4964	18.48	0.35	0.0529	0.0014	0.384	0.013	0.0542	0.001	0.46861	331.3	8.7	8.7	340.4	6.3	13	316	59	59	102.747	107.722
Plesovice_8	7420_TRA_Data 238ReCal 10um April12 data	5.229	26	86800	1178	0.116384	61.6754	1855.91	53.7634	19.17	0.4	0.0523	0.0018	0.372	0.014	0.0523	0.0011	0.1996	321	10	10	328.6	6.7	13	289	79	79	102.368	113.702
Plesovice_9	7420_TRA_Data 238ReCal 10um April12 data	5.119	26	90700	1215	0.136296	47.6471	1638.53	51.3761	18.62	0.35	0.0533	0.0017	0.382	0.011	0.0534	0.001	0.12386	328	8.3	8.3	335.2	6.3	13	330	70	70	102.195	101.576
Plesovice_10	7420_TRA_Data 238ReCal 10um April12 data	5.126	26	137800	1828	0.126149	52.9855	2615.24	64.7619	18.7	0.44	0.05041	0.0009	0.3618	0.008	0.0537	0.0012	0.67841	313.5	6	6	336.9	7.6	14	220	37	37	107.464	153.136
R33_1	7419_TRA_Data 238ReCal 10um April12 data	5.121	26	33800	375	1.08267	4.90196	641.905	20.9524	14.87	0.53	0.0528	0.0025	0.475	0.018	0.0672	0.0022	0.33823	395	12	12	419	14	20	300	110	110	106.076	139.667
R33_2	7419_TRA_Data 238ReCal 10um April12 data	5.12	26	31300	341	1.07918	5.12012	365.68	13.0178	14.9	0.29	0.05	0.0029	0.469	0.025	0.0673	0.0013	0.010784	390	17	17	419.6	7.7	16	210	120	120	107.59	199.81
R33_3	7419_TRA_Data 238ReCal 10um April12 data	5.111	26	23950	264	0.572348	8.74172	1061.33	34.6667	15.09	0.4	0.0526	0.0032	0.472	0.037	0.0665	0.0017	0.4355	402	25	25	415	10	18	320	140	140	103.234	129.688
R33_4	7419_TRA_Data 238ReCal 10um April12 data	5.109	26	14050	159.1	0.527341	10.2645	212.366	5.64885	15.56	0.57	0.0545	0.0044	0.482	0.04	0.0648	0.0023	0.36423	397	28	28	404	14	20	340	180	180	101.763	118.824
R33_5	7419_TRA_Data 238ReCal 10um April12 data	5.15	26	16020	172.5	0.518841	10.0291	316.238	9.30693	14.55	0.49	0.0507	0.0034	0.464	0.036	0.0669	0.0023	0.28462	385	25	25	417	14	20	230	150	150	108.312	181.304		414.72	3.6227	3.7217	-1.0923
R33_6	7419_TRA_Data 238ReCal 10um April12 data	5.159	26	41630	461	0.5718	9.23848	466.215	8.13559	14.72	0.39	0.0541	0.0025	0.503	0.021	0.0677	0.002	0.26277	413	14	14	422	12	19	356	96	96	102.179	118.539
R33_7	7420_TRA_Data 238ReCal 10um April12 data	5.119	26	12660	131	0.549618	8.61842	926.667	31.8519	14.31	0.66	0.0549	0.0033	0.525	0.04	0.0693	0.003	0.48803	432	25	25	432	18	23	380	130	130	100	113.684
R33_8	7420_TRA_Data 238ReCal 10um April12 data	5.116	26	13760	143.6	0.556407	10.9618	151.05	3.9779	14.48	0.6	0.0483	0.0031	0.491	0.031	0.0684	0.0026	0.14603	404	21	21	427	15	21	100	140	140	105.693	427
R33_9	7420_TRA_Data 238ReCal 10um April12 data	5.119	26	20680	221	0.535747	8.98374	907.111	31.1111	14.72	0.73	0.0527	0.0034	0.479	0.03	0.0681	0.0031	0.35659	396	20	20	425	19	24	290	140	140	107.323	146.552
R33_10	7420_TRA_Data 238ReCal 10um April12 data	5.144	25	17960	191.5	0.5953	9.11905	678.491	14.717	14.63	0.53	0.0546	0.0037	0.52	0.036	0.0688	0.0025	0.52463	424	24	24	429	15	21	360	150	150	101.179	119.167
Temora_1	7419_TRA_Data 238ReCal 10um April12 data	5.116	26	27490	308	0.674026	7.54902	933.22	23.3898	15.18	0.52	0.057	0.0035	0.522	0.022	0.0658	0.0021	0.0012181	426	15	15	411	13	19	460	140	140	96.4789	89.3478
Temora_2	7419_TRA_Data 238ReCal 10um April12 data	5.12	25	35710	399	0.649123	7.48593	817.471	16.7816	14.97	0.41	0.056	0.0024	0.517	0.027	0.0667	0.0018	0.59666	422	18	18	416	11	18	455	91	91	98.5782	91.4286
Temora_3	7419_TRA_Data 238ReCal 10um April12 data	5.119	26	28010	319.3	0.42186	11.363	417.895	11.7293	15.26	0.57	0.0551	0.0029	0.486	0.03	0.0655	0.0027	0.69021	406	19	19	409	16	22	390	120	120	100.739	104.872
Temora_4	7419_TRA_Data 238ReCal 10um April12 data	5.12	26	37270	398	0.440955	12.0606	1736.28	33.9535	14.43	0.46	0.0532	0.0027	0.509	0.024	0.0697	0.0023	0.33471	417	16	16	435	14	20	340	120	120	104.317	127.941
Temora_5	7419_TRA_Data 238ReCal 10um April12 data	5.121	26	35780	405.2	0.417572	13.7356	666.355	15.514	15.47	0.42	0.0546	0.0024	0.481	0.019	0.0645	0.0019	0.34182	398	13	13	403	11	18	398	90	90	101.256	101.256
Temora_6	7419_TRA_Data 238ReCal 10um April12 data	5.123	26	35710	413	0.43632	12.866	10154.3	251.429	15.77	0.5	0.0551	0.0031	0.48	0.029	0.0638	0.002	0.35878	397	20	20	398	12	19	390	130	130	100.252	102.051	2	411.67	4.1393	3.6824	-1.22607
Temora_7	7419_TRA_Data 238ReCal 10um April12 data	5.217	26	31470	348	0.46954	11.1897	1106.32	31.9298	15.06	0.41	0.0541	0.0029	0.476	0.026	0.0662	0.0017	0.45043	395	18	18	413	10	18	350	120	120	104.557	118
Temora_8	7419_TRA_Data 238ReCal 10um April12 data	5.115	26	27340	303	0.437624	11.8824	694.43	22.7848	14.84	0.57	0.0553	0.0032	0.503	0.037	0.068	0.0026	0.636	412	25	25	424	16	22	420	120	120	102.913	100.952
Temora_9	7419_TRA_Data 238ReCal 10um April12 data	5.113	25	29770	331.9	0.416692	12.0691	735.556	19.7531	14.98	0.33	0.049	0.0026	0.435	0.027	0.067	0.0015	0.44764	366	19	19	417.7	9.1	17	140	120	120	114.126	298.357
Temora_10	7419_TRA_Data 238ReCal 10um April12 data	5.117	26	22220	260	0.648462	8.36013	276.398	7.70186	15.75	0.68	0.0561	0.0035	0.487	0.037	0.0642	0.0028	0.58106	401	25	25	401	17	22	420	140	140	100	95.4762
Z_91500_1	7419_TRA_Data 238ReCal 10um April12 data	5.113	26	18200	79.7	0.350063	5.0443	2434.67	80	5.81	0.24	0.0742	0.0032	1.839	0.084	0.1721	0.0082	0.71596	1057	31	31	1022	45	56	1049	86	86	96.6887	97.4261
Z_91500_2	7419_TRA_Data 238ReCal 10um April12 data	5.119	25	18040	77.9	0.378691	5.19333	35980	1000	5.77	0.27	0.076	0.0033	1.85	0.1	0.1755	0.0085	0.66181	1071	39	39	1041	46	58	1080	89	89	97.1989	96.3889
Z_91500_3	7419_TRA_Data 238ReCal 10um April12 data	5.115	26	18260	77.4	0.386305	5.41259	1464.8	44	5.51	0.25	0.0745	0.004	1.88	0.13	0.1835	0.0083	0.57665	1079	42	42	1085	45	57	1050	110	110	100.556	103.333
Z_91500_4	7419_TRA_Data 238ReCal 10um April12 data	5.125	26	21530	87.7	0.387685	5.41358	424.554	14.0594	5.49	0.26	0.0745	0.0042	1.85	0.11	0.1847	0.0087	0.55476	1061	37	37	1091	47	59	1060	110	110	102.828	102.925
Z_91500_5	7419_TRA_Data 238ReCal 10um April12 data	5.116	26	18680	78.3	0.371648	5.4375	298.56	10.4	5.64	0.36	0.0753	0.0043	1.83	0.12	0.179	0.011	0.50895	1052	42	42	1062	60	69	1130	120	120	100.951	93.9823
Z_91500_6	7419_TRA_Data 238ReCal 10um April12 data	5.113	26	18600	76	0.386842	5.39007	949.231	32.8205	5.56	0.31	0.0737	0.0037	1.84	0.12	0.183	0.01	0.71982	1054	43	43	1084	54	65	1010	100	100	102.846	107.327
Z_91500_7	7419_TRA_Data 238ReCal 10um April12 data	5.117	26	21070	87.3	0.355097	5.25904	1076.41	38.9744	5.72	0.34	0.0759	0.0037	1.86	0.11	0.1735	0.0098	0.61547	1061	40	40	1030	54	64	1070	100	100	97.0782	96.2617		1063.6	9.8021	1.1453	0.112952
Z_91500_8	7419_TRA_Data 238ReCal 10um April12 data	5.122	26	19860	78.7	0.379797	5.7029	615.077	14.4615	5.39	0.21	0.0746	0.0032	1.85	0.12	0.1852	0.0079	0.88357	1059	42	42	1095	43	56	1041	87	87	103.399	105.187
Z_91500_9	7419_TRA_Data 238ReCal 10um April12 data	5.122	25	17750	70.6	0.395184	5.22963	452.152	11.1392	5.52	0.33	0.0756	0.0044	1.85	0.13	0.185	0.011	0.6652	1057	45	45	1093	59	69	1060	120	120	103.406	103.113
Z_91500_10	7420_TRA_Data 238ReCal 10um April12 data	5.119	26	20450	84.8	0.352594	4.71111	417.526	14.6392	5.64	0.35	0.0744	0.0029	1.85	0.11	0.181	0.011	0.71764	1060	40	40	1072	59	69	1040	77	77	101.132	103.077
Z_91500_11	7420_TRA_Data 238ReCal 10um April12 data	5.108	26	20900	88.9	0.359955	5.52174	354.872	9.91453	5.86	0.24	0.0757	0.0035	1.848	0.076	0.1706	0.0072	0.54998	1067	30	30	1015	40	52	1067	97	97	95.1265	95.1265
Z_91500_12	7420_TRA_Data 238ReCal 10um April12 data	5.116	26	18890	76.2	0.363517	6.096	1776.19	67.619	5.57	0.25	0.0735	0.0038	1.83	0.13	0.1818	0.0088	0.68489	1051	45	45	1076	48	60	1010	110	110	102.379	106.535
Z_91500_13	7420_TRA_Data 238ReCal 10um April12 data	5.124	26	19730	80.9	0.352287	5.39333	330.598	14.188	5.7	0.28	0.076	0.0039	1.856	0.078	0.1782	0.0087	0.36964	1064	28	28	1056	48	59	1120	100	100	99.2481	94.2857
Z_91500_14	7420_TRA_Data 238ReCal 10um April12 data	5.105	26	20160	79.7	0.387955	5.42177	452.135	13.0337	5.63	0.33	0.0762	0.0037	1.86	0.16	0.177	0.01	0.84825	1069	56	56	1048	56	66	1101	92	92	98.0355	95.1862
Z_91500_15	7420_TRA_Data 238ReCal 10um April12 data	5.114	26	20480	82	0.372439	5	545.333	15.2	5.5	0.18	0.0738	0.0035	1.84	0.12	0.181	0.007	0.67649	1074	41	41	1072	38	52	1060	110	110	99.8138	101.132
1 concentration uncertainty c.20%
2&3 data not corrected for common-Pb
4 Concordence calculated as (206Pb-238U age/207Pb-235U age)*100
5 Concordance calculated as (206Pb-238U age/207Pb-206Pb age)*100
Decay constants of Jaffey et al. (1971) Precision measurement of half-lives and specific activities of 235U and 238U. Physical Reviews, C 4: 1889-1906.
Uncertainties quoted are Iolite output of 2SE that is expressed at 2 sigma level for internal errors only and 2SE sys represent propagated systematic error (Internal error + Calculated Excess uncertainity) (Paton et al.(2010) Improved laser ablation U-Pb zircon geochronology through robust downhole fractionation correction: G3, 11, doi: 10.1029/2009GC002618.)
