# Supplementary material for: Accuracy and precision of U–Pb zircon geochronology at high spatial resolution (7–20 μm spots) by laser ablation-ICP-single-collector-sector-field-mass spectrometry
Source: Royal Society of Chemistry journal article supplement (doi:10.1039/c8ja00321a), 2018-11-21
Supplement: c8ja00321a4.xlsx [file c8ja00321a4.xlsx]

## Sheet: 07um28s FMT A4
Supplementary Data Table A4: U-Pb data for 7 µm spots, 28 sec integration interval
12/04/2018 Mineral Isotope Laser Laboratory (MILL), Texas Tech University										Data for Tera-Wasserburg plot2				Data for Wetherill plot3					Dates (Ma)3									207-235	207-206			Concordia Age (Ma)		%Age Offset
Identifier	Comments	Duration (s)	#points	206Pb cps	U ppm1	Th/U1	U/Pb1	206Pb/204Pb	2SE	238U/206Pb	2SE	207Pb/206Pb	2SE	207Pb/235U	2SE	206Pb/238U	2SE	Rho	207Pb/235U	2s	2ssys	206Pb/238U	2s	2ssys	207Pb/206Pb	2s	2ssys	% Conc4	% Conc5	Rejects	Age	+2SE	MSWD
FC_1_1	7423_TRA_Data 238ReCal 07um April12 data	26.113	132	84600	561	1.52941	1.15432	1990.59	84.7059	5.01	0.069	0.0759	0.00096	2.123	0.035	0.2002	0.0029	0.71472	1157	12	12	1176	15	30	1098	25	25	101.642	107.104
FC_1_2	7423_TRA_Data 238ReCal 07um April12 data	26.114	131	73800	498	0.76506	2.34353	2270.77	89.2308	5.07	0.077	0.07624	0.00098	2.107	0.04	0.1981	0.0031	0.72424	1153	13	13	1164	17	31	1102	26	26	100.954	105.626
FC_1_3	7423_TRA_Data 238ReCal 07um April12 data	26.155	132	89500	603	1.89884	0.937792	25571.4	1200	4.953	0.066	0.07586	0.00093	2.154	0.034	0.2016	0.0027	0.69419	1168	11	11	1183	15	30	1096	24	24	101.284	107.938
FC_1_4	7423_TRA_Data 238ReCal 07um April12 data	26.118	131	111600	767	1.87093	0.927449	14880	480	5.073	0.063	0.07532	0.00079	2.097	0.03	0.1972	0.0025	0.69195	1146.3	9.8	9.8	1160	13	29	1074	21	21	101.195	108.007
FC_1_5	7423_TRA_Data 238ReCal 07um April12 data	26.111	132	42100	281	0.647687	2.2126	2158.97	97.4359	4.95	0.1	0.084	0.0023	2.371	0.07	0.2039	0.0044	0.46876	1238	22	22	1195	23	35	1276	55	55	96.5267	93.652
FC_1_6	7423_TRA_Data 238ReCal 07um April12 data	26.124	131	83200	572	1.34615	1.32102	6162.96	288.889	4.969	0.076	0.07586	0.00094	2.132	0.036	0.201	0.0031	0.68635	1158	12	12	1180	16	31	1089	26	26	101.9	108.356	3	1155.6	4.3122	5.2487	5.15014
FC_1_7	7423_TRA_Data 238ReCal 07um April12 data	26.13	132	63300	437	0.837529	2.16658	3421.62	129.73	5.11	0.078	0.07587	0.00098	2.072	0.035	0.1943	0.0029	0.67139	1141	12	12	1146	15	30	1089	27	27	100.438	105.234
FC_1_8	7423_TRA_Data 238ReCal 07um April12 data	26.129	132	61100	412	1.39078	1.27554	4888	240	5.026	0.079	0.0773	0.0011	2.151	0.037	0.1986	0.0032	0.65953	1169	12	12	1167	17	31	1129	27	27	99.8289	103.366
FC_1_9	7423_TRA_Data 238ReCal 07um April12 data	26.197	132	54300	364	1.15385	1.41085	6388.24	329.412	4.876	0.087	0.0805	0.0011	2.278	0.049	0.2043	0.0037	0.73248	1202	15	15	1200	20	34	1206	28	28	99.8336	99.5025
FC_1_10	7423_TRA_Data 238ReCal 07um April12 data	26.111	132	51400	354	1.08475	1.41036	20560	1280	5.045	0.093	0.0872	0.0017	2.432	0.063	0.1987	0.0037	0.66281	1255	19	19	1167	20	33	1356	38	38	92.988	86.0619
FishCan_1	7424_TRA_Data 238ReCal 07um April12 data	26.121	132	3270	1001	0.618382	125.754	71.8681	2.85714	232.7	6.4	0.0469	0.004	0.0286	0.0023	0.0043	0.00012	0.085684	28.6	2.2	2.2	27.66	0.76	1	70	160	160	96.7133	39.5143
FishCan_2	7424_TRA_Data 238ReCal 07um April12 data	26.127	131	778	236.1	0.978399	75.4313	24.6984	1.01587	238	11	0.048	0.011	0.0265	0.0055	0.00433	0.00019	0.12393	26.7	5.6	5.6	27.8	1.2	1.4	NAN	350	350	104.12	NAN
FishCan_3	7424_TRA_Data 238ReCal 07um April12 data	26.118	132	839	251.2	1.18869	73.2362	1678	86	239	12	0.042	0.0095	0.0246	0.0053	0.00432	0.0002	0.096591	24.8	5.1	5.1	27.8	1.3	1.5	NAN	340	340	112.097	NAN
FishCan_4	7424_TRA_Data 238ReCal 07um April12 data	26.113	132	794	238	1.17227	66.1111	529.333	28.6667	240	13	0.04	0.01	0.0223	0.006	0.00437	0.00023	0.025987	21.8	6	6	28.1	1.5	1.6	NAN	370	370	128.899	NAN
FishCan_5	7424_TRA_Data 238ReCal 07um April12 data	26.127	131	2541	761	0.69251	121.955	95.8868	3.20755	233.3	6	0.0429	0.0045	0.0258	0.0026	0.00428	0.00011	0.015188	25.8	2.6	2.6	27.53	0.69	0.96	NAN	190	190	106.705	NAN	3	27.677	0.31858	0.92538	-2.8127
FishCan_6	7424_TRA_Data 238ReCal 07um April12 data	26.108	131	2789	852	0.678404	85.8006	206.593	6.59259	236.8	6.3	0.0723	0.0051	0.0428	0.0028	0.00424	0.00011	0.060025	42.4	2.7	2.7	27.26	0.73	0.99	950	150	150	64.2925	2.86947
FishCan_7	7424_TRA_Data 238ReCal 07um April12 data	26.12	132	3091	1014	0.738659	116.018	2060.67	61.3333	249.4	6.7	0.0487	0.0043	0.0269	0.0021	0.00402	0.00011	0.17835	26.8	2.1	2.1	25.87	0.69	0.94	90	170	170	96.5299	28.7444
FishCan_8	7424_TRA_Data 238ReCal 07um April12 data	26.106	132	1794	534	0.602996	104.094	398.667	14.4444	234.8	7.4	0.0593	0.0068	0.034	0.0038	0.00425	0.00013	0.01184	34.1	3.7	3.7	27.32	0.83	1.1	370	230	230	80.1173	7.38378
FishCan_9	7424_TRA_Data 238ReCal 07um April12 data	26.116	131	3190	974	0.740246	116.507	425.333	14.6667	239	7.4	0.0496	0.0038	0.0289	0.0022	0.00425	0.00013	0.094045	28.8	2.1	2.1	27.33	0.82	1.1	110	150	150	94.8958	24.8455
FishCan_10	7424_TRA_Data 238ReCal 07um April12 data	26.128	132	2794	851	0.686251	104.289	136.293	4.14634	232.4	6	0.0486	0.0045	0.0292	0.0026	0.00434	0.00011	0.010459	30.1	2.6	2.6	27.9	0.68	0.96	100	170	170	92.691	27.9
Plesovice_1	7424_TRA_Data 238ReCal 07um April12 data	26.113	131	48200	1187	0.134794	46.7323	1967.35	61.2245	18.65	0.19	0.05329	0.00093	0.3929	0.0068	0.05356	0.00056	0.28898	336.1	5	5	336.3	3.5	8.7	331	39	39	100.06	101.601
Plesovice_2	7424_TRA_Data 238ReCal 07um April12 data	26.114	131	48500	1187	0.13235	48.0567	2771.43	91.4286	18.72	0.22	0.05344	0.00098	0.3926	0.0071	0.05346	0.00062	0.44413	337	5.4	5.4	335.7	3.8	8.8	340	40	40	99.6142	98.7353
Plesovice_3	7424_TRA_Data 238ReCal 07um April12 data	26.114	132	44700	1106	0.126854	50.0452	3576	152	18.71	0.21	0.0538	0.0011	0.3971	0.0073	0.05353	0.00061	0.23386	339.6	5.3	5.3	336.1	3.7	8.8	357	45	45	98.9694	94.1457
Plesovice_4	7424_TRA_Data 238ReCal 07um April12 data	26.112	132	50500	1322	0.194402	28.9278	11222.2	400	19.53	0.27	0.0599	0.0012	0.4187	0.0077	0.05123	0.00071	0.43361	354.6	5.5	5.5	322	4.3	8.8	591	42	42	90.8065	54.4839
Plesovice_5	7424_TRA_Data 238ReCal 07um April12 data	26.117	132	62500	1520	0.130921	48.4076	3048.78	214.634	18.43	0.26	0.05238	0.00078	0.3921	0.0071	0.05439	0.00077	0.44562	336.1	5.2	5.2	341.4	4.7	9.4	291	34	34	101.577	117.32
Plesovice_6	7424_TRA_Data 238ReCal 07um April12 data	26.128	131	75000	1830	0.122404	50	13636.4	509.091	18.5	0.23	0.053	0.00082	0.3964	0.0064	0.05403	0.00067	0.47226	338.7	4.7	4.7	339.2	4.1	9	320	36	36	100.148	106	2	336.62	1.187	2.6245	-0.142391
Plesovice_7	7424_TRA_Data 238ReCal 07um April12 data	26.132	132	66700	1683	0.121331	49.3548	1688.61	53.1646	19	0.18	0.0535	0.00085	0.3918	0.006	0.05262	0.0005	0.23812	335.8	4.3	4.3	330.6	3.1	8.4	344	37	37	98.4515	96.1047
Plesovice_8	7424_TRA_Data 238ReCal 07um April12 data	26.116	132	55200	1380	0.115072	54.3307	5257.14	171.429	19.17	0.2	0.05424	0.00094	0.3991	0.0059	0.05222	0.00054	0.28226	341.2	4.2	4.2	328.1	3.3	8.5	378	38	38	96.1606	86.7989
Plesovice_9	7424_TRA_Data 238ReCal 07um April12 data	26.109	131	72700	1830	0.129508	45.4094	2307.94	168.254	18.48	0.19	0.05348	0.00081	0.4033	0.0062	0.0541	0.00059	0.38006	343.8	4.5	4.5	339.6	3.6	8.8	341	35	35	98.7784	99.5894
Plesovice_10	7424_TRA_Data 238ReCal 07um April12 data	26.128	132	70100	1687	0.127445	48.477	6095.65	200	18.74	0.2	0.05345	0.00073	0.395	0.006	0.05327	0.00057	0.46528	337.7	4.4	4.4	334.5	3.5	8.7	338	31	31	99.0524	98.9645
R33_1	7423_TRA_Data 238ReCal 07um April12 data	26.124	132	13040	260	0.826923	5.92255	321.975	11.1111	15.74	0.38	0.0588	0.0019	0.513	0.019	0.0637	0.0015	0.52652	424	13	13	398	9.1	13	533	72	72	93.8679	74.6717
R33_2	7423_TRA_Data 238ReCal 07um April12 data	26.114	132	10220	191.3	0.505489	9.33171	1202.35	32.9412	14.78	0.37	0.0555	0.0018	0.515	0.019	0.0677	0.0016	0.45685	421	13	13	422	10	14	432	73	73	100.238	97.6852
R33_3	7423_TRA_Data 238ReCal 07um April12 data	26.13	132	5770	120	0.441667	11.0092	162.535	11.831	15.88	0.66	0.0542	0.0029	0.484	0.031	0.0648	0.0025	0.4877	401	21	21	404	15	18	360	110	110	100.748	112.222
R33_4	7423_TRA_Data 238ReCal 07um April12 data	26.112	132	20840	403	0.612903	8.14141	41680	1540	15.22	0.28	0.0547	0.0014	0.498	0.014	0.066	0.0012	0.43443	412.4	9.3	9.3	412.1	7.3	12	390	56	56	99.9273	105.667
R33_5	7423_TRA_Data 238ReCal 07um April12 data	26.109	131	23020	445	0.862921	5.41363	9208	332	14.74	0.26	0.0563	0.0016	0.525	0.014	0.0683	0.0012	0.43634	427.8	9.4	9.4	425.5	7.5	13	427	62	62	99.4624	99.6487	1	420.66	3.0094	1.8484	0.32435
R33_6	7423_TRA_Data 238ReCal 07um April12 data	26.117	132	8030	155.3	0.593046	8.82386	1784.44	73.3333	15.16	0.36	0.0557	0.0026	0.502	0.025	0.0667	0.0016	0.38135	414	17	17	415.9	9.8	14	412	98	98	100.459	100.947
R33_7	7424_TRA_Data 238ReCal 07um April12 data	26.126	131	14180	270	0.911111	5.42169	436.308	16.6154	14.57	0.29	0.0555	0.0019	0.519	0.018	0.0687	0.0013	0.56582	422	12	12	428.2	8.1	13	418	70	70	101.469	102.44
R33_8	7424_TRA_Data 238ReCal 07um April12 data	26.117	132	14550	268	0.80597	6.14679	29100	960	14.28	0.27	0.0569	0.0019	0.542	0.019	0.0703	0.0014	0.43958	437	13	13	438	8.2	13	464	74	74	100.229	94.3966
R33_9	7424_TRA_Data 238ReCal 07um April12 data	26.108	131	10600	199.8	0.564064	8.4661	731.034	21.3793	14.7	0.34	0.053	0.0021	0.507	0.02	0.0686	0.0015	0.32406	415	13	13	427.6	9.3	14	315	87	87	103.036	135.746
R33_10	7424_TRA_Data 238ReCal 07um April12 data	26.123	132	12600	247	0.789474	6.22166	318.987	12.6582	14.69	0.35	0.0545	0.002	0.506	0.018	0.0684	0.0017	0.30166	418	12	12	426	10	14	384	81	81	101.914	110.938
Temora2_1	7423_TRA_Data 238ReCal 07um April12 data	26.116	131	10630	212	0.618396	8	607.429	28.5714	15.02	0.39	0.0563	0.0019	0.518	0.022	0.0666	0.0017	0.57906	424	14	14	417	10	14	435	74	74	98.3491	95.8621
Temora2_2	7423_TRA_Data 238ReCal 07um April12 data	26.129	132	15500	308	0.409091	12.2709	1240	88	14.77	0.29	0.0542	0.0017	0.503	0.018	0.0676	0.0013	0.35758	415	12	12	421.4	7.9	13	372	67	67	101.542	113.28
Temora2_3	7423_TRA_Data 238ReCal 07um April12 data	26.112	132	11410	216	0.632407	8.18182	736.129	32.9032	14.59	0.35	0.0541	0.0018	0.501	0.017	0.0681	0.0016	0.31999	415	12	12	424.6	9.9	14	361	70	70	102.313	117.618
Temora2_4	7423_TRA_Data 238ReCal 07um April12 data	26.114	131	11860	221	0.656109	8.30827	1031.3	53.0435	14.51	0.32	0.0533	0.002	0.509	0.02	0.0689	0.0016	0.36362	415	13	13	429.1	9.5	14	328	83	83	103.398	130.823
Temora2_5	7423_TRA_Data 238ReCal 07um April12 data	26.124	132	11010	212	0.566038	8.76033	22020	1540	14.63	0.32	0.0559	0.0022	0.518	0.02	0.0688	0.0016	0.33995	423	13	13	428.5	9.7	14	408	82	82	101.3	105.025	0	417.67	2.712	2.0874	0.213542
Temora2_6	7423_TRA_Data 238ReCal 07um April12 data	26.124	132	10660	197	0.541624	8.71681	1938.18	105.455	14.74	0.33	0.0566	0.0022	0.518	0.021	0.0672	0.0015	0.36994	425	14	14	419.2	9.1	13	459	87	87	98.6353	91.329
Temora2_7	7423_TRA_Data 238ReCal 07um April12 data	26.112	131	10510	198	0.44697	10.3125	600.571	33.7143	15.06	0.34	0.0552	0.0022	0.508	0.023	0.0666	0.0015	0.18094	414	15	15	415.3	9.1	13	361	87	87	100.314	115.042
Temora2_8	7423_TRA_Data 238ReCal 07um April12 data	26.131	132	14200	276	0.435145	11.5966	811.429	48	15.25	0.31	0.0557	0.0016	0.496	0.017	0.0654	0.0013	0.5043	410	12	12	408	8	13	441	65	65	99.5122	92.517
Temora2_9	7423_TRA_Data 238ReCal 07um April12 data	26.121	131	15030	280	0.446429	11.1111	509.492	32.2034	15.21	0.33	0.0549	0.0015	0.491	0.017	0.066	0.0015	0.47698	405	12	12	411.7	9.3	13	385	60	60	101.654	106.935
Temora2_10	7423_TRA_Data 238ReCal 07um April12 data	26.123	132	8910	168	0.549405	8.35821	434.634	20	15.36	0.35	0.0584	0.0021	0.525	0.021	0.0657	0.0015	0.35391	430	14	14	410.1	9	13	526	79	79	95.3721	77.9658
Z_91500_1	7423_TRA_Data 238ReCal 07um April12 data	23.518	118	11830	79.5	0.389937	5.16234	639.459	22.7027	5.56	0.15	0.0748	0.0023	1.861	0.072	0.18	0.0052	0.65262	1060	26	26	1065	29	37	1076	64	64	100.472	98.9777
Z_91500_2	7423_TRA_Data 238ReCal 07um April12 data	26.123	131	11390	81.8	0.371638	5.21019	312.055	11.2329	5.69	0.13	0.0749	0.0022	1.823	0.063	0.1765	0.0039	0.53217	1053	23	23	1047	22	32	1090	60	60	99.4302	96.055
Z_91500_3	7423_TRA_Data 238ReCal 07um April12 data	26.118	132	11300	78.8	0.384518	4.98734	1076.19	36.1905	5.43	0.16	0.0748	0.0028	1.858	0.075	0.1835	0.0052	0.54252	1064	27	27	1084	28	37	1072	76	76	101.88	101.119
Z_91500_4	7423_TRA_Data 238ReCal 07um April12 data	26.113	132	11190	78.9	0.372624	5.44138	324.348	11.3043	5.56	0.17	0.0762	0.0021	1.908	0.071	0.1811	0.0056	0.65571	1074	25	25	1077	30	39	1096	56	56	100.279	98.2664
Z_91500_5	7423_TRA_Data 238ReCal 07um April12 data	26.117	131	11090	80.6	0.366005	6.06015	1167.37	40	5.72	0.18	0.0733	0.0021	1.811	0.067	0.1765	0.0058	0.65836	1045	24	24	1046	32	39	1018	59	59	100.096	102.75
Z_91500_6	7423_TRA_Data 238ReCal 07um April12 data	26.111	132	10650	79.6	0.34799	5.56643	308.696	10.1449	5.6	0.15	0.0753	0.0022	1.86	0.069	0.1793	0.0053	0.68625	1063	25	25	1061	29	37	1078	59	59	99.8119	98.423
Z_91500_7	7423_TRA_Data 238ReCal 07um April12 data	26.116	132	11030	80.3	0.367372	5.42568	630.286	20.5714	5.66	0.18	0.0748	0.0029	1.835	0.088	0.1788	0.0057	0.50341	1049	30	30	1062	31	39	1017	77	77	101.239	104.425	1	1064.7	6.1064	0.60237	0.216491
Z_91500_8	7423_TRA_Data 238ReCal 07um April12 data	26.11	132	11950	82	0.434146	4.65116	468.627	13.3333	5.54	0.17	0.075	0.0025	1.856	0.072	0.1798	0.005	0.6108	1061	26	26	1064	27	36	1058	67	67	100.283	100.567
Z_91500_9	7423_TRA_Data 238ReCal 07um April12 data	26.121	132	10860	77.9	0.369705	5.77037	587.027	20.5405	5.64	0.17	0.0751	0.0023	1.845	0.073	0.1787	0.0053	0.62539	1057	27	27	1058	29	38	1060	60	60	100.095	99.8113
Z_91500_10	7424_TRA_Data 238ReCal 07um April12 data	26.127	132	10980	79.3	0.366961	5.08333	593.514	20.5405	5.67	0.18	0.0741	0.0025	1.861	0.074	0.1789	0.0057	0.60683	1062	26	26	1059	31	39	1048	70	70	99.7175	101.05
Z_91500_11	7424_TRA_Data 238ReCal 07um April12 data	26.114	131	11140	80.7	0.369269	5.38	1172.63	43.1579	5.57	0.19	0.0755	0.0021	1.839	0.073	0.1794	0.0061	0.72688	1054	26	26	1068	32	40	1074	57	57	101.328	99.4413
Z_91500_12	7424_TRA_Data 238ReCal 07um April12 data	26.115	132	10890	79.3	0.361917	5.05096	290.4	9.6	5.59	0.17	0.0734	0.0022	1.837	0.074	0.1806	0.0056	0.6566	1057	27	27	1068	30	39	1010	61	61	101.041	105.743
Z_91500_13	7424_TRA_Data 238ReCal 07um April12 data	26.215	132	10960	80.8	0.357673	5.35099	21920	760	5.67	0.16	0.0761	0.0022	1.861	0.066	0.1778	0.005	0.68953	1059	23	23	1056	27	36	1102	58	58	99.7167	95.8258
Z_91500_14	7424_TRA_Data 238ReCal 07um April12 data	26.118	132	11170	78.2	0.387468	5.24832	3191.43	114.286	5.56	0.18	0.0751	0.0022	1.853	0.066	0.1816	0.0061	0.69813	1067	23	23	1073	33	41	1053	59	59	100.562	101.899
Z_91500_15	7424_TRA_Data 238ReCal 07um April12 data	24.078	121	11280	81.6	0.384804	5.8705	271.807	9.15663	5.71	0.19	0.0745	0.0025	1.844	0.09	0.1769	0.0063	0.73901	1059	32	32	1048	34	41	1032	69	69	98.9613	101.55
1 concentration uncertainty c.20%
2&3 data not corrected for common-Pb
4 Concordence calculated as (206Pb-238U age/207Pb-235U age)*100
5 Concordance calculated as (206Pb-238U age/207Pb-206Pb age)*100
Decay constants of Jaffey et al. (1971) Precision measurement of half-lives and specific activities of 235U and 238U. Physical Reviews, C 4: 1889-1906.
Uncertainties quoted are Iolite output of 2SE that is expressed at 2 sigma level for internal errors only and 2SE sys represent propagated systematic error (Internal error + Calculated Excess uncertainity) (Paton et al.(2010) Improved laser ablation U-Pb zircon geochronology through robust downhole fractionation correction: G3, 11, doi: 10.1029/2009GC002618.)

## Sheet: 07um15s FMT A4
Supplementary Data Table A4: U-Pb data for 7 µm spots, 15 sec integration interval
12/04/2018 Mineral Isotope Laser Laboratory (MILL), Texas Tech University										Data for Tera-Wasserburg plot2				Data for Wetherill plot3					Dates (Ma)3									207-235	207-206			Concordia Age (Ma)		%Age Offset
Identifier	Comments	Duration (s)	#points	206Pb cps	U ppm1	Th/U1	U/Pb1	206Pb/204Pb	2SE	238U/206Pb	2SE	207Pb/206Pb	2SE	207Pb/235U	2SE	206Pb/238U	2SE	Rho	207Pb/235U	2s	2ssys	206Pb/238U	2s	2ssys	207Pb/206Pb	2s	2ssys	% Conc4	% Conc5	Rejects	Age	+2SE	MSWD
FC_1_1	7423_TRA_Data 238ReCal 07um April12 data	13.113	66	102700	592	1.39865	1.32084	2307.87	53.9326	5.076	0.073	0.0755	0.0014	2.033	0.034	0.1972	0.0027	0.44037	1126	11	38	1160	15	15	1078	36	59	103.02	107.607
FC_1_2	7423_TRA_Data 238ReCal 07um April12 data	13.114	66	88900	523	0.774379	2.38377	5080	131.429	5.097	0.092	0.0774	0.0013	2.107	0.043	0.1967	0.0036	0.66157	1150	14	39	1157	19	19	1130	33	58	100.609	102.389
FC_1_3	7423_TRA_Data 238ReCal 07um April12 data	13.155	67	89500	652	1.94018	0.961652	220400	6400	5.024	0.075	0.0763	0.0012	2.089	0.039	0.1988	0.003	0.58415	1148	12	37	1171	16	16	1105	33	58	102.003	105.973
FC_1_4	7423_TRA_Data 238ReCal 07um April12 data	13.118	66	129200	775	1.93935	0.938257	36914.3	828.571	5.13	0.072	0.0759	0.0011	2.058	0.032	0.1955	0.0027	0.57521	1134	11	38	1151	15	15	1088	28	56	101.499	105.79
FC_1_5	7423_TRA_Data 238ReCal 07um April12 data	13.111	67	52200	300	0.7	1.875	640.491	15.9509	4.95	0.12	0.0943	0.0033	2.64	0.11	0.2027	0.0051	0.43101	1309	31	50	1193	27	27	1499	70	84	91.1383	79.5864	3	1144.2	4.7894	4.2407	4.11283
FC_1_6	7423_TRA_Data 238ReCal 07um April12 data	13.124	66	102700	621	1.38003	1.38	22822.2	600	5.09	0.091	0.076	0.0012	2.099	0.044	0.1959	0.0034	0.65601	1147	14	40	1153	18	18	1088	31	57	100.523	105.974
FC_1_7	7423_TRA_Data 238ReCal 07um April12 data	13.13	66	75500	459	0.858388	2.18571	2849.06	71.6981	5.2	0.11	0.0771	0.0013	2.057	0.047	0.1924	0.0039	0.63101	1135	15	39	1134	21	21	1117	34	58	99.9119	101.522
FC_1_8	7423_TRA_Data 238ReCal 07um April12 data	13.129	66	77300	464	1.3944	1.32951	14054.5	600	5.068	0.09	0.0777	0.0013	2.129	0.044	0.1967	0.0037	0.68245	1157	14	39	1163	20	20	1132	33	58	100.519	102.739
FC_1_9	7423_TRA_Data 238ReCal 07um April12 data	13.197	66	68000	408	1.42157	1.279	3675.68	75.6757	5.074	0.082	0.0805	0.0014	2.19	0.05	0.1963	0.0035	0.68269	1176	16	41	1155	19	19	1203	34	58	98.2143	96.01
FC_1_10	7423_TRA_Data 238ReCal 07um April12 data	13.111	66	68000	398	1.27136	1.25157	1863.01	101.37	5.028	0.092	0.0911	0.0024	2.547	0.086	0.1994	0.0038	0.56599	1284	24	45	1172	20	20	1442	52	70	91.2773	81.276
FishCan_1	7424_TRA_Data 238ReCal 07um April12 data	13.121	66	3860	1020	0.618627	120	67.1304	2.43478	237.3	7	0.0493	0.0053	0.0286	0.003	0.00419	0.00012	0.11579	28.6	3	3.4	26.92	0.77	0.77	190	210	210	94.1259	14.1684
FishCan_2	7424_TRA_Data 238ReCal 07um April12 data	13.127	66	865	222.8	1.05027	77.3611	91.0526	4.52632	234	14	0.045	0.014	0.0247	0.0071	0.00446	0.00026	0.075302	24.4	7	7.2	28.7	1.7	1.7	NAN	480	490	117.623	NAN
FishCan_3	7424_TRA_Data 238ReCal 07um April12 data	13.118	67	910	229.7	1.16282	59.5078	55.1515	3.39394	238	15	0.04	0.013	0.0214	0.0067	0.00433	0.00028	0.26809	22.1	6.9	7	27.8	1.8	1.8	NAN	490	490	125.792	NAN
FishCan_4	7424_TRA_Data 238ReCal 07um April12 data	13.113	66	895	233.4	1.18937	70.7273	61.7241	4.55172	240	17	0.047	0.015	0.0247	0.008	0.00432	0.00033	0.14802	24.3	7.9	8	27.8	2.1	2.1	NAN	510	510	114.403	NAN	1	27.606	0.34647	1.6418	-3.06201
FishCan_5	7424_TRA_Data 238ReCal 07um April12 data	13.127	66	2860	749	0.706275	126.734	65.7471	2.29885	236.6	7.1	0.0397	0.0067	0.0233	0.0038	0.00422	0.00013	0.053228	23.3	3.8	4	27.15	0.84	0.84	NAN	280	290	116.524	NAN
FishCan_6	7424_TRA_Data 238ReCal 07um April12 data	13.108	66	3200	808	0.707921	90.7865	914.286	31.4286	224.4	7.7	0.07	0.0061	0.0422	0.0034	0.00452	0.00015	0.056606	41.9	3.3	3.9	29.05	0.97	0.97	880	180	190	69.3317	3.30114
FishCan_7	7424_TRA_Data 238ReCal 07um April12 data	13.12	67	3160	875	0.712	123.239	574.545	23.6364	240	10	0.0465	0.0058	0.0265	0.0028	0.00423	0.00018	0.18018	26.5	2.8	3.1	27.2	1.1	1.1	40	230	240	102.642	68
FishCan_8	7424_TRA_Data 238ReCal 07um April12 data	13.106	66	1835	486	0.54321	153.797	118.387	5.74194	227	10	0.0482	0.0082	0.0286	0.0045	0.00439	0.00018	0.030495	28.5	4.4	4.7	28.2	1.2	1.2	NAN	300	300	98.9474	NAN
FishCan_9	7424_TRA_Data 238ReCal 07um April12 data	13.116	66	3530	910	0.716484	116.22	784.444	28.8889	222.7	8	0.0466	0.0052	0.0271	0.0029	0.00449	0.00016	0.081312	27.6	2.9	3.3	28.9	1	1	NAN	210	210	104.71	NAN
FishCan_10	7424_TRA_Data 238ReCal 07um April12 data	13.128	66	3060	804	0.700249	111.822	72	2.58824	228.7	7.7	0.0478	0.0053	0.0287	0.0032	0.00441	0.00015	0.091058	28.7	3.1	3.5	28.34	0.95	0.95	40	200	210	98.7456	70.85
Plesovice_1	7424_TRA_Data 238ReCal 07um April12 data	13.113	66	55900	1124	0.144662	43.9062	2378.72	51.0638	18.2	0.22	0.054	0.0011	0.4047	0.0086	0.05508	0.00068	0.31386	344.8	6.2	17	345.6	4.2	4.2	366	46	68	100.232	94.4262
Plesovice_2	7424_TRA_Data 238ReCal 07um April12 data	13.114	66	56600	1134	0.144709	42.6316	1689.55	41.791	18.34	0.29	0.0528	0.0013	0.3958	0.0095	0.05422	0.00086	0.27129	338.3	6.9	17	340.3	5.2	5.2	313	58	80	100.591	108.722
Plesovice_3	7424_TRA_Data 238ReCal 07um April12 data	13.114	66	55600	1078	0.146197	42.2745	3005.41	113.514	18.45	0.28	0.0547	0.0015	0.41	0.012	0.05428	0.00084	0.35319	348.6	8.3	18	340.7	5.2	5.2	398	61	81	97.7338	85.603
Plesovice_4	7424_TRA_Data 238ReCal 07um April12 data	13.112	66	59100	1284	0.23676	26.8058	10745.5	309.091	20.04	0.3	0.062	0.0015	0.427	0.01	0.04975	0.00078	0.35751	360.8	7.3	18	313	4.8	4.8	667	52	74	86.7517	46.9265
Plesovice_5	7424_TRA_Data 238ReCal 07um April12 data	13.117	66	86000	1670	0.139521	43.9474	1932.58	119.101	18.19	0.28	0.05301	0.00079	0.4077	0.007	0.0549	0.00078	0.5285	347.9	4.9	16	344.5	4.8	4.8	333	35	67	99.0227	103.453	2	340.61	1.456	3.8246	1.04123
Plesovice_6	7424_TRA_Data 238ReCal 07um April12 data	13.128	66	86500	1691	0.131934	46.0763	24714.3	514.286	18.58	0.29	0.05335	0.00097	0.4029	0.0079	0.0539	0.00086	0.48884	344.4	5.9	17	338.4	5.2	5.2	347	43	72	98.2578	97.5216
Plesovice_7	7424_TRA_Data 238ReCal 07um April12 data	13.132	67	78100	1562	0.13233	47.3333	6248	176	18.94	0.23	0.0534	0.0011	0.3938	0.0082	0.05293	0.00065	0.31413	336.9	6	16	332.5	4	4	334	47	71	98.694	99.5509
Plesovice_8	7424_TRA_Data 238ReCal 07um April12 data	13.116	66	64200	1267	0.124388	51.0887	4755.56	133.333	18.97	0.27	0.0551	0.0013	0.4096	0.0068	0.05279	0.00078	0.10411	349.1	5	17	331.6	4.8	4.8	402	52	75	94.9871	82.4876
Plesovice_9	7424_TRA_Data 238ReCal 07um April12 data	13.109	66	100700	2000	0.1365	42.2833	18309.1	781.818	18.62	0.21	0.05417	0.00091	0.4077	0.0068	0.05381	0.00061	0.29625	347	4.9	17	337.9	3.7	3.7	387	38	67	97.3775	87.3127
Plesovice_10	7424_TRA_Data 238ReCal 07um April12 data	13.128	66	83800	1696	0.128184	47.7746	3565.96	127.66	18.67	0.26	0.05355	0.00089	0.4006	0.0075	0.05363	0.00074	0.5017	342.6	5.3	16	336.7	4.6	4.6	344	38	66	98.2779	97.8779
R33_1	7423_TRA_Data 238ReCal 07um April12 data	13.124	66	15590	266	0.809398	5.96413	451.884	14.4928	15.55	0.45	0.0589	0.0026	0.53	0.024	0.0643	0.0019	0.48487	433	16	24	402	12	12	556	97	110	92.8406	72.3022
R33_2	7423_TRA_Data 238ReCal 07um April12 data	13.114	66	11520	187.2	0.491987	9.6	698.182	20	14.77	0.45	0.0576	0.0023	0.54	0.023	0.0679	0.002	0.40386	437	15	25	423	12	12	516	94	110	96.7963	81.9767
R33_3	7423_TRA_Data 238ReCal 07um April12 data	13.13	66	7640	128.4	0.462617	9.95349	268.07	9.82456	15.46	0.54	0.0564	0.0034	0.514	0.035	0.0642	0.0021	0.43752	421	24	30	401	13	13	440	130	140	95.2494	91.1364
R33_4	7423_TRA_Data 238ReCal 07um April12 data	13.112	66	24400	420	0.661905	7.73481	2121.74	67.8261	15.66	0.36	0.0548	0.0016	0.493	0.017	0.0644	0.0014	0.43955	407	11	21	402.1	8.8	8.8	415	61	79	98.7961	96.8916
R33_5	7423_TRA_Data 238ReCal 07um April12 data	13.109	66	27580	466	0.841202	5.50177	1081.57	38.0392	15.19	0.28	0.0566	0.0023	0.52	0.018	0.0662	0.0012	0.19802	425	12	23	413.2	7.5	7.5	441	87	100	97.2235	93.6961
R33_6	7423_TRA_Data 238ReCal 07um April12 data	13.117	67	9620	162.9	0.590546	9.30857	1131.76	38.8235	15.41	0.5	0.0577	0.0031	0.513	0.026	0.0654	0.002	0.18915	418	18	25	408	12	12	510	120	130	97.6077	80	0	413.98	3.0703	3.4606	-1.26878
R33_7	7424_TRA_Data 238ReCal 07um April12 data	13.126	66	16940	276	0.906522	5.56452	2606.15	78.4615	14.82	0.34	0.0559	0.0024	0.511	0.023	0.0672	0.0016	0.38121	424	15	23	418.9	9.6	9.6	439	93	110	98.7972	95.4214
R33_8	7424_TRA_Data 238ReCal 07um April12 data	13.117	66	17090	272	0.785662	6.15385	402.118	11.7647	14.67	0.35	0.0566	0.0026	0.535	0.027	0.0686	0.0017	0.31292	437	18	26	428	10	10	449	96	110	97.9405	95.3229
R33_9	7424_TRA_Data 238ReCal 07um April12 data	13.108	66	12100	195.7	0.577414	8.22269	396.721	10.4918	14.99	0.47	0.0523	0.003	0.485	0.027	0.0674	0.0021	0.3636	399	18	25	420	13	13	280	120	130	105.263	150
R33_10	7424_TRA_Data 238ReCal 07um April12 data	13.123	66	15050	255.6	0.8482	5.95804	1433.33	37.1429	15.49	0.42	0.0546	0.0023	0.499	0.022	0.0647	0.0017	0.35672	409	15	23	404	10	10	383	92	110	98.7775	105.483
Temora2_1	7423_TRA_Data 238ReCal 07um April12 data	13.116	66	12930	221.2	0.626582	8.31579	1034.4	36	15.39	0.44	0.0567	0.0024	0.525	0.025	0.0652	0.0018	0.45663	426	17	25	407	11	11	440	94	110	95.5399	92.5
Temora2_2	7423_TRA_Data 238ReCal 07um April12 data	13.129	66	21600	367	0.399183	12.1122	1728	96	15.51	0.36	0.0567	0.0019	0.515	0.023	0.065	0.0015	0.52647	424	15	23	406	9.2	9.2	473	78	96	95.7547	85.8351
Temora2_3	7423_TRA_Data 238ReCal 07um April12 data	13.112	67	13890	233	0.633476	8.62963	292.421	8.84211	15.33	0.46	0.0558	0.0024	0.509	0.021	0.0653	0.002	0.32676	419	13	22	408	12	12	423	96	110	97.3747	96.4539
Temora2_4	7423_TRA_Data 238ReCal 07um April12 data	13.114	66	15060	243	0.661728	7.66562	237.165	8.97638	14.77	0.39	0.054	0.0028	0.511	0.027	0.0676	0.0017	0.21387	416	18	26	422	10	10	340	120	130	101.442	124.118
Temora2_5	7423_TRA_Data 238ReCal 07um April12 data	13.124	66	15800	257	0.614786	8.10726	734.884	46.5116	14.74	0.4	0.0559	0.0022	0.526	0.02	0.0673	0.0019	0.42187	428	13	23	420	11	11	440	87	100	98.1308	95.4545
Temora2_6	7423_TRA_Data 238ReCal 07um April12 data	13.124	67	14490	229	0.576419	8.54478	1073.33	61.4815	14.98	0.33	0.0574	0.0024	0.535	0.023	0.0673	0.0015	0.40787	434	15	24	419.8	9.2	9.2	480	96	110	96.7281	87.4583	0	412.38	3.1412	2.9328	-1.05571
Temora2_7	7423_TRA_Data 238ReCal 07um April12 data	13.112	66	13850	227	0.43348	11.0194	439.683	20.6349	15.2	0.37	0.0548	0.0026	0.507	0.025	0.0664	0.0016	0.31225	414	17	25	414.4	9.7	9.7	390	110	120	100.097	106.256
Temora2_8	7423_TRA_Data 238ReCal 07um April12 data	13.131	66	18690	311	0.41865	11.8251	655.789	30.5263	15.63	0.36	0.055	0.0017	0.501	0.022	0.064	0.0015	0.63957	411	15	23	399.8	9	9	420	73	91	97.2749	95.1905
Temora2_9	7423_TRA_Data 238ReCal 07um April12 data	13.121	66	19970	323	0.428173	11.3732	353.451	17.5221	15.33	0.42	0.0553	0.002	0.505	0.024	0.0655	0.0017	0.54682	413	16	24	409	11	11	394	80	96	99.0315	103.807
Temora2_10	7423_TRA_Data 238ReCal 07um April12 data	13.123	66	10920	183.4	0.589422	7.67364	183.529	6.55462	15.77	0.51	0.0568	0.0029	0.504	0.026	0.0639	0.0021	0.41971	412	17	25	399	13	13	470	110	120	96.8447	84.8936
Z_91500_1	7423_TRA_Data 238ReCal 07um April12 data	13.11	66	13390	78.7	0.382465	5.04487	653.171	20	5.61	0.2	0.075	0.0031	1.889	0.094	0.1799	0.0065	0.48755	1078	34	49	1065	35	35	1094	90	100	98.7941	97.3492
Z_91500_2	7423_TRA_Data 238ReCal 07um April12 data	13.123	66	13300	80.9	0.3733	5.5034	298.876	8.76404	5.6	0.15	0.0739	0.0031	1.817	0.074	0.179	0.005	0.34896	1050	28	46	1060	27	27	1042	78	90	100.952	101.727
Z_91500_3	7423_TRA_Data 238ReCal 07um April12 data	13.118	66	13210	81.9	0.366178	5.35294	562.128	12.766	5.63	0.2	0.0733	0.0034	1.81	0.1	0.176	0.0063	0.56908	1050	37	51	1044	34	34	1008	89	100	99.4286	103.571
Z_91500_4	7423_TRA_Data 238ReCal 07um April12 data	13.113	66	13110	77.8	0.384319	5.01935	514.118	13.7255	5.44	0.2	0.0777	0.0028	1.97	0.1	0.186	0.0072	0.67584	1107	34	49	1098	39	39	1136	70	84	99.187	96.6549
Z_91500_5	7423_TRA_Data 238ReCal 07um April12 data	13.117	66	13120	81	0.371481	6	709.189	20	5.67	0.25	0.0736	0.0025	1.782	0.08	0.1758	0.0075	0.63653	1045	31	48	1042	41	41	1029	68	84	99.7129	101.263
Z_91500_6	7423_TRA_Data 238ReCal 07um April12 data	13.111	66	12360	79.7	0.353827	5.61268	574.884	17.2093	5.57	0.2	0.0742	0.003	1.835	0.09	0.1795	0.0067	0.61757	1056	33	49	1063	37	37	1037	80	93	100.663	102.507
Z_91500_7	7423_TRA_Data 238ReCal 07um April12 data	13.116	66	12760	80.3	0.372478	5.38926	622.439	16.5854	5.69	0.24	0.0759	0.0037	1.92	0.12	0.1788	0.0077	0.38599	1080	40	52	1058	42	42	1075	96	110	97.963	98.4186
Z_91500_8	7423_TRA_Data 238ReCal 07um April12 data	13.11	67	13580	80.4	0.409204	4.72941	3017.78	91.1111	5.53	0.19	0.0753	0.0032	1.91	0.1	0.1792	0.0058	0.65415	1087	36	51	1062	32	32	1099	84	97	97.7001	96.6333	0	1062.2	7.8429	0.79829	-0.0188253
Z_91500_9	7423_TRA_Data 238ReCal 07um April12 data	13.121	66	12780	79.5	0.36478	5.76087	543.83	14.8936	5.66	0.19	0.0743	0.0028	1.825	0.088	0.1791	0.0063	0.51133	1052	31	46	1065	34	34	1032	79	94	101.236	103.198
Z_91500_10	7424_TRA_Data 238ReCal 07um April12 data	13.127	66	12860	79.9	0.369212	5.08917	1512.94	44.7059	5.57	0.22	0.0752	0.0035	1.844	0.097	0.1789	0.0072	0.53445	1062	36	51	1071	42	42	1052	97	110	100.847	101.806
Z_91500_11	7424_TRA_Data 238ReCal 07um April12 data	13.114	66	13170	80.2	0.377805	5.10828	271.546	9.89691	5.61	0.23	0.0765	0.0028	1.888	0.095	0.1796	0.0075	0.70757	1069	32	47	1063	41	41	1079	75	89	99.4387	98.5171
Z_91500_12	7424_TRA_Data 238ReCal 07um April12 data	13.115	66	12590	79.3	0.370744	5.11613	231.009	6.42202	5.62	0.22	0.0734	0.0032	1.794	0.094	0.1784	0.007	0.6538	1046	37	52	1057	38	38	1014	88	100	101.052	104.241
Z_91500_13	7424_TRA_Data 238ReCal 07um April12 data	13.215	66	12880	80.5	0.367702	5.26144	276.989	8.8172	5.66	0.22	0.0765	0.0033	1.845	0.087	0.1798	0.0068	0.54969	1059	31	47	1064	37	37	1127	84	96	100.472	94.4099
Z_91500_14	7424_TRA_Data 238ReCal 07um April12 data	13.118	67	13150	80.5	0.378882	5.33113	1547.06	44.7059	5.58	0.24	0.0734	0.0029	1.829	0.081	0.1793	0.0078	0.64336	1049	29	45	1061	43	43	1009	84	98	101.144	105.154
Z_91500_15	7424_TRA_Data 238ReCal 07um April12 data	13.123	66	13070	79.6	0.375879	5.8963	968.148	27.4074	5.69	0.25	0.0753	0.0031	1.91	0.11	0.179	0.008	0.76167	1084	40	54	1059	44	44	1061	86	99	97.6937	99.8115
1 concentration uncertainty c.20%
2&3 data not corrected for common-Pb
4 Concordence calculated as (206Pb-238U age/207Pb-235U age)*100
5 Concordance calculated as (206Pb-238U age/207Pb-206Pb age)*100
Decay constants of Jaffey et al. (1971) Precision measurement of half-lives and specific activities of 235U and 238U. Physical Reviews, C 4: 1889-1906.
Uncertainties quoted are Iolite output of 2SE that is expressed at 2 sigma level for internal errors only and 2SE sys represent propagated systematic error (Internal error + Calculated Excess uncertainity) (Paton et al.(2010) Improved laser ablation U-Pb zircon geochronology through robust downhole fractionation correction: G3, 11, doi: 10.1029/2009GC002618.)

## Sheet: 07um10s FMT A4
Supplementary Data Table A4: U-Pb data for 7 µm spots, 10 sec integration interval
12/04/2018 Mineral Isotope Laser Laboratory (MILL), Texas Tech University										Data for Tera-Wasserburg plot2				Data for Wetherill plot3					Dates (Ma)3									207-235	207-206			Concordia Age (Ma)		%Age Offset
Identifier	Comments	Duration (s)	#points	206Pb cps	U ppm1	Th/U1	U/Pb1	206Pb/204Pb	2SE	238U/206Pb	2SE	207Pb/206Pb	2SE	207Pb/235U	2SE	206Pb/238U	2SE	Rho	207Pb/235U	2s	2ssys	206Pb/238U	2s	2ssys	207Pb/206Pb	2s	2ssys	% Conc4	% Conc5	Rejects	Age	+2SE	MSWD
FC_1_1	7423_TRA_Data 238ReCal 07um April12 data	8.113	40	108400	588	1.35714	1.36744	1821.85	36.9748	5.159	0.082	0.075	0.0013	2.027	0.043	0.1943	0.0031	0.51798	1124	14	49	1144	17	30	1077	36	90	101.779	106.221
FC_1_2	7423_TRA_Data 238ReCal 07um April12 data	8.114	41	95200	526	0.781369	2.37579	8278.26	217.391	5.25	0.12	0.0773	0.0017	2.067	0.055	0.1891	0.0039	0.67158	1140	19	52	1120	22	34	1129	44	94	98.2456	99.2028
FC_1_3	7423_TRA_Data 238ReCal 07um April12 data	8.155	41	89500	665	1.96842	0.973646	10339.1	217.391	5.16	0.11	0.0761	0.0017	2.056	0.048	0.1937	0.0041	0.59829	1136	15	47	1141	22	34	1106	40	86	100.44	103.165
FC_1_4	7423_TRA_Data 238ReCal 07um April12 data	8.118	41	135600	768	1.98177	0.935445	5770.21	110.638	5.23	0.1	0.0763	0.0014	2.033	0.042	0.191	0.0036	0.62762	1126	14	49	1127	19	32	1097	37	91	100.089	102.735
FC_1_5	7423_TRA_Data 238ReCal 07um April12 data	8.111	41	54700	297.8	0.69409	1.69012	453.942	9.95851	5.04	0.16	0.1018	0.0031	2.84	0.13	0.198	0.0063	0.71612	1373	33	59	1170	33	41	1646	57	95	85.2149	71.0814	2	1131	5.5688	1.8143	2.91174
FC_1_6	7423_TRA_Data 238ReCal 07um April12 data	8.124	41	109300	613	1.46819	1.33261	14573.3	320	5.25	0.11	0.0756	0.0015	2.037	0.047	0.1905	0.0038	0.50284	1127	16	50	1124	21	32	1087	41	96	99.7338	103.404
FC_1_7	7423_TRA_Data 238ReCal 07um April12 data	8.13	41	80700	449	0.922049	2.09813	2043.04	35.443	5.26	0.14	0.0759	0.0015	2.008	0.061	0.1896	0.005	0.69805	1116	21	51	1119	27	37	1087	39	91	100.269	102.944
FC_1_8	7423_TRA_Data 238ReCal 07um April12 data	8.129	41	86000	488	1.47336	1.32609	3822.22	115.556	5.23	0.1	0.0763	0.0015	2.045	0.045	0.1905	0.0042	0.60338	1130	15	49	1127	22	32	1104	37	85	99.7345	102.083
FC_1_9	7423_TRA_Data 238ReCal 07um April12 data	8.197	41	70800	404	1.61139	1.22796	2400	50.8475	5.19	0.12	0.0798	0.0019	2.118	0.057	0.1919	0.0045	0.55701	1153	19	51	1131	24	35	1192	46	91	98.0919	94.8826
FC_1_10	7423_TRA_Data 238ReCal 07um April12 data	8.111	41	78500	436	1.41514	1.24928	5413.79	200	5.13	0.12	0.0862	0.0024	2.353	0.07	0.1952	0.0049	0.52971	1227	21	54	1149	26	37	1333	53	95	93.643	86.1965
FishCan_1	7424_TRA_Data 238ReCal 07um April12 data	8.121	41	4060	970	0.638144	110.227	68.2353	2.68908	233.9	7.3	0.051	0.0056	0.0307	0.0036	0.00429	0.00014	0.12826	30.6	3.5	4.1	27.59	0.88	1.1	200	230	240	90.1634	13.795
FishCan_2	7424_TRA_Data 238ReCal 07um April12 data	8.127	41	856	204.8	1.12402	94.8148	244.571	15.1429	237	17	0.05	0.017	0.0281	0.0089	0.00444	0.00033	0.09254	27.8	8.8	9	28.5	2.1	2.2	NAN	560	560	102.518	NAN
FishCan_3	7424_TRA_Data 238ReCal 07um April12 data	8.118	41	884	211.8	1.18036	74.5775	47.7838	3.62162	245	20	0.045	0.02	0.025	0.011	0.00429	0.00036	0.22204	25	10	11	28	2.2	2.3	NAN	680	680	112	NAN
FishCan_4	7424_TRA_Data 238ReCal 07um April12 data	8.113	40	888	214	1.25467	66.2539	1776	164	242	22	0.053	0.019	0.028	0.01	0.00427	0.00041	0.025401	28	10	10	27.5	2.6	2.7	140	630	630	98.2143	19.6429
FishCan_5	7424_TRA_Data 238ReCal 07um April12 data	8.127	41	2950	684	0.739766	117.123	60.8247	2.47423	230.9	7.8	0.0379	0.0079	0.0236	0.0048	0.00438	0.00015	0.087701	23.6	4.8	5	28.15	0.94	1.2	NAN	350	360	119.28	NAN	0	28.163	0.41235	0.9173	-1.10612
FishCan_6	7424_TRA_Data 238ReCal 07um April12 data	8.108	41	3330	728	0.782967	98.3784	116.842	4.5614	216.7	8.9	0.0639	0.0071	0.0415	0.0046	0.00463	0.00019	0.04839	41.2	4.5	5.3	29.8	1.2	1.4	680	250	260	72.3301	4.38235
FishCan_7	7424_TRA_Data 238ReCal 07um April12 data	8.12	41	3100	717	0.701534	128.036	248	14.4	228	12	0.0436	0.0063	0.0264	0.0036	0.00447	0.00023	0.15724	26.4	3.6	4	28.7	1.5	1.6	NAN	270	280	108.712	NAN
FishCan_8	7424_TRA_Data 238ReCal 07um April12 data	8.106	40	1920	457	0.575492	131.7	67.3684	4.21053	224	11	0.047	0.01	0.0293	0.006	0.00443	0.00021	0.080374	29.1	5.9	6.2	28.5	1.3	1.5	NAN	380	390	97.9381	NAN
FishCan_9	7424_TRA_Data 238ReCal 07um April12 data	8.116	41	3590	822	0.682482	115.288	652.727	25.4545	218.8	9.2	0.0483	0.0064	0.0312	0.0041	0.0045	0.0002	-0.0021289	31.1	4	4.5	29	1.3	1.5	90	260	270	93.2476	32.2222
FishCan_10	7424_TRA_Data 238ReCal 07um April12 data	8.128	41	3090	717	0.735007	91.9231	56.6972	2.56881	229.3	9.5	0.0431	0.0065	0.0264	0.0038	0.00443	0.00018	0.025963	26.4	3.8	4.2	28.5	1.2	1.3	NAN	260	270	107.955	NAN
Plesovice_1	7424_TRA_Data 238ReCal 07um April12 data	8.113	41	59100	1114	0.14228	45.6557	39400	1000	18.15	0.31	0.0534	0.0014	0.409	0.011	0.05524	0.00095	0.35695	348	8	22	346.6	5.8	10	334	57	110	99.5977	103.772
Plesovice_2	7424_TRA_Data 238ReCal 07um April12 data	8.114	41	59900	1138	0.143497	45.52	849.645	22.695	18.27	0.36	0.0524	0.0015	0.399	0.011	0.0545	0.0011	0.30926	340.9	8.3	22	342.3	6.8	10	287	67	110	100.411	119.268
Plesovice_3	7424_TRA_Data 238ReCal 07um April12 data	8.114	41	61200	1167	0.14156	47.247	2604.26	106.383	18.38	0.34	0.0549	0.0018	0.43	0.014	0.0546	0.001	0.31754	363	10	24	342.6	6.2	10	401	78	120	94.3802	85.4364
Plesovice_4	7424_TRA_Data 238ReCal 07um April12 data	8.112	40	64000	1356	0.238938	29.9338	1910.45	62.6866	20.3	0.51	0.0606	0.002	0.419	0.013	0.0491	0.0012	0.42068	354.8	9.3	23	309.1	7.1	10	621	67	110	87.1195	49.7746
Plesovice_5	7424_TRA_Data 238ReCal 07um April12 data	8.117	41	100900	1920	0.132292	46.8293	1588.98	66.1417	18.43	0.27	0.05217	0.00091	0.4036	0.007	0.05438	0.00078	0.57417	344.1	5.1	21	341.3	4.7	9.3	287	40	100	99.1863	118.92	2	341.58	1.6999	1.7016	1.32898
Plesovice_6	7424_TRA_Data 238ReCal 07um April12 data	8.128	41	90800	1737	0.125043	48.9296	2487.67	63.0137	18.38	0.35	0.0522	0.0011	0.4019	0.0095	0.0544	0.0011	0.60408	342.8	6.8	21	341.5	6.6	10	288	48	110	99.6208	118.576
Plesovice_7	7424_TRA_Data 238ReCal 07um April12 data	8.132	41	83700	1627	0.126183	51.3249	3561.7	123.404	18.73	0.27	0.0523	0.0014	0.3923	0.0094	0.0535	0.00078	0.21928	335.8	6.9	21	335.9	4.8	9.2	287	62	110	100.03	117.038
Plesovice_8	7424_TRA_Data 238ReCal 07um April12 data	8.116	40	68100	1299	0.120785	52.5911	9080	253.333	18.4	0.39	0.0527	0.0014	0.4053	0.0077	0.054	0.001	0.11172	346.6	5.2	20	338.8	6.4	10	326	65	120	97.7496	103.926
Plesovice_9	7424_TRA_Data 238ReCal 07um April12 data	8.109	41	110000	2120	0.134906	45.2026	20000	781.818	18.63	0.28	0.0535	0.0011	0.4078	0.0088	0.05379	0.00079	0.26825	347.1	6.4	21	337.7	4.8	9.3	351	49	110	97.2918	96.2108
Plesovice_10	7424_TRA_Data 238ReCal 07um April12 data	8.128	41	91700	1757	0.127661	49.0782	6324.14	213.793	18.39	0.31	0.0523	0.001	0.4039	0.0095	0.05452	0.00091	0.437	344.3	6.9	21	342.2	5.6	9.8	291	45	100	99.3901	117.595
R33_1	7423_TRA_Data 238ReCal 07um April12 data	8.124	41	16790	262	0.828244	5.94104	460	16.4384	15.04	0.59	0.058	0.0032	0.546	0.026	0.066	0.0027	0.42677	441	17	30	412	16	19	550	120	150	93.424	74.9091
R33_2	7423_TRA_Data 238ReCal 07um April12 data	8.114	40	12300	183.7	0.504083	9.32487	482.353	15.2941	14.49	0.54	0.0575	0.003	0.542	0.028	0.0691	0.0026	0.39873	441	17	29	430	16	19	510	120	150	97.5057	84.3137
R33_3	7423_TRA_Data 238ReCal 07um April12 data	8.13	41	8200	123.9	0.490718	10.4118	184.27	8.08989	15.26	0.7	0.0547	0.0037	0.502	0.039	0.0651	0.0029	0.51689	410	26	35	406	17	20	430	140	160	99.0244	94.4186
R33_4	7423_TRA_Data 238ReCal 07um April12 data	8.112	41	26230	412	0.691748	7.61553	2280.87	80	15.39	0.37	0.0541	0.0018	0.485	0.019	0.0651	0.0016	0.3579	401	13	26	406.4	9.6	13	376	69	110	101.347	108.085
R33_5	7423_TRA_Data 238ReCal 07um April12 data	8.109	41	29650	449	0.877506	5.39663	587.129	19.604	14.84	0.32	0.0567	0.0029	0.531	0.022	0.0674	0.0015	0.0129	431	15	29	420.7	9.2	13	440	110	140	97.6102	95.6136	0	420.35	3.6631	2.6215	0.250417
R33_6	7423_TRA_Data 238ReCal 07um April12 data	8.117	41	10390	160.9	0.608452	9.35465	903.478	37.3913	15.33	0.65	0.0583	0.0036	0.525	0.034	0.0659	0.0027	0.3033	426	23	33	411	16	19	540	140	170	96.4789	76.1111
R33_7	7424_TRA_Data 238ReCal 07um April12 data	8.126	41	17960	269	0.92342	5.40161	588.852	21.6393	14.56	0.45	0.0536	0.0025	0.516	0.025	0.0685	0.002	0.47582	421	17	29	427	12	16	420	100	140	101.425	101.667
R33_8	7424_TRA_Data 238ReCal 07um April12 data	8.117	40	17930	267	0.79588	6.35714	323.063	11.1712	14.49	0.4	0.0551	0.0029	0.511	0.03	0.0689	0.0019	0.32057	421	19	30	429	12	15	380	110	140	101.9	112.895
R33_9	7424_TRA_Data 238ReCal 07um April12 data	8.108	41	12880	188	0.606383	7.83333	276.989	7.31183	14.44	0.54	0.0527	0.0034	0.5	0.029	0.0702	0.0026	0.38116	410	20	31	437	16	19	320	130	160	106.585	136.562
R33_10	7424_TRA_Data 238ReCal 07um April12 data	8.123	41	15910	242	0.891322	5.7619	521.639	16.3934	14.96	0.51	0.0539	0.0031	0.5	0.026	0.0667	0.0023	0.23758	410	17	29	416	14	17	330	120	150	101.463	126.061
Temora2_1	7423_TRA_Data 238ReCal 07um April12 data	8.116	41	14020	226.9	0.624063	8.86328	1869.33	69.3333	15	0.53	0.0562	0.0025	0.529	0.03	0.0667	0.0023	0.51711	429	20	31	416	14	17	460	100	140	96.9697	90.4348
Temora2_2	7423_TRA_Data 238ReCal 07um April12 data	8.129	41	24700	409	0.389731	12.7812	377.099	19.8473	15.57	0.43	0.0558	0.0021	0.504	0.022	0.0638	0.0017	0.42233	413	15	28	398	10	14	425	84	120	96.368	93.6471
Temora2_3	7423_TRA_Data 238ReCal 07um April12 data	8.112	41	14700	252.5	0.602376	9.6374	402.74	10.9589	15.94	0.53	0.0567	0.003	0.501	0.027	0.0631	0.0022	0.33438	411	18	29	394	13	16	440	120	150	95.8637	89.5455
Temora2_4	7423_TRA_Data 238ReCal 07um April12 data	8.114	41	16500	263	0.644867	8.14241	277.311	8.7395	14.89	0.5	0.0542	0.0037	0.5	0.034	0.0674	0.0021	0.24135	409	23	33	420	13	16	330	150	170	102.689	127.273
Temora2_5	7423_TRA_Data 238ReCal 07um April12 data	8.124	41	18500	299	0.61204	8.42254	327.434	19.469	14.89	0.47	0.0574	0.0031	0.532	0.025	0.0666	0.0022	0.26933	435	16	28	416	13	17	550	110	140	95.6322	75.6364	0	410.88	3.717	2.5168	-1.41561
Temora2_6	7423_TRA_Data 238ReCal 07um April12 data	8.124	41	16540	260	0.6	8.46906	648.627	32.549	15.11	0.35	0.0581	0.0026	0.537	0.029	0.0665	0.0015	0.41952	435	19	31	415.2	9.3	13	520	100	140	95.4483	79.8462
Temora2_7	7423_TRA_Data 238ReCal 07um April12 data	8.112	41	15600	249	0.404418	11.7453	945.455	46.0606	15.09	0.43	0.0556	0.003	0.527	0.029	0.0662	0.0019	0.32825	428	20	31	413	12	15	440	120	160	96.4953	93.8636
Temora2_8	7423_TRA_Data 238ReCal 07um April12 data	8.131	41	20780	344	0.394477	12.6007	585.352	22.2535	15.51	0.5	0.0542	0.0019	0.484	0.023	0.0639	0.002	0.63539	400	16	28	399	12	15	377	73	110	99.75	105.836
Temora2_9	7423_TRA_Data 238ReCal 07um April12 data	8.121	41	22400	355	0.406479	11.9932	258.96	9.24855	14.98	0.51	0.0551	0.0024	0.511	0.029	0.0667	0.0023	0.48866	417	20	31	416	14	17	390	100	140	99.7602	106.667
Temora2_10	7423_TRA_Data 238ReCal 07um April12 data	8.123	41	11830	188.5	0.603714	7.88703	213.153	5.58559	15.67	0.65	0.0548	0.0031	0.472	0.029	0.0645	0.0027	0.44106	391	20	30	403	16	19	390	130	160	103.069	103.333
Z_91500_1	7423_TRA_Data 238ReCal 07um April12 data	8.11	41	14400	81.2	0.374877	5.84173	279.612	7.76699	5.65	0.26	0.0742	0.0038	1.85	0.11	0.1792	0.0084	0.50452	1063	43	64	1061	46	52	1030	110	140	99.8119	103.01
Z_91500_2	7423_TRA_Data 238ReCal 07um April12 data	8.123	41	14010	81.1	0.363748	5.5931	220.63	6.92913	5.59	0.18	0.0728	0.0041	1.827	0.089	0.1786	0.0057	0.19851	1050	33	57	1058	31	39	1010	110	140	100.762	104.752
Z_91500_3	7423_TRA_Data 238ReCal 07um April12 data	8.118	41	13800	80.8	0.367574	5.28105	1452.63	37.8947	5.66	0.23	0.0721	0.0044	1.77	0.12	0.1763	0.0073	0.4682	1034	46	65	1046	40	46	1010	120	140	101.161	103.564
Z_91500_4	7423_TRA_Data 238ReCal 07um April12 data	8.113	41	13910	76.8	0.396094	4.89172	843.03	27.2727	5.42	0.27	0.0779	0.0029	1.97	0.12	0.1846	0.0092	0.74521	1105	42	63	1090	50	56	1129	73	110	98.6425	96.5456
Z_91500_5	7423_TRA_Data 238ReCal 07um April12 data	8.117	41	13860	81.1	0.367078	5.91971	486.316	16.1404	5.69	0.36	0.0731	0.0034	1.86	0.12	0.177	0.012	0.69099	1057	44	63	1049	63	67	1024	94	130	99.2431	102.441
Z_91500_6	7423_TRA_Data 238ReCal 07um April12 data	8.111	41	13250	80.4	0.359453	5.12102	679.487	17.9487	5.53	0.25	0.0747	0.0036	1.83	0.11	0.1816	0.0084	0.6591	1066	38	59	1074	46	52	1060	100	130	100.75	101.321
Z_91500_7	7423_TRA_Data 238ReCal 07um April12 data	6.6008	34	13350	78.5	0.375796	5.16447	1068	31.2	5.64	0.32	0.074	0.0051	1.81	0.16	0.1766	0.0099	0.54711	1050	52	67	1058	57	62	1050	140	170	100.762	100.762	0	1062.7	9.5	0.66276	0.028238
Z_91500_8	7423_TRA_Data 238ReCal 07um April12 data	8.11	41	14440	81.6	0.397059	4.88623	28880	860	5.5	0.21	0.0739	0.004	1.97	0.13	0.1829	0.007	0.52485	1098	44	64	1082	38	45	1060	110	130	98.5428	102.075
Z_91500_9	7423_TRA_Data 238ReCal 07um April12 data	8.121	41	13580	79.3	0.361917	5.62411	1597.65	40	5.63	0.24	0.0762	0.0033	1.869	0.09	0.1794	0.0074	0.46607	1066	32	56	1063	41	47	1094	90	120	99.7186	97.1664
Z_91500_10	7424_TRA_Data 238ReCal 07um April12 data	8.127	41	13900	81.6	0.360294	4.8	678.049	20	5.77	0.29	0.0763	0.0039	1.78	0.11	0.1729	0.0081	0.59676	1030	39	60	1027	45	50	1090	110	130	99.7087	94.2202
Z_91500_11	7424_TRA_Data 238ReCal 07um April12 data	8.114	41	14190	79.4	0.384131	5.18954	341.928	12.7711	5.54	0.27	0.0768	0.0034	1.86	0.12	0.1818	0.0099	0.75273	1068	39	57	1075	54	59	1105	93	130	100.655	97.2851
Z_91500_12	7424_TRA_Data 238ReCal 07um April12 data	8.115	40	13450	78.9	0.377693	4.96226	277.32	6.80412	5.68	0.23	0.0731	0.0043	1.78	0.11	0.1755	0.008	0.62959	1030	40	60	1051	41	46	1020	120	140	102.039	103.039
Z_91500_13	7424_TRA_Data 238ReCal 07um April12 data	8.215	41	13860	81.2	0.364532	5.63889	274.455	9.10891	5.59	0.3	0.0775	0.0044	1.92	0.12	0.1819	0.0094	0.5859	1081	42	61	1076	51	56	1130	110	130	99.5375	95.2212
Z_91500_14	7424_TRA_Data 238ReCal 07um April12 data	8.118	41	14010	82	0.372683	5.50336	1120.8	32.8	5.56	0.31	0.073	0.0038	1.84	0.1	0.181	0.01	0.67197	1054	37	58	1068	56	61	990	110	140	101.328	107.879
Z_91500_15	7424_TRA_Data 238ReCal 07um April12 data	8.123	41	13660	78.8	0.376269	5.75182	9106.67	280	5.67	0.33	0.0736	0.0041	1.89	0.14	0.18	0.01	0.69028	1075	47	65	1067	55	60	1010	110	140	99.2558	105.644
1 concentration uncertainty c.20%
2&3 data not corrected for common-Pb
4 Concordence calculated as (206Pb-238U age/207Pb-235U age)*100
5 Concordance calculated as (206Pb-238U age/207Pb-206Pb age)*100
Decay constants of Jaffey et al. (1971) Precision measurement of half-lives and specific activities of 235U and 238U. Physical Reviews, C 4: 1889-1906.
Uncertainties quoted are Iolite output of 2SE that is expressed at 2 sigma level for internal errors only and 2SE sys represent propagated systematic error (Internal error + Calculated Excess uncertainity) (Paton et al.(2010) Improved laser ablation U-Pb zircon geochronology through robust downhole fractionation correction: G3, 11, doi: 10.1029/2009GC002618.)

## Sheet: 07um07s FMT A4
Supplementary Data Table A4: U-Pb data for 7 µm spots, 7 sec integration interval
12/04/2018 Mineral Isotope Laser Laboratory (MILL), Texas Tech University										Data for Tera-Wasserburg plot2				Data for Wetherill plot3					Dates (Ma)3									207-235	207-206			Concordia Age (Ma)		%Age Offset
Identifier	Comments	Duration (s)	#points	206Pb cps	U ppm1	Th/U1	U/Pb1	206Pb/204Pb	2SE	238U/206Pb	2SE	207Pb/206Pb	2SE	207Pb/235U	2SE	206Pb/238U	2SE	Rho	207Pb/235U	2s	2ssys	206Pb/238U	2s	2ssys	207Pb/206Pb	2s	2ssys	% Conc4	% Conc5	Rejects	Age	+2SE	MSWD
FC_1_1	7423_TRA_Data 238ReCal 07um April12 data	5.113	25	111900	592	1.30068	1.41966	3340.3	95.5224	5.5	0.1	0.0775	0.0015	2.045	0.04	0.1823	0.0033	0.57577	1134	12	48	1079	18	18	1132	38	82	95.1499	95.318
FC_1_2	7423_TRA_Data 238ReCal 07um April12 data	5.114	26	99400	517	0.781431	2.34893	3898.04	94.1176	5.45	0.15	0.0786	0.0019	2.093	0.072	0.1844	0.0053	0.68607	1145	24	58	1090	29	29	1156	47	85	95.1965	94.2907
FC_1_3	7423_TRA_Data 238ReCal 07um April12 data	5.155	26	89500	655	1.93435	0.968935	22327.3	600	5.48	0.14	0.078	0.0023	2.067	0.058	0.1833	0.0047	0.46574	1137	19	56	1085	26	26	1152	61	98	95.4266	94.184
FC_1_4	7423_TRA_Data 238ReCal 07um April12 data	5.118	26	140300	738	2.0393	0.9	40085.7	742.857	5.48	0.12	0.0786	0.0017	2.071	0.047	0.1812	0.004	0.47271	1138	15	55	1073	22	22	1158	44	86	94.2882	92.6598
FC_1_5	7423_TRA_Data 238ReCal 07um April12 data	5.111	26	56800	287	0.681533	1.53148	287.595	6.58228	5.2	0.15	0.1097	0.0035	3.01	0.14	0.1919	0.006	0.68635	1406	37	70	1131	32	32	1786	59	90	80.441	63.3259	0	NA	NA	NA	NA
FC_1_6	7423_TRA_Data 238ReCal 07um April12 data	5.124	26	109700	599	1.4975	1.29935	12905.9	482.353	5.53	0.16	0.0776	0.0021	2.02	0.052	0.1807	0.0049	0.40608	1121	17	55	1071	27	27	1132	52	88	95.5397	94.6113
FC_1_7	7423_TRA_Data 238ReCal 07um April12 data	5.13	26	81800	434	0.960829	1.92035	163600	3200	5.39	0.2	0.0794	0.0018	2.06	0.077	0.1856	0.0066	0.72252	1134	26	58	1097	36	36	1191	49	94	96.7372	92.1075
FC_1_8	7423_TRA_Data 238ReCal 07um April12 data	5.129	26	90900	506	1.42292	1.32808	1553.85	39.3162	5.36	0.12	0.0791	0.0016	2.054	0.065	0.1848	0.0043	0.77313	1138	20	52	1093	24	24	1170	39	83	96.0457	93.4188
FC_1_9	7423_TRA_Data 238ReCal 07um April12 data	5.197	26	72800	405.5	1.65475	1.17197	5020.69	151.724	5.36	0.15	0.0813	0.0027	2.103	0.057	0.1863	0.0054	0.34603	1149	19	56	1101	29	29	1219	64	97	95.8225	90.3199
FC_1_10	7423_TRA_Data 238ReCal 07um April12 data	5.111	26	83400	454.3	1.42417	1.23117	7942.86	190.476	5.19	0.14	0.0884	0.0026	2.413	0.068	0.1934	0.0051	0.47563	1245	20	59	1140	27	27	1397	58	95	91.5663	81.6034
FishCan_1	7424_TRA_Data 238ReCal 07um April12 data	5.121	26	4290	1019	0.627085	107.263	56.8212	2.38411	227.6	9	0.0508	0.006	0.0306	0.0036	0.00444	0.00018	0.097751	30.6	3.5	4.2	28.5	1.1	1.1	230	260	270	93.1373	12.3913
FishCan_2	7424_TRA_Data 238ReCal 07um April12 data	5.127	26	874	200.6	1.09172	76.5649	194.222	19.1111	219	21	0.053	0.022	0.031	0.012	0.00482	0.00046	0.13224	30	12	12	31	3	3	30	720	720	103.333	103.333
FishCan_3	7424_TRA_Data 238ReCal 07um April12 data	5.118	26	862	222.4	1.07734	69.5	13.792	1.312	242	23	0.033	0.022	0.021	0.013	0.00429	0.00042	0.16011	21	13	13	27.6	2.7	2.7	NAN	850	850	131.429	NAN
FishCan_4	7424_TRA_Data 238ReCal 07um April12 data	5.113	25	910	235	1.10383	75.8065	44.3902	4.87805	227	26	0.053	0.021	0.027	0.011	0.00452	0.00056	0.0045133	27	11	11	29	3.6	3.6	250	680	680	107.407	11.6
FishCan_5	7424_TRA_Data 238ReCal 07um April12 data	5.127	26	3050	764	0.615183	119.375	37.8882	1.98758	224.4	9.5	0.0357	0.0095	0.0224	0.0059	0.0045	0.00019	0.015288	22.4	5.8	6.1	29	1.2	1.2	NAN	400	410	129.464	NAN
FishCan_6	7424_TRA_Data 238ReCal 07um April12 data	5.108	26	3310	830	0.671084	129.688	135.102	6.93878	217	12	0.0577	0.0079	0.0363	0.0047	0.0046	0.00025	0.13818	36.1	4.6	5.3	29.6	1.6	1.6	400	290	300	81.9945	7.4	0	28.912	0.47824	1.4382	1.52398
FishCan_7	7424_TRA_Data 238ReCal 07um April12 data	5.12	26	2910	759	0.55863	145.962	57.6238	3.76238	230	16	0.0445	0.0082	0.0267	0.0045	0.00442	0.0003	0.17818	26.7	4.4	4.9	28.4	2	2	NAN	360	370	106.367	NAN
FishCan_8	7424_TRA_Data 238ReCal 07um April12 data	5.106	25	2140	538	0.490706	141.579	35.3719	2.80992	222	14	0.047	0.012	0.0268	0.0063	0.00454	0.00029	0.07964	26.7	6.2	6.5	29.2	1.8	1.8	NAN	430	440	109.363	NAN
FishCan_9	7424_TRA_Data 238ReCal 07um April12 data	5.116	26	3700	929	0.557589	129.028	180.488	9.26829	222	12	0.0494	0.0063	0.0308	0.0035	0.00446	0.00026	0.15233	30.7	3.4	4.1	28.7	1.6	1.6	170	270	280	93.4853	16.8824
FishCan_10	7424_TRA_Data 238ReCal 07um April12 data	5.128	26	3170	780	0.642308	98.7342	71.236	4.04494	227	11	0.0437	0.0072	0.0269	0.004	0.00447	0.00022	0.20454	26.9	3.9	4.4	28.7	1.4	1.4	NAN	290	300	106.691	NAN
Plesovice_1	7424_TRA_Data 238ReCal 07um April12 data	5.113	26	61100	1062	0.145857	43.8843	6431.58	178.947	18.43	0.36	0.0529	0.0016	0.406	0.014	0.0544	0.0011	0.44422	346	10	25	341.4	6.5	6.5	314	69	110	98.6705	108.726
Plesovice_2	7424_TRA_Data 238ReCal 07um April12 data	5.114	26	62800	1052	0.153517	42.4194	1055.46	36.9748	18.79	0.54	0.0529	0.0018	0.391	0.015	0.0535	0.0015	0.45717	335	11	25	335.8	9.4	9.4	312	79	120	100.239	107.628
Plesovice_3	7424_TRA_Data 238ReCal 07um April12 data	5.114	26	65700	1065	0.161127	39.1544	1904.35	75.3623	18.69	0.37	0.0554	0.0022	0.421	0.016	0.0533	0.0011	0.36982	357	11	26	335	7	7	411	93	130	93.8375	81.5085
Plesovice_4	7424_TRA_Data 238ReCal 07um April12 data	5.112	25	67300	1212	0.277228	25.1975	1479.12	50.5495	20.79	0.58	0.0606	0.0024	0.411	0.016	0.0483	0.0014	0.30646	349	11	25	304.1	8.3	8.3	648	83	110	87.1347	46.929
Plesovice_5	7424_TRA_Data 238ReCal 07um April12 data	5.117	26	108400	1721	0.154213	38.0752	1707.09	42.5197	18.97	0.34	0.0532	0.001	0.3945	0.0087	0.05282	0.00095	0.43632	337.5	6.4	23	331.8	5.8	5.8	333	43	94	98.3111	99.6396	2	337.29	2.0466	1.6595	0.0563631
Plesovice_6	7424_TRA_Data 238ReCal 07um April12 data	5.128	26	94900	1481	0.143079	40.1355	3581.13	98.1132	18.7	0.48	0.054	0.0013	0.397	0.011	0.0533	0.0014	0.63794	339.2	8	23	335	8.8	8.8	363	57	100	98.7618	92.2865
Plesovice_7	7424_TRA_Data 238ReCal 07um April12 data	5.132	26	89800	1412	0.148229	41.6519	1618.02	64.8649	18.85	0.35	0.0525	0.002	0.384	0.012	0.05291	0.0009	0.082678	329.8	8.6	23	332.3	5.5	5.5	313	78	110	100.758	106.166
Plesovice_8	7424_TRA_Data 238ReCal 07um April12 data	5.116	25	72300	1126	0.13881	45.2209	6885.71	238.095	18.44	0.55	0.0544	0.002	0.4035	0.0081	0.0545	0.0016	0.14484	345.9	6.6	26	342	10	10	393	86	120	98.8725	87.0229
Plesovice_9	7424_TRA_Data 238ReCal 07um April12 data	5.109	26	117700	1931	0.152253	38.0118	78466.7	2933.33	18.68	0.36	0.0548	0.0015	0.397	0.011	0.05365	0.00099	0.40233	339.4	8.1	24	336.9	6.1	6.1	413	54	93	99.2634	81.5738
Plesovice_10	7424_TRA_Data 238ReCal 07um April12 data	5.128	26	98000	1662	0.138568	44.4385	2684.93	106.849	18.59	0.37	0.0553	0.0013	0.401	0.01	0.0539	0.0011	0.48859	342	7.4	23	338.6	6.6	6.6	420	53	99	99.0058	80.619
R33_1	7423_TRA_Data 238ReCal 07um April12 data	5.124	26	17580	279	0.805376	6.03896	2344	101.333	14.86	0.7	0.058	0.0037	0.57	0.029	0.0666	0.0031	0.28732	457	19	34	415	19	19	550	150	170	90.8096	75.4545
R33_2	7423_TRA_Data 238ReCal 07um April12 data	5.114	25	12880	194.2	0.489701	9.33654	260.202	11.7172	14.93	0.74	0.0596	0.0041	0.57	0.033	0.0673	0.0033	0.44394	456	21	35	420	20	20	550	150	170	92.1053	76.3636
R33_3	7423_TRA_Data 238ReCal 07um April12 data	5.13	26	8800	133.2	0.491742	9.79412	391.111	15.5556	14.96	0.8	0.0554	0.0042	0.536	0.045	0.0652	0.003	0.59607	433	30	41	407	18	18	420	170	190	93.9954	96.9048
R33_4	7423_TRA_Data 238ReCal 07um April12 data	5.112	25	27900	438	0.705479	7.63066	2936.84	90.5263	15.34	0.4	0.0534	0.0021	0.499	0.025	0.0654	0.0017	0.44451	410	17	31	409	10	10	333	90	120	99.7561	122.823
R33_5	7423_TRA_Data 238ReCal 07um April12 data	5.109	26	31200	467	0.888651	5.30682	2496	88	14.73	0.37	0.0517	0.0027	0.518	0.025	0.0681	0.0017	0.11969	423	17	31	425	10	10	280	120	150	100.473	151.786
R33_6	7423_TRA_Data 238ReCal 07um April12 data	5.117	26	11180	161.6	0.628094	9.18182	1315.29	49.4118	14.36	0.59	0.0566	0.0045	0.55	0.042	0.0689	0.0029	0.08976	443	27	39	429	18	18	460	180	200	96.8397	93.2609	0	426.62	4.3875	3.361	1.74577
R33_7	7424_TRA_Data 238ReCal 07um April12 data	5.126	26	19300	266	0.943609	5.14507	367.619	20.9524	14.23	0.56	0.0507	0.0029	0.524	0.033	0.0703	0.0027	0.47918	426	22	34	438	16	16	270	140	170	102.817	162.222
R33_8	7424_TRA_Data 238ReCal 07um April12 data	5.117	25	19190	263	0.836502	5.95023	1037.3	45.9459	14.19	0.53	0.0536	0.0038	0.532	0.042	0.0711	0.0027	0.44659	431	27	38	443	16	16	320	150	170	102.784	138.438
R33_9	7424_TRA_Data 238ReCal 07um April12 data	5.108	26	13280	180.1	0.629095	7.41152	153.526	4.50867	14.17	0.66	0.0522	0.0046	0.505	0.043	0.0708	0.0032	0.41553	413	28	38	441	19	19	290	170	190	106.78	152.069
R33_10	7424_TRA_Data 238ReCal 07um April12 data	5.123	26	16730	230.1	0.94611	5.31409	182.842	5.57377	14.16	0.56	0.0523	0.0036	0.512	0.034	0.0705	0.0027	0.39258	418	23	35	439	16	16	260	150	170	105.024	168.846
Temora2_1	7423_TRA_Data 238ReCal 07um April12 data	5.116	26	14830	222.3	0.631129	8.11314	1412.38	64.7619	14.6	0.6	0.0584	0.0035	0.552	0.041	0.0692	0.0027	0.47058	444	27	39	431	16	16	540	140	160	97.0721	79.8148
Temora2_2	7423_TRA_Data 238ReCal 07um April12 data	5.129	26	27200	409	0.399511	11.9242	391.367	18.705	15.31	0.52	0.058	0.0026	0.528	0.03	0.0648	0.002	0.41299	434	21	36	404	12	12	540	110	140	93.0876	74.8148
Temora2_3	7423_TRA_Data 238ReCal 07um April12 data	5.112	26	14940	237.4	0.637321	8.82528	609.796	21.2245	15.68	0.64	0.0597	0.0039	0.522	0.031	0.0639	0.0026	0.22508	425	20	34	399	16	16	590	150	170	93.8824	67.6271
Temora2_4	7423_TRA_Data 238ReCal 07um April12 data	5.114	26	17310	255	0.674902	7.84615	549.524	19.6825	14.78	0.53	0.0573	0.0043	0.515	0.043	0.0682	0.0025	0.33762	419	29	39	425	15	15	450	160	180	101.432	94.4444
Temora2_5	7423_TRA_Data 238ReCal 07um April12 data	5.124	26	20300	281	0.705694	7.15013	196.135	10.628	14.56	0.6	0.0577	0.0035	0.537	0.027	0.068	0.0028	0.3077	435	18	33	424	17	17	550	130	150	97.4713	77.0909	0	412.93	4.5838	3.8049	-0.923749
Temora2_6	7423_TRA_Data 238ReCal 07um April12 data	5.124	26	18060	266	0.647368	7.84661	573.333	25.3968	15.38	0.46	0.0595	0.0028	0.534	0.032	0.0654	0.002	0.64997	433	21	34	408	12	12	587	99	130	94.2263	69.506
Temora2_7	7423_TRA_Data 238ReCal 07um April12 data	5.112	26	16840	240	0.43875	11.1628	2245.33	104	15.03	0.54	0.0549	0.0035	0.528	0.034	0.0665	0.0023	0.44839	429	23	36	415	14	14	380	140	160	96.7366	109.211
Temora2_8	7423_TRA_Data 238ReCal 07um April12 data	5.131	26	21860	326	0.425767	11.2027	930.213	40	15.81	0.75	0.0568	0.003	0.512	0.035	0.0628	0.0031	0.67848	418	24	35	393	19	19	460	110	140	94.0191	85.4348
Temora2_9	7423_TRA_Data 238ReCal 07um April12 data	5.121	26	24110	343	0.425948	11.4333	292.242	9.81818	15.47	0.69	0.0557	0.0024	0.525	0.034	0.0648	0.0028	0.73283	437	23	35	405	17	17	444	91	120	92.6773	91.2162
Temora2_10	7423_TRA_Data 238ReCal 07um April12 data	5.123	26	11600	167.6	0.660501	6.95436	254.945	7.03297	15.62	0.77	0.0534	0.0042	0.481	0.035	0.0643	0.0032	0.43363	397	24	35	402	19	19	380	160	180	101.259	105.789
Z_91500_1	7423_TRA_Data 238ReCal 07um April12 data	5.11	25	14810	79.8	0.378446	5.7	1410.48	46.6667	5.63	0.42	0.0729	0.0048	1.7	0.14	0.176	0.012	0.62765	1011	54	74	1046	64	64	980	130	150	103.462	106.735
Z_91500_2	7423_TRA_Data 238ReCal 07um April12 data	5.123	26	14820	80.1	0.379526	5.4863	244.959	9.91736	5.54	0.18	0.0769	0.0053	1.89	0.11	0.1799	0.005	0.07398	1083	41	69	1066	28	28	1140	140	160	98.4303	93.5088
Z_91500_3	7423_TRA_Data 238ReCal 07um April12 data	5.118	26	14210	80.5	0.365217	5.59028	238.824	9.91597	5.63	0.33	0.0726	0.0048	1.74	0.14	0.174	0.011	0.61775	1017	50	71	1030	62	62	1000	120	140	101.278	103
Z_91500_4	7423_TRA_Data 238ReCal 07um April12 data	5.113	26	14470	78.4	0.380102	5.05806	782.162	37.2973	5.51	0.35	0.0794	0.004	2	0.15	0.184	0.012	0.69574	1119	50	70	1084	63	63	1190	100	130	96.8722	91.0924
Z_91500_5	7423_TRA_Data 238ReCal 07um April12 data	5.117	26	14660	81.4	0.359951	5.73239	465.397	14.6032	5.7	0.48	0.0724	0.0044	1.86	0.17	0.181	0.017	0.69469	1057	59	78	1068	91	91	970	120	150	101.041	110.103
Z_91500_6	7423_TRA_Data 238ReCal 07um April12 data	5.111	26	13940	80	0.35875	5.22876	3097.78	73.3333	5.47	0.32	0.0744	0.004	1.85	0.12	0.182	0.011	0.60789	1060	42	66	1074	58	58	1030	110	130	101.321	104.272
Z_91500_7	7423_TRA_Data 238ReCal 07um April12 data	3.6008	18	13770	80	0.36625	5.12821	562.041	20.4082	5.74	0.42	0.071	0.0082	1.7	0.21	0.175	0.012	0.51987	995	79	93	1036	66	66	1000	240	250	104.121	103.6	0	1062.6	11.134	1.0215	0.0188253
Z_91500_8	7423_TRA_Data 238ReCal 07um April12 data	5.11	26	15130	80.2	0.408978	5.0125	4322.86	122.857	5.68	0.28	0.0739	0.0039	1.96	0.14	0.1786	0.009	0.60966	1094	48	70	1058	49	49	1020	110	130	96.7093	103.725
Z_91500_9	7423_TRA_Data 238ReCal 07um April12 data	5.121	26	14110	79.7	0.373902	5.38514	332	10.3529	5.63	0.3	0.0765	0.0042	1.96	0.12	0.1808	0.0097	0.37493	1098	40	65	1070	53	53	1110	120	140	97.4499	96.3964
Z_91500_10	7424_TRA_Data 238ReCal 07um April12 data	5.127	25	14300	80.1	0.378277	4.2381	1059.26	40.7407	5.74	0.39	0.0768	0.0038	1.75	0.12	0.176	0.011	0.74214	1023	46	68	1044	62	62	1100	100	130	102.053	94.9091
Z_91500_11	7424_TRA_Data 238ReCal 07um April12 data	5.114	26	15090	79.9	0.387985	5.15484	304.848	11.1111	5.41	0.35	0.074	0.0034	1.88	0.14	0.181	0.011	0.82884	1068	48	69	1071	58	58	1042	95	120	100.281	102.783
Z_91500_12	7424_TRA_Data 238ReCal 07um April12 data	5.115	25	14190	79.7	0.365119	5.31333	190.47	3.89262	5.67	0.27	0.0731	0.0056	1.84	0.13	0.1786	0.0086	0.53598	1054	48	70	1059	47	47	1040	150	170	100.474	101.827
Z_91500_13	7424_TRA_Data 238ReCal 07um April12 data	5.215	26	14440	80.5	0.357764	5.26144	406.761	12.3944	5.6	0.36	0.0757	0.0051	1.89	0.14	0.181	0.012	0.51591	1081	52	74	1069	65	65	1110	140	150	98.8899	96.3063
Z_91500_14	7424_TRA_Data 238ReCal 07um April12 data	5.118	26	14740	80.2	0.381546	4.69006	1281.74	46.087	5.66	0.37	0.0747	0.005	1.77	0.14	0.177	0.013	0.67304	1028	50	70	1046	68	68	1050	140	160	101.751	99.619
Z_91500_15	7424_TRA_Data 238ReCal 07um April12 data	5.123	26	14050	79.9	0.370463	6.14615	624.444	23.1111	5.52	0.38	0.075	0.0049	1.86	0.17	0.181	0.012	0.69338	1070	56	74	1071	66	66	1060	130	140	100.093	101.038
1 concentration uncertainty c.20%
2&3 data not corrected for common-Pb
4 Concordence calculated as (206Pb-238U age/207Pb-235U age)*100
5 Concordance calculated as (206Pb-238U age/207Pb-206Pb age)*100
Decay constants of Jaffey et al. (1971) Precision measurement of half-lives and specific activities of 235U and 238U. Physical Reviews, C 4: 1889-1906.
Uncertainties quoted are Iolite output of 2SE that is expressed at 2 sigma level for internal errors only and 2SE sys represent propagated systematic error (Internal error + Calculated Excess uncertainity) (Paton et al.(2010) Improved laser ablation U-Pb zircon geochronology through robust downhole fractionation correction: G3, 11, doi: 10.1029/2009GC002618.)
